# Supplementary material for: Copper catalyzed borocarbonylation of benzylidenecyclopropanes through selective proximal C–C bond cleavage: synthesis of γ-boryl-γ,δ-unsaturated carbonyl compounds
Source: Royal Society of Chemistry journal article supplement (doi:10.1039/d2sc01992b), 2022-01-01

## Supporting information

### **Copper Catalyzed Borocarbonylation of Benzylidenecyclopropanes through Selective Proximal C–C Bond Cleavage: Synthesis of $\gamma$ -Boryl- $\gamma,\delta$ -unsaturated Carbonyl Compounds**

Li-Miao Yang,<sup>†</sup> Hui-Hui Zeng,<sup>†</sup> Xin-Lian Liu,<sup>†</sup> Ai-Jun Ma,<sup>†</sup> and Jin-Bao Peng<sup>\*,†</sup>

<sup>†</sup>School of Biotechnology and Health Sciences, Wuyi University, Jiangmen, Guangdong 529020, P. R. China; [orcid.org/0000-0002-0568-7740](https://orcid.org/0000-0002-0568-7740); E-mail: [pengjb\\_05@126.com](mailto:pengjb_05@126.com)

---

## **Table of Contents**

- 1. General Information**
- 2. Preparation of Substrates**
- 3. Optimization of Reaction Conditions**
- 4. General Procedure**
- 5. Spectroscopic Data of Products**
- 6. Derivatization Experiments**
- 7. References**
- 8. Copies of NMR Spectra for Compounds**

## 1. General Information

### Reagents, solvents, and analytical methods:

Unless otherwise noted, all reactions were carried out under a nitrogen atmosphere. methylcyclopropanes (MCPs) were synthesized according to existing method. The reagents were ordered from TCI, Energy Chemical and Bidepharm used without purification. All solvents were dried by standard techniques and distilled prior to use.  $^1\text{H}$  NMR spectra were recorded on a Bruker Ascend<sup>TM</sup> 500 spectrometer (500 MHz) and chemical shifts ( $\delta$  values) were reported in parts per million (ppm) relative to internal tetramethylsilane standard (TMS, 0ppm) and spectral data were reported in ppm relative to tetramethylsilane (TMS) as internal standard and  $\text{CDCl}_3$  ( $^1\text{H}$  NMR  $\delta$  7.27,  $^{13}\text{C}$  NMR  $\delta$  77.0) as solvent. All coupling constants ( $J$ ) are reported in Hz. The following abbreviations were used to describe peak splitting patterns when appropriate: s = singlet, d = doublet, dd = double doublet, ddd = double doublet of doublets, t = triplet, dt = double triplet, q = quatriplet, m = multiplet. All high-resolution mass spectra (HRMS) were obtained on a Thermo Scientific<sup>TM</sup> Q Exactive<sup>TM</sup> UHMR (Ultra High Mass Range) Hybrid Quadrupole-Orbitrap<sup>TM</sup> mass spectrometer.

## 2. Preparation of the Starting Materials.

### 2.1 Synthesis of phosphonium salts<sup>[1]</sup>

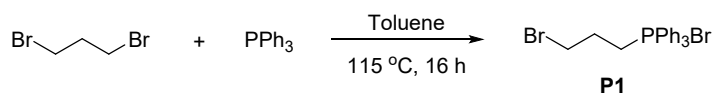

An oven-dried 250 mL two-neck round-bottom flask equipped with a Teflon magnetic stirring bar, a reflux condenser and an oil bubbler were connected to nitrogen. The system was charged with  $\text{PPh}_3$  (25.0 g, 95.2 mmol, 1.0 equiv) and toluene (100 mL). The vessel was sealed with a rubber septum and vigorously stirred at room temperature before adding 1,3-dibromopropane (10.2 mL, 20.2 g, 100 mmol, 1.05 equiv). The system was placed on a heating block and the temperature was increased to 115 °C with vigorously stirring. After 16 h, the reaction was cooled down to room temperature. The white precipitate was filtered off in vacuo, washed with toluene (3×15 mL) and dried under reduced pressure to afford P1 as a white solid.

### 2.2 Synthesis of methylcyclopropanes (MCPs)<sup>[2]</sup>

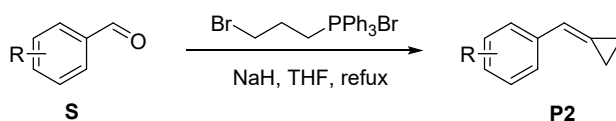

A solution of (4-bromobutyl)triphenylphosphonium bromide (6.01 g, 13 mmol) and NaH (1.04 g, 26 mmol) in THF (25 mL) was stirred at 70 °C under N<sub>2</sub> for 12 h. Afterwards compound S (10 mmol) in THF (5 mL) was added and the reaction solution was stirred at 70 °C until compound S was consumed completely. The reaction mixture was cooled to room temperature, and the mixture was filtered through a celite. The filtrate was concentrated under reduced pressure and the residue was purified by silica gel flash chromatography (eluent: petroleum ether) to afford the product P2 in moderate yield.

All of the chloroformate and acid chloride were from commercial sources and used without further purification(2a to 2w).

**methylene cyclopropane:**

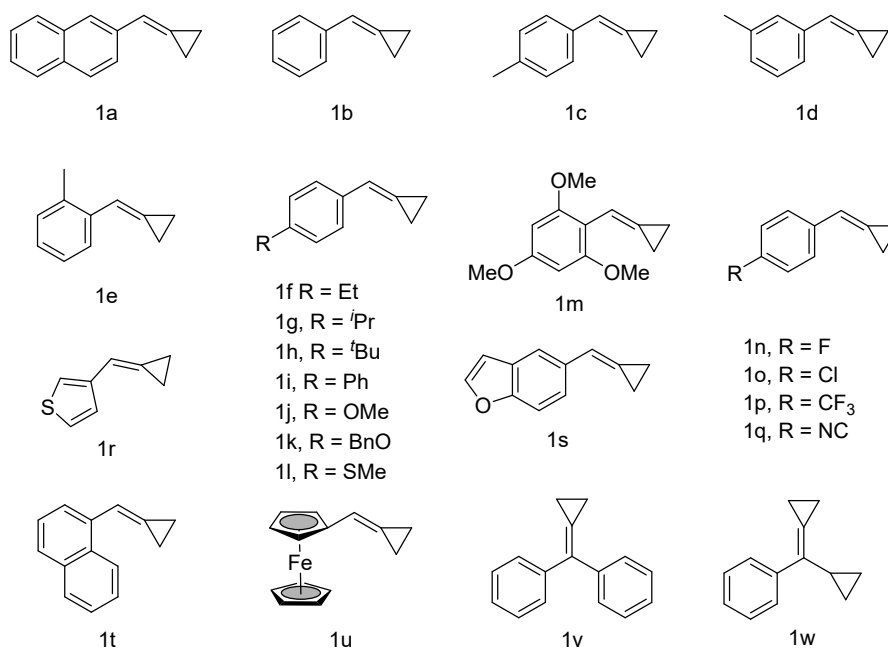

**Figure S1** Substrate of Methylene Cyclopropane

**Chloroformate:**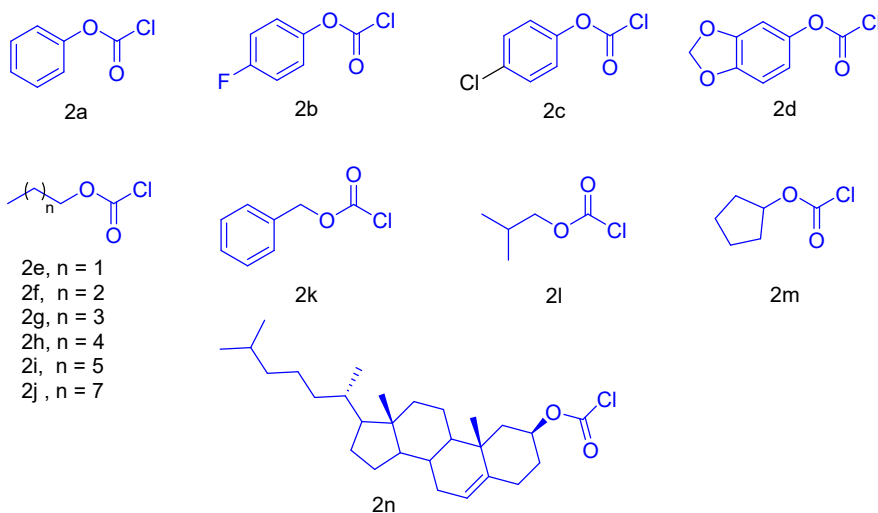**Acid Chloride:**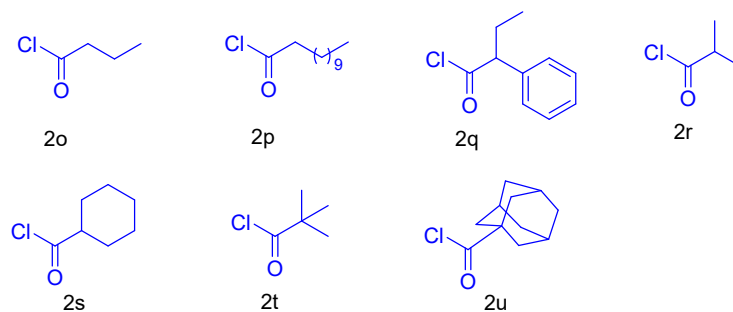**Figure S2** Substrate of Chloroformate and Acid Chloride**3. Optimization of the Reaction Conditions***Table S1.* Screening of Catalysts<sup>a</sup>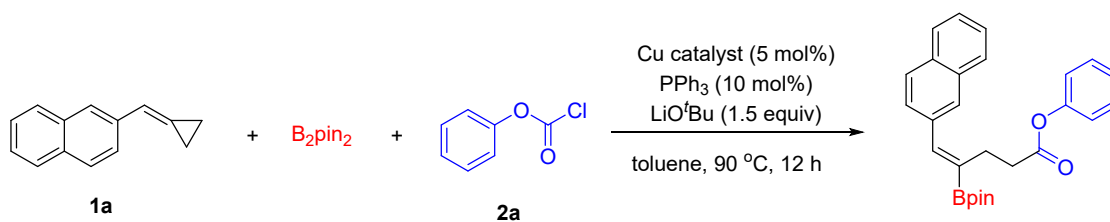

| Entry | Catalyst                                            | Yield (%) <sup>b</sup> |
|-------|-----------------------------------------------------|------------------------|
| 1     | IMesCuCl                                            | 58                     |
| 2     | IPrCuCl                                             | 26                     |
| 3     | CuTc                                                | 0                      |
| 4     | Cu(CH <sub>3</sub> CN) <sub>4</sub> PF <sub>6</sub> | 0                      |
| 5     | Cu(OAc) <sub>2</sub>                                | 0                      |

|   |                   |     |
|---|-------------------|-----|
| 6 | CuBr              | n.r |
| 7 | CuBr <sub>2</sub> | 0   |
| 8 | /                 | n.r |

<sup>a</sup>Reaction conditions: **1a** (0.10 mmol), **2a** (0.15 mmol), Cu catalysit (5 mol%), PPh<sub>3</sub> (10 mol%), NaO<sup>t</sup>Bu (0.15 mmol) in toluene (1.0 mL) at 90 °C for 12 h. <sup>b</sup>:Isolated yield.

Table S2. Screening of the Ligand<sup>a</sup>

| Entry    | Ligand             | Yield (%) <sup>b</sup> |
|----------|--------------------|------------------------|
| 1        | PPh <sub>3</sub>   | 58                     |
| 2        | BuPAD <sub>2</sub> | 29                     |
| 3        | DPPP               | 50                     |
| 4        | DMF                | trace                  |
| <b>5</b> | <b>BINAP</b>       | <b>67</b>              |
| 6        | Xantphos           | trace                  |
| 7        | dtbbpy             | 59                     |
| 8        | /                  | trace                  |

<sup>a</sup>Reaction conditions: **1a** (0.10 mmol), **2a** (0.15 mmol), IMesCuCl (5 mol%), Ligand (5 mol%), NaO<sup>t</sup>Bu (0.15 mmol) in toluene (1.0 mL) at 90 °C for 12 h. <sup>b</sup>:Isolated yields.

Table S3. Screening of the amount of the ligand<sup>a</sup>

| Entry    | X (mol%)   | Yield (%) <sup>b</sup> |
|----------|------------|------------------------|
| 1        | 2.5        | 57                     |
| 2        | 5          | 67                     |
| <b>3</b> | <b>7.5</b> | <b>69</b>              |
| 4        | 10         | 59                     |

<sup>a</sup>Reaction conditions: **1a** (0.10 mmol), **2a** (0.15 mmol), IMesCuCl (5 mol%), BINAP (X mol%), NaO<sup>t</sup>Bu (0.15 mmol) in toluene (1.0 mL) at 90 °C. <sup>b</sup>:Isolated yield.

Table S4. Screening of the base<sup>a</sup>

| Entry    | base                            | Yield (%) <sup>b</sup> |
|----------|---------------------------------|------------------------|
| 1        | Et <sub>3</sub> N               | n.r                    |
| 2        | K <sub>2</sub> CO <sub>3</sub>  | n.r                    |
| 3        | Cs <sub>2</sub> CO <sub>3</sub> | n.r                    |
| 4        | Na <sub>2</sub> CO <sub>3</sub> | trace                  |
| <b>5</b> | <b>LiO<sup>t</sup>Bu</b>        | <b>69</b>              |
| 6        | KO <sup>t</sup> Bu              | 58                     |
| 7        | NaO <sup>t</sup> Bu             | 0                      |
| 8        | NaOMe                           | 42                     |

<sup>a</sup>Reaction conditions: **1a** (0.10 mmol), **2a** (0.15 mmol), IMesCuCl (5 mol%), BINAP (7.5 mol%), base (0.15 mmol) in toluene (1.0 mL) at 90 °C. <sup>b</sup>:Isolated yield.

Table S5. Screening of the amount of the **2a**(Phenyl chloroformate)<sup>a</sup>

| Entry    | Y Equiv(SM <sub>3</sub> ) | Yield (%) <sup>b</sup> |
|----------|---------------------------|------------------------|
| 1        | 1.5                       | 69                     |
| 3        | 2                         | 62                     |
| 4        | 2.5                       | 63                     |
| 5        | 3                         | 81                     |
| <b>6</b> | <b>3.5</b>                | <b>89</b>              |

<sup>a</sup>Reaction conditions: **1a** (0.10 mmol), **2a** (Y mmol), IMesCuCl (5 mol%), BINAP (7.5 mol%), LiO<sup>t</sup>Bu (Y mmol) in toluene (1.0 mL) at 90 °C. <sup>b</sup>:Isolated yield.

Table S6. Screening of the Solvent<sup>a</sup>

| Entry    | Solvent        | Yield (%) <sup>b</sup> |
|----------|----------------|------------------------|
| <b>1</b> | <b>toluene</b> | <b>89</b>              |
| 2        | PhCl           | 76                     |

|   |         |       |
|---|---------|-------|
| 3 | DCM     | 19    |
| 4 | DMSO    | n.r   |
| 5 | DMF     | trace |
| 6 | MeCN    | 43    |
| 7 | THF     | trace |
| 8 | Dioxane | trace |

<sup>a</sup>Reaction conditions: **1a** (0.10 mmol), **2a** (0.35 mmol), IMesCuCl (5 mol%), BINAP (7.5 mol%), LiO<sup>t</sup>Bu (0.35 mmol) in toluene (1.0 mL) at 90 °C. <sup>b</sup>:Isolated yield.

Table S7. Screening of the Temperature<sup>a</sup>

| Entry          | Temp.(°C)  | Yield (%) <sup>b</sup> |
|----------------|------------|------------------------|
| 1              | 70         | 77                     |
| 2              | 80         | 84                     |
| 3              | 90         | 89                     |
| <b>4</b>       | <b>100</b> | <b>91</b>              |
| 4 <sup>c</sup> | 100        | 86                     |
| 5              | 110        | 79                     |

<sup>a</sup>Reaction conditions: **1a** (0.10 mmol), **2a** (0.35 mmol), IMesCuCl (5 mol%), BINAP (7.5 mol%), LiO<sup>t</sup>Bu (0.35 mmol) in toluene (1.0 mL) at 100 °C for 12 h. <sup>b</sup>:Isolated yield. <sup>c</sup>:3.0 equiv **2a**.

Table S8. Screening of the Additive<sup>a</sup>

| Entry | Additive | Yield (%) <sup>b</sup> |
|-------|----------|------------------------|
| 1     | 3Å Ms    | 89                     |
| 2     | 4Å Ms    | 81                     |
| 3     | 5Å Ms    | 80                     |

<sup>a</sup>Reaction conditions: **1a** (0.10 mmol), **2a** (0.35 mmol), IMesCuCl (5 mol%), BINAP (7.5 mol%), LiO<sup>t</sup>Bu (0.35 mmol) in toluene (1.0 mL) at 100 °C for 12 h. <sup>b</sup>:Isolated yield.



## 4. General Procedure

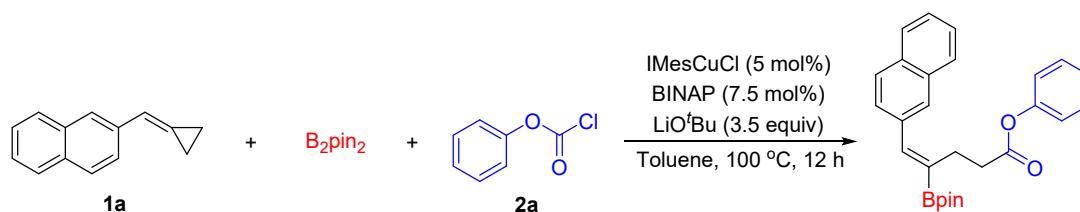

Under nitrogen atmosphere, **1a** (18.0 mg, 0.10 mmol), B<sub>2</sub>pin<sub>2</sub> (38.1 mg, 0.15 mmol), IMesCuCl (2.1 mg, 5 mol %), BINAP (4.7 mg, 7.5 mol%) and LiO<sup>t</sup>Bu (24 mg, 0.35 mmol) were added to an oven-dried 15 mL sealed tube. Then, **2a** (44μl, 0.35 mmol) and Toluene (1 mL) were added to the reaction. The tube was sealed and the mixture was stirred at 100 °C for 12 h. After the reaction was completed, the reaction mixture was filtered and concentrated under vacuum. The crude product was purified by column chromatography on silica gel to afford the corresponding product **3aa** to **3ua**.

**1 mmol scale:** A 15 mL sealed tube containing **1a** (0.18 g, 1.0 mmol), B<sub>2</sub>pin<sub>2</sub> (0.38 g, 1.5 mmol), IMesCuCl (0.02 g mol %), BINAP (0.05 g, 7.5 mol%) and LiO<sup>t</sup>Bu (0.24g, 0.35 mmol) were added to an oven-dried 15 mL sealed tube. Then, **2a** (0.4 mL, 0.35 mmol) and Toluene (3 mL) were added to the reaction. The tube was sealed and the mixture was stirred at 100 °C for 12 h. After the reaction was completed, the reaction mixture was filtered and concentrated under vacuum. The crude product was purified by column chromatography on silica gel to afford the **3aa** product(0.31 g, 72%).

## 5. Characterization Data of the Corresponding Products

Phenyl (*Z*)-5-(naphthalen-2-yl)-4-(4,4,5,5-tetramethyl-1,3,2-dioxaborolan-2-yl)pent-4-enoate (**3aa**)

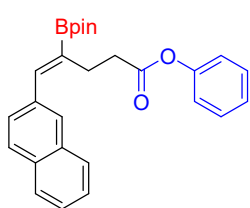

The title compound was prepared from the reaction of **1a** (18.0 mg, 0.10 mmol) and **2a** (44μl, 0.35 mmol) according to the General Procedure. It was purified by flash column chromatography on silica gel (40:1 petroleum ether/ethyl acetate) 38.9 mg (91% yield) a colorless oil.

**<sup>1</sup>H NMR (500 MHz, CDCl<sub>3</sub>)** δ 7.95-7.78 (m, 4H), 7.64-7.42 (m, 4H), 7.36 (t, *J* = 7.9 Hz, 2H), 7.23 (t, *J* = 7.4 Hz, 1H), 7.07 (d, *J* = 7.7 Hz, 2H), 3.09-2.95 (m, 2H), 2.93-2.79 (m, 2H), 1.38 (s, 12H);  
**<sup>13</sup>C NMR (126 MHz, CDCl<sub>3</sub>)** δ 171.9, 150.8, 143.9, 134.9, 133.3, 132.6, 129.6, 129.3, 128.3, 128.2, 127.9, 127.6, 127.1, 126.2, 125.7, 121.7, 83.8, 34.3, 25.1, 24.9 (quaternary carbon next to boron

could not be observed because of quadrupolar coupling effects); **HRMS (ESI)**: calcd. for  $C_{27}H_{29}BO_4$   $[M+Na]^+$ : 451.2059, found 451.2053.

4-Fluorophenyl(*Z*)-5-(naphthalen-2-yl)-4-(4,4,5,5-tetramethyl-1,3,2-dioxaborolan-2-yl)pent-4-enoate  
**(3ab)**

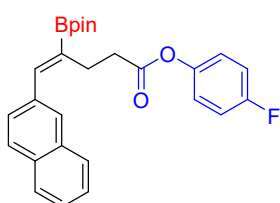

The title compound was prepared from the reaction of **1a** (18.0 mg, 0.10 mmol) and **2b** (46  $\mu$ l, 0.35 mmol) according to the General Procedure. It was purified by flash column chromatography on silica gel (40:1 petroleum ether/ethyl acetate) 38.9 mg (81% yield) a colorless oil.

**$^1H$  NMR (500 MHz,  $CDCl_3$ )**  $\delta$  7.84 (dd,  $J = 8.9, 2.8$  Hz, 4H), 7.53 (s, 1H), 7.52-7.43 (m, 3H), 7.05-6.93 (m, 4H), 3.02-2.93 (m, 2H), 2.89-2.77 (m, 2H), 1.37 (s, 12H);  **$^{13}C$  NMR (126 MHz,  $CDCl_3$ )**  $\delta$  171.8, 160.1 (d,  $J_{(C-F)} = 244.5$  Hz), 146.5 (d,  $J_{(C-F)} = 0.35$  Hz), 143.9, 134.8, 133.2, 132.5, 128.2, 128.1, 127.8, 127.6, 126.9, 126.1, 123.0, 122.9, 115.9 (d,  $J_{(C-F)} = 23.2$  Hz), 83.7, 34.2, 25.0, 24.8 (quaternary carbon next to boron could not be observed because of quadrupolar coupling effects);  **$^{19}F$  NMR (471 MHz,  $CDCl_3$ )**  $\delta$  -117.3; **HRMS (ESI)**: calcd. for  $C_{27}H_{28}BFO_4$   $[M+Na]^+$ : 469.1965, found 469.1965.

4-Chlorophenyl(*Z*)-5-(naphthalen-2-yl)-4-(4,4,5,5-tetramethyl-1,3,2-dioxaborolan-2-yl)pent-4-enoate  
**(3ac)**

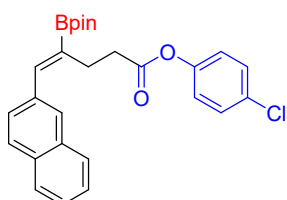

The title compound was prepared from the reaction of **1a** (18.0 mg, 0.10 mmol) and **2c** (49  $\mu$ l, 0.35 mmol) according to the General Procedure. It was purified by flash column chromatography on silica gel (40:1 petroleum ether/ethyl acetate) 25.1 mg (75% yield) a colorless oil.

**$^1H$  NMR (500 MHz,  $CDCl_3$ )**  $\delta$  7.83 (dd,  $J = 7.6, 5.2$  Hz, 4H), 7.53 (s, 1H), 7.51-7.45 (m, 4H), 7.00-6.94 (m, 3H), 3.00-2.93 (m, 2H), 2.82 (t,  $J = 7.9$  Hz, 2H), 1.41-1.32 (m, 12H);  **$^{13}C$  NMR (126 MHz,  $CDCl_3$ )**  $\delta$  171.5, 149.2, 144.0, 134.8, 133.2, 132.5, 130.9, 129.3, 128.2, 128.1, 127.8, 127.6, 127.0, 126.2, 123.0, 116.6, 83.7, 29.7, 24.8, 14.1 (quaternary carbon next to boron could not be observed because of quadrupolar coupling effects); **HRMS (ESI)**: calcd. for  $C_{27}H_{28}BClO_4$   $[M+K]^+$ : 501.1404, found 501.1405.

Benzo[*d*][1,3]dioxol-5-yl(*Z*)-5-(naphthalen-2-yl)-4-(4,4,5,5-tetramethyl-1,3,2-dioxaborolan-2-yl)pent-4-enoate (**3ad**)

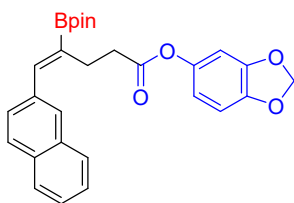

The title compound was prepared from the reaction of **1a** (18.0 mg, 0.10 mmol) and **2d** (70.2 mg, 0.35 mmol) according to the General Procedure. It was purified by flash column chromatography on silica gel (25:1 petroleum ether/ethyl acetate) 35.4 mg (75% yield) a colorless oil.

**<sup>1</sup>H NMR (500 MHz, CDCl<sub>3</sub>)**  $\delta$  7.83 (dd,  $J = 6.9, 2.9$  Hz, 4H), 7.50 (ddd,  $J = 9.6, 5.5, 3.2$  Hz, 4H), 6.75-6.71 (m, 1H), 6.58 (d,  $J = 2.3$  Hz, 1H), 6.48 (dd,  $J = 8.4, 2.3$  Hz, 1H), 5.98 (s, 2H), 2.99-2.89 (m, 2H), 2.85-2.74 (m, 2H), 1.36 (s, 12H); **<sup>13</sup>C NMR (126 MHz, CDCl<sub>3</sub>)**  $\delta$  172.1, 147.8, 145.0, 143.8, 134.8, 133.2, 132.5, 128.2, 128.1, 127.8, 127.5, 127.0, 126.1, 113.9, 108.0, 107.8, 103.8, 103.2, 101.6, 83.7, 34.1, 25.0, 24.8 (quaternary carbon next to boron could not be observed because of quadrupolar coupling effects); **HRMS (ESI)**: calcd. for C<sub>28</sub>H<sub>29</sub>BO<sub>6</sub> [M+Na]<sup>+</sup>: 495.1958, found 495.1959.

Propyl (*Z*)-5-(naphthalen-2-yl)-4-(4,4,5,5-tetramethyl-1,3,2-dioxaborolan-2-yl)pent-4-enoate (**3ae**)

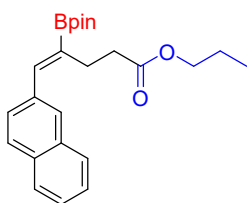

The title compound was prepared from the reaction of **1a** (18.0 mg, 0.10 mmol) and **2e** (39  $\mu$ l, 0.35 mmol) according to the General Procedure. It was purified by flash column chromatography on silica gel (40:1 petroleum ether/ethyl acetate) 32.7 mg (83% yield) a colorless oil.

**<sup>1</sup>H NMR (500 MHz, CDCl<sub>3</sub>)**  $\delta$  7.89-7.77 (m, 4H), 7.58-7.39 (m, 4H), 4.01 (t,  $J = 6.8$  Hz, 2H), 3.00-2.74 (m, 2H), 2.67-2.52 (m, 2H), 1.61 (dd,  $J = 14.3, 7.0$  Hz, 2H), 1.35 (s, 12H), 1.30-1.25 (m, 2H), 0.91 (t,  $J = 7.4$  Hz, 3H); **<sup>13</sup>C NMR (126 MHz, CDCl<sub>3</sub>)**  $\delta$  173.4, 143.3, 135.0, 133.2, 132.5, 128.2, 128.1, 127.7, 127.5, 127.0, 126.0, 83.6, 65.9, 34.3, 25.1, 24.8, 21.9, 10.4 (quaternary carbon next to boron could not be observed because of quadrupolar coupling effects); **HRMS (ESI)**: calcd. for C<sub>24</sub>H<sub>31</sub>BO<sub>4</sub> [M+Na]<sup>+</sup>: 417.2214, found 417.2213.

Butyl (Z)-5-(naphthalen-2-yl)-4-(4,4,5,5-tetramethyl-1,3,2-dioxaborolan-2-yl)pent-4-enoate (**3af**)

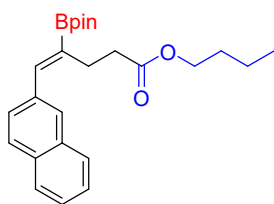

The title compound was prepared from the reaction of **1a** (18.0 mg, 0.10 mmol) and **2f** (45  $\mu$ l, 0.35 mmol) according to the General Procedure. It was purified by flash column chromatography on silica gel (40:1 petroleum ether/ethyl acetate) 30.6 mg (75% yield) a colorless oil.

**<sup>1</sup>H NMR (500 MHz, CDCl<sub>3</sub>)**  $\delta$  7.83 (dd,  $J$  = 9.0, 5.7 Hz, 4H), 7.47 (dd,  $J$  = 11.5, 8.1 Hz, 4H), 4.04 (t,  $J$  = 6.7 Hz, 2H), 2.86-2.75 (m, 2H), 2.65-2.47 (m, 2H), 1.65-1.48 (m, 2H), 1.35 (s, 12H), 1.27 (d,  $J$  = 4.2 Hz, 2H), 0.90 (t,  $J$  = 7.4 Hz, 3H); **<sup>13</sup>C NMR (126 MHz, CDCl<sub>3</sub>)**  $\delta$  173.4, 143.3, 135.0, 133.2, 132.5, 128.2, 128.1, 127.7, 127.5, 127.0, 126.1, 122.7, 83.6, 64.2, 34.3, 30.6, 25.12, 2.1, 13.7 (quaternary carbon next to boron could not be observed because of quadrupolar coupling effects); **HRMS (ESI)**: calcd. for C<sub>25</sub>H<sub>33</sub>BO<sub>4</sub> [M+Na]<sup>+</sup>: 431.2371, found 431.2374.

Pentyl (Z)-5-(naphthalen-2-yl)-4-(4,4,5,5-tetramethyl-1,3,2-dioxaborolan-2-yl)pent-4-enoate (**3ag**)

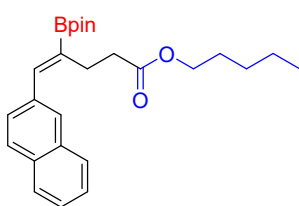

The title compound was prepared from the reaction of **1a** (18.0 mg, 0.10 mmol) and **2g** (49  $\mu$ l, 0.35 mmol) according to the General Procedure. It was purified by flash column chromatography on silica gel (40:1 petroleum ether/ethyl acetate) 35.0 mg (83% yield) a colorless oil.

**<sup>1</sup>H NMR (500 MHz, CDCl<sub>3</sub>)**  $\delta$  7.87-7.78 (m, 4H), 7.54-7.41 (m, 4H), 4.03 (t,  $J$  = 6.8 Hz, 2H), 2.88- 2.74 (m, 2H), 2.64-2.47 (m, 2H), 1.66-1.45 (m, 2H), 1.35 (s, 12H), 1.30 (dd,  $J$  = 7.3, 3.8 Hz, 4H), 0.88 (t,  $J$  = 7.0 Hz, 3H); **<sup>13</sup>C NMR (126 MHz, CDCl<sub>3</sub>)**  $\delta$  173.4, 143.3, 143.3, 134.9, 133.2, 132.5, 128.2, 128.1, 127.7, 127.5, 127.0, 126.0, 83.6, 64.5, 34.3, 28.3, 28.0, 25.1, 24.8, 22.3, 13.9 (quaternary carbon next to boron could not be observed because of quadrupolar coupling effects); **HRMS (ESI)**: calcd. for C<sub>26</sub>H<sub>35</sub>BO<sub>4</sub> [M+Na]<sup>+</sup>: 445.2528, found 445.2527.

Hexyl (Z)-5-(naphthalen-2-yl)-4-(4,4,5,5-tetramethyl-1,3,2-dioxaborolan-2-yl)pent-4-enoate (**3ah**)

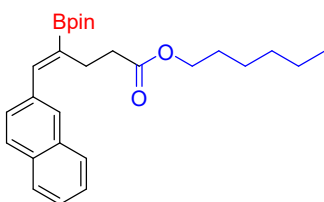

The title compound was prepared from the reaction of **1a** (18.0 mg, 0.10 mmol) and **2h** (51  $\mu$ l, 0.35 mmol) according to the General Procedure. It

was purified by flash column chromatography on silica gel (40:1 petroleum ether/ethyl acetate) 35.7 mg (82% yield) a colorless oil.

**<sup>1</sup>H NMR (500 MHz, CDCl<sub>3</sub>)** δ 7.83 (dd, *J* = 8.8, 6.0 Hz, 4H), 7.47 (dd, *J* = 10.7, 8.6 Hz, 4H), 4.03 (t, *J* = 6.8 Hz, 2H), 2.90-2.77 (m, 2H), 2.66-2.46 (m, 2H), 1.72-1.48 (m, 2H), 1.34 (s, 12H), 1.30-1.24 (m, 6H), 0.88 (t, *J* = 6.8 Hz, 3H); **<sup>13</sup>C NMR (126 MHz, CDCl<sub>3</sub>)** δ 173.4, 143.3, 134.9, 133.2, 132.5, 132.5, 128.2, 128.1, 127.7, 127.5, 127.0, 83.6, 64.5, 34.3, 31.4, 28.5, 25.6, 25.1, 24.8, 22.5, 14.0 (quaternary carbon next to boron could not be observed because of quadrupolar coupling effects); **HRMS (ESI)**: calcd. for C<sub>27</sub>H<sub>37</sub>BO<sub>4</sub> [M+Na]<sup>+</sup>: 459.2685, found 459.2685.

Heptyl (Z)-5-(naphthalen-2-yl)-4-(4,4,5,5-tetramethyl-1,3,2-dioxaborolan-2-yl)pent-4-enoate (**3ai**)

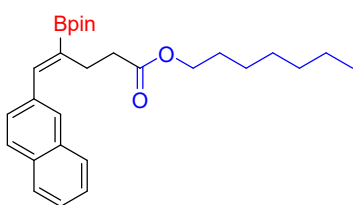

The title compound was prepared from the reaction of **1a** (18.0 mg, 0.10 mmol) and **2i** (63 μl, 0.35 mmol) according to the General Procedure. It was purified by flash column chromatography on silica gel (35:1 petroleum ether/ethyl acetate) 42.3 mg (94% yield) a colorless oil.

**<sup>1</sup>H NMR (500 MHz, CDCl<sub>3</sub>)** δ 7.90-7.77 (m, 4H), 7.48 (ddd, *J* = 13.0, 8.2, 6.0 Hz, 4H), 4.03 (t, *J* = 6.8 Hz, 2H), 2.89-2.74 (m, 2H), 2.58 (dd, *J* = 9.1, 7.1 Hz, 2H), 1.68-1.49 (m, 3H), 1.35 (s, 12H), 1.27 (s, 6H), 0.88 (t, *J* = 7.0 Hz, 4H); **<sup>13</sup>C NMR (126 MHz, CDCl<sub>3</sub>)** δ 173.4, 143.3, 134.9, 133.2, 132.5, 132.5, 128.2, 128.1, 127.7, 127.5, 127.0, 126.0, 83.6, 64.5, 34.3, 31.4, 28.5, 25.6, 25.1, 24.8, 22.5, 14.0 (quaternary carbon next to boron could not be observed because of quadrupolar coupling effects); **HRMS (ESI)**: calcd. for C<sub>28</sub>H<sub>39</sub>BO<sub>4</sub> [M+Na]<sup>+</sup>: 473.2842, found 473.2843.

Nonyl (Z)-5-(naphthalen-2-yl)-4-(4,4,5,5-tetramethyl-1,3,2-dioxaborolan-2-yl)pent-4-enoate (**3aj**)

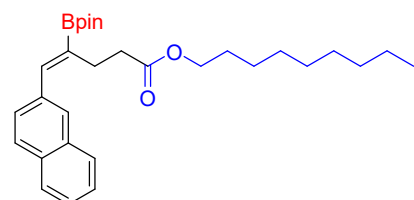

The title compound was prepared from the reaction of **1a** (18.0 mg, 0.10 mmol) and **2j** (75 μl, 0.35 mmol) according to the General Procedure. It was purified by flash column chromatography on silica gel (40:1 petroleum ether/ethyl acetate) 39.7 mg (83% yield) a colorless oil.

**<sup>1</sup>H NMR (500 MHz, CDCl<sub>3</sub>)** δ 7.83 (dd, *J* = 8.7, 6.0 Hz, 4H), 7.53-7.38 (m, 4H), 4.03 (t, *J* = 6.8 Hz, 2H), 2.86-2.75 (m, 2H), 2.64-2.50 (m, 2H), 1.57 (d, *J* = 7.2 Hz, 2H), 1.35 (s, 12H), 1.26 (s, 12H),

0.89 (t,  $J = 6.9$  Hz, 3H);  $^{13}\text{C}$  NMR (126 MHz,  $\text{CDCl}_3$ )  $\delta$  173.4, 143.3, 134.9, 133.2, 132.5, 128.2, 128.1, 127.7, 127.5, 127.0, 126.0, 127.5, 83.6, 64.5, 34.3, 31.8, 29.4, 29.2, 29.2, 28.6, 25.9, 25.1, 24.8, 22.6, 14.1 (quaternary carbon next to boron could not be observed because of quadrupolar coupling effects); HRMS (ESI): calcd. for  $\text{C}_{30}\text{H}_{43}\text{BO}_4$   $[\text{M}+\text{Na}]^+$ : 501.3157, found 501.3155.

Benzyl (Z)-5-(naphthalen-2-yl)-4-(4,4,5,5-tetramethyl-1,3,2-dioxaborolan-2-yl)pent-4-enoate (**3ak**)

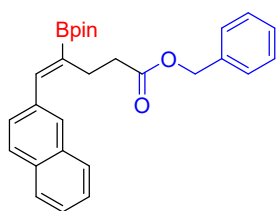

The title compound was prepared from the reaction of **1a** (18.0 mg, 0.10 mmol) and **2k** (49  $\mu\text{l}$ , 0.35 mmol) according to the General Procedure. It was purified by flash column chromatography on silica gel (40:1 petroleum ether/ethyl acetate) 37.6 mg (85% yield) a colorless oil.

$^1\text{H}$  NMR (500 MHz,  $\text{CDCl}_3$ )  $\delta$  7.86-7.75 (m, 4H), 7.48 (dd,  $J = 7.7, 4.0$  Hz, 4H), 7.32 (t,  $J = 2.7$  Hz, 5H), 5.09 (s, 2H), 2.94-2.79 (m, 2H), 2.69-2.55 (m, 2H), 1.33 (s, 12H);  $^{13}\text{C}$  NMR (126 MHz,  $\text{CDCl}_3$ )  $\delta$  173.1, 143.5, 136.0, 134.9, 133.2, 132.5, 132.5, 128.5, 128.2, 128.2, 128.1, 127.7, 127.5, 127.0, 126.1, 83.6, 66.1, 34.3, 25.1, 24.8 (quaternary carbon next to boron could not be observed because of quadrupolar coupling effects); HRMS (ESI): calcd. for  $\text{C}_{28}\text{H}_{31}\text{BO}_4$   $[\text{M}+\text{Na}]^+$ : 465.2216, found 465.2213.

Isobutyl (Z)-5-(naphthalen-2-yl)-4-(4,4,5,5-tetramethyl-1,3,2-dioxaborolan-2-yl)pent-4-enoate (**3al**)

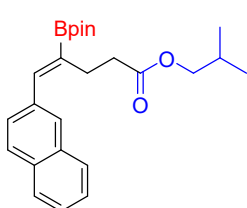

The title compound was prepared from the reaction of **1a** (18.0 mg, 0.10 mmol) and **2l** (48  $\mu\text{l}$ , 0.35 mmol) according to the General Procedure. It was purified by flash column chromatography on silica gel (40:1 petroleum ether/ethyl acetate) 31.8 mg (78% yield) a colorless oil.

$^1\text{H}$  NMR (500 MHz,  $\text{CDCl}_3$ )  $\delta$  7.86-7.76 (m, 4H), 7.51-7.46 (m, 3H), 7.45 (s, 1H), 3.83 (d,  $J = 6.7$  Hz, 2H), 2.91-2.78 (m, 2H), 2.66-2.50 (m, 2H), 1.89 (dt,  $J = 13.4, 6.7$  Hz, 1H), 1.35 (s, 12H), 0.90 (d,  $J = 6.7$  Hz, 6H);  $^{13}\text{C}$  NMR (126 MHz,  $\text{CDCl}_3$ )  $\delta$  173.4, 143.3, 134.9, 133.2, 132.5, 128.2, 128.1, 127.7, 127.5, 127.0, 126.0, 83.6, 70.4, 34.3, 27.6, 25.2, 24.8, 19.1 (quaternary carbon next to boron could not be observed because of quadrupolar coupling effects); HRMS (ESI): calcd. for  $\text{C}_{25}\text{H}_{33}\text{BO}_4$   $[\text{M}+\text{Na}]^+$ : 431.2371, found 431.2372.

Cyclopentyl (Z)-5-(naphthalen-2-yl)-4-(4,4,5,5-tetramethyl-1,3,2-dioxaborolan-2-yl)pent-4-enoate  
(**3am**)

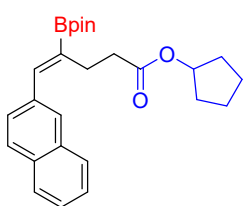

The title compound was prepared from the reaction of **1a** (18.0 mg, 0.10 mmol) and **2m** (44  $\mu$ l, 0.35 mmol) according to the General Procedure. It was purified by flash column chromatography on silica gel (40:1 petroleum ether/ethyl acetate) 29.0 mg (69% yield) a colorless oil.

**<sup>1</sup>H NMR (500 MHz, CDCl<sub>3</sub>)**  $\delta$  7.94-7.75 (m, 4H), 7.63-7.31 (m, 4H), 5.14 (td,  $J$  = 6.2, 3.2 Hz, 1H), 2.89-2.76 (m, 2H), 2.61-2.42 (m, 2H), 1.82 (dt,  $J$  = 11.8, 6.0 Hz, 2H), 1.75-1.61 (m, 4H), 1.55 (dd,  $J$  = 5.9, 4.0 Hz, 2H), 1.35 (s, 12H); **<sup>13</sup>C NMR (126 MHz, CDCl<sub>3</sub>)**  $\delta$  173.2, 143.2, 134.9, 133.2, 132.5, 128.2, 128.2, 127.7, 127.5, 127.1, 126.0, 83.6, 34.5, 32.6, 25.2, 24.8, 23.7 (quaternary carbon next to boron could not be observed because of quadrupolar coupling effects); **HRMS (ESI)**: calcd. for C<sub>26</sub>H<sub>33</sub>BO<sub>4</sub> [M+Na]<sup>+</sup>: 443.2372, found 443.2371.

(2*S*,9*S*,13*R*)-9,13-dimethyl-17-((*R*)-6-methylheptan-2-yl)-2,3,4,8,9,9,10,11,12,13,14,15,16,17-tetradecahydro-1H-cyclopenta[*c*]phenanthren-2-yl(Z)-5-(naphthalen-2-yl)-4-(4,4,5,5-tetramethyl-1,3,2-dioxaborolan-2-yl)pent-4-enoate (**3an**)

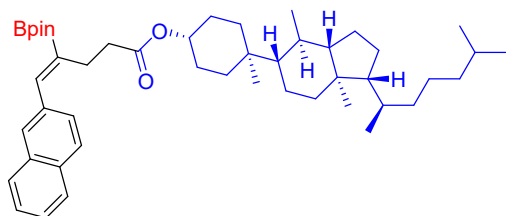

The title compound was prepared from the reaction of **1a** (18.0 mg, 0.10 mmol) and **2n** (157.2 mg, 0.35 mmol) according to the General Procedure. It was purified by flash column chromatography on silica gel (30:1 petroleum

ether/ethyl acetate) 23.8 mg (33% yield) a colorless oil.

**<sup>1</sup>H NMR (500 MHz, CDCl<sub>3</sub>)**  $\delta$  7.87-7.78 (m, 4H), 7.52-7.46 (m, 3H), 7.44 (s, 1H), 5.35 (d,  $J$  = 4.9 Hz, 1H), 4.65-4.54 (m, 1H), 2.88-2.79 (m, 2H), 2.62- 2.49 (m, 2H), 2.33-2.22 (m, 2H), 2.06-1.90 (m, 3H), 1.87-1.77 (m, 4H), 1.58-1.40 (m, 9H), 1.35 (s, 12H), 1.13 (ddd,  $J$  = 19.2, 11.2, 5.3 Hz, 9H), 0.99 (s, 3H), 0.93 (d,  $J$  = 6.5 Hz, 4H), 0.88 (dd,  $J$  = 6.6, 2.3 Hz, 6H), 0.69 (s, 3H); **<sup>13</sup>C NMR (126 MHz, CDCl<sub>3</sub>)**  $\delta$  172.8, 143.3, 139.8, 134.9, 133.2, 132.5, 128.2, 128.2, 127.7, 127.5, 127.1, 126.0, 122.5, 83.6, 73.8, 56.7, 56.1, 50.0, 42.3, 39.7, 39.5, 38.1, 37.0, 36.5, 36.2, 35.8, 34.6, 31.9, 31.8, 28.2, 28.0, 27.7, 25.2, 24.8, 24.3, 23.8, 22.8, 22.6, 21.0, 19.3, 18.7, 11.8 (quaternary carbon next to boron could

not be observed because of quadrupolar coupling effects); **HRMS (ESI)**: calcd. for  $C_{48}H_{69}BO_4$   $[M+Na]^+$ : 743.5191, found 743.5198.

(Z)-8-(naphthalen-2-yl)-7-(4,4,5,5-tetramethyl-1,3,2-dioxaborolan-2-yl)oct-7-en-4-one (**3ao**)

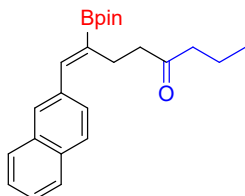

The title compound was prepared from the reaction of **1a** (18.0 mg, 0.10 mmol) and **2o** (42  $\mu$ l, 0.35 mmol) according to the General Procedure. It was purified by flash column chromatography on silica gel (50:1 petroleum ether/ethyl acetate) 9.1 mg (24% yield) a colorless oil.

**$^1H$  NMR (500 MHz,  $CDCl_3$ )**  $\delta$  7.81 (dd,  $J = 8.9, 4.2$  Hz, 1H), 7.78 (s, 1H), 7.49-7.44 (m, 1H), 7.42 (s, 1H), 2.78-2.72 (m, 1H), 2.66-2.59 (m, 1H), 2.36 (t,  $J = 7.4$  Hz, 1H), 1.60 (d,  $J = 7.3$  Hz, 2H), 1.39-1.29 (m, 5H), 0.89 (t,  $J = 7.4$  Hz, 2H);  **$^{13}C$  NMR (126 MHz,  $CDCl_3$ )**  $\delta$  210.9, 142.9, 128.2, 128.1, 127.7, 127.5, 127.0, 126.1, 126.0, 83.6, 44.6, 42.6, 24.8, 24.0, 17.3, 13.8. (quaternary carbon next to boron could not be observed because of quadrupolar coupling effects); **HRMS (ESI)**: calcd. for  $C_{24}H_{31}BO_3$   $[M+H]^+$ : 377.2293, found 377.2291.

(Z)-1-(naphthalen-2-yl)-2-(4,4,5,5-tetramethyl-1,3,2-dioxaborolan-2-yl)hexadec-1-en-5-one (**3ap**)

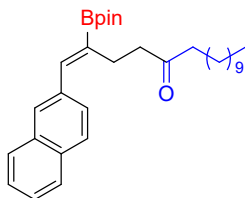

The title compound was prepared from the reaction of **1a** (18.0 mg, 0.10 mmol) and **2p** (73  $\mu$ l, 0.35 mmol) according to the General Procedure. It was purified by flash column chromatography on silica gel (50:1 petroleum ether/ethyl acetate) 23.9 mg (49% yield) a colorless oil.

**$^1H$  NMR (500 MHz,  $CDCl_3$ )**  $\delta$  7.87-7.71 (m, 4H), 7.46 (dd,  $J = 8.7, 7.6$  Hz, 3H), 7.41 (s, 1H), 2.80-2.69 (m, 2H), 2.67-2.55 (m, 2H), 2.37 (t,  $J = 7.5$  Hz, 2H), 1.33 (s, 12H), 1.24 (s, 18H), 0.88 (t,  $J = 6.9$  Hz, 3H);  **$^{13}C$  NMR (126 MHz,  $CDCl_3$ )**  $\delta$  211.1, 142.9, 135.0, 133.2, 132.5, 128.2, 128.1, 127.7, 127.5, 127.0, 126.1, 126.0, 83.6, 42.7, 42.6, 31.9, 29.6, 29.5, 29.4, 29.3, 29.3, 24.8, 24.0, 23.9, 22.7, 14.1 (quaternary carbon next to boron could not be observed because of quadrupolar coupling effects); **HRMS (ESI)**: calcd. for  $C_{32}H_{47}BO_3$   $[M+H]^+$ : 489.3545, found 489.3540.



(Z)-8-(naphthalen-2-yl)-3-phenyl-7-(4,4,5,5-tetramethyl-1,3,2-dioxaborolan-2-yl)oct-7-en-4-one

**(3aq)**

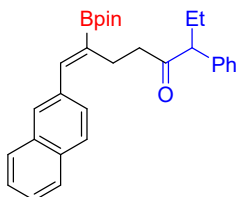

The title compound was prepared from the reaction of **1a** (18.0 mg, 0.10 mmol) and **2q** (58  $\mu$ l, 0.35 mmol) according to the General Procedure. It was purified by flash column chromatography on silica gel (50:1 petroleum ether/ethyl acetate) 21.7 mg (48% yield) a colorless oil.

**<sup>1</sup>H NMR (500 MHz, CDCl<sub>3</sub>)**  $\delta$  7.80 (dd,  $J$  = 6.0, 3.4 Hz, 1H), 7.73 (dd,  $J$  = 9.0, 3.9 Hz, 2H), 7.68 (s, 1H), 7.46 (dd,  $J$  = 6.2, 3.2 Hz, 2H), 7.37-7.31 (m, 2H), 7.27 (t,  $J$  = 7.3 Hz, 2H), 7.23 (d,  $J$  = 7.2 Hz, 1H), 7.17 (d,  $J$  = 7.0 Hz, 2H), 3.51 (t,  $J$  = 7.4 Hz, 1H), 2.78-2.43 (m, 4H), 2.05 (dt,  $J$  = 14.1, 7.1 Hz, 1H), 1.79-1.66 (m, 1H), 1.28 (d,  $J$  = 6.7 Hz, 12H), 0.80 (t,  $J$  = 7.4 Hz, 3H); **<sup>13</sup>C NMR (126 MHz, CDCl<sub>3</sub>)**  $\delta$  210.2, 142.8, 139.1, 134.9, 133.2, 132.5, 128.7, 128.3, 128.2, 128.0, 127.7, 127.5, 127.0, 126.9, 126.0, 83.5, 60.5, 41.8, 29.7, 25.1, 24.8, 24.7, 24.0, 12.1 (quaternary carbon next to boron could not be observed because of quadrupolar coupling effects); **HRMS (ESI)**: calcd. for C<sub>30</sub>H<sub>35</sub>BO<sub>3</sub> [M+H]<sup>+</sup>: 453.2606, found 453.2603.

(Z)-2-methyl-7-(naphthalen-2-yl)-6-(4,4,5,5-tetramethyl-1,3,2-dioxaborolan-2-yl)hept-6-en-3-one

**(3ar)**

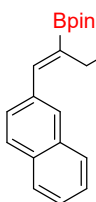

The title compound was prepared from the reaction of **1a** (18.0 mg, 0.10 mmol) and **2r** (31  $\mu$ l, 0.35 mmol) according to the General Procedure. It was purified by flash column chromatography on silica gel (50:1 petroleum ether/ethyl acetate) 32.5 mg (86% yield) a colorless oil.

**<sup>1</sup>H NMR (500 MHz, CDCl<sub>3</sub>)**  $\delta$  7.85-7.77 (m, 4H), 7.48 (dd,  $J$  = 5.9, 3.2 Hz, 3H), 7.42 (s, 1H), 2.76 (dd,  $J$  = 9.0, 6.9 Hz, 2H), 2.72-2.66 (m, 2H), 2.65-2.57 (m, 1H), 1.35 (s, 12H), 1.26 (s, 1H), 1.09 (d,  $J$  = 6.9 Hz, 6H); **<sup>13</sup>C NMR (126 MHz, CDCl<sub>3</sub>)**  $\delta$  214.3, 142.8, 135.0, 133.2, 132.5, 128.2, 128.1, 127.70, 127.52, 126.99, 126.05, 126.02, 83.54, 40.65, 40.15, 24.81, 24.02, 18.23 (quaternary carbon next to boron could not be observed because of quadrupolar coupling effects); **HRMS (ESI)**: calcd. for C<sub>24</sub>H<sub>31</sub>BO<sub>3</sub> [M+Na]<sup>+</sup>: 401.2265, found 401.2264.

(Z)-1-cyclohexyl-5-(naphthalen-2-yl)-4-(4,4,5,5-tetramethyl-1,3,2-dioxaborolan-2-yl)pent-4-en-1-one (**3as**)

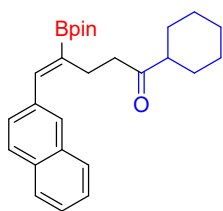

The title compound was prepared from the reaction of **1a** (18.0 mg, 0.10 mmol) and **2s** (47  $\mu$ l, 0.35 mmol) according to the General Procedure. It was purified by flash column chromatography on silica gel (50:1 petroleum ether/ethyl acetate) 37.2 mg (89% yield) a white solid.

**<sup>1</sup>H NMR (500 MHz, CDCl<sub>3</sub>)**  $\delta$  7.81 (dd,  $J$  = 8.3, 4.6 Hz, 4H), 7.47 (dd,  $J$  = 8.8, 4.3 Hz, 3H), 7.42 (s, 1H), 2.74 (dd,  $J$  = 12.9, 5.4 Hz, 2H), 2.67 (dd,  $J$  = 13.1, 5.5 Hz, 2H), 2.39-2.26 (m, 1H), 1.82 (d,  $J$  = 12.8 Hz, 2H), 1.76 (dd,  $J$  = 9.1, 2.9 Hz, 2H), 1.66 (d,  $J$  = 9.1 Hz, 2H), 1.35 (s, 12H), 1.27 (s, 2H), 1.01-0.79 (m, 2H); **<sup>13</sup>C NMR (126 MHz, CDCl<sub>3</sub>)**  $\delta$  213.7, 142.8, 135.0, 133.2, 132.5, 128.2, 128.0, 127.7, 127.5, 127.0, 126.1, 126.0, 83.5, 50.6, 40.5, 29.7, 28.5, 25.9, 25.7, 24.8, 24.0 (quaternary carbon next to boron could not be observed because of quadrupolar coupling effects); **HRMS (ESI)**: calcd. for C<sub>27</sub>H<sub>35</sub>BO<sub>3</sub> [M+Na]<sup>+</sup>: 441.2580, found 441.2581.

(Z)-2,2-dimethyl-7-(naphthalen-2-yl)-6-(4,4,5,5-tetramethyl-1,3,2-dioxaborolan-2-yl)hept-6-en-3-one (**3at**)

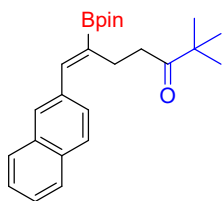

The title compound was prepared from the reaction of **1a** (18.0 mg, 0.10 mmol) and **2t** (66  $\mu$ l, 0.35 mmol) according to the General Procedure. It was purified by flash column chromatography on silica gel (50:1 petroleum ether/ethyl acetate) 35.9 mg (92% yield) a colorless oil.

**<sup>1</sup>H NMR (500 MHz, CDCl<sub>3</sub>)**  $\delta$  7.82-7.76 (m, 4H), 7.51-7.45 (m, 3H), 7.41 (s, 1H), 2.73 (s, 4H), 1.34 (s, 12H), 1.13 (s, 9H); **<sup>13</sup>C NMR (126 MHz, CDCl<sub>3</sub>)**  $\delta$  215.5, 142.7, 135.1, 133.2, 132.5, 128.2, 128.1, 127.7, 127.5, 127.0, 126.0, 126.0, 83.5, 44.1, 36.5, 26.4, 24.8, 24.3 (quaternary carbon next to boron could not be observed because of quadrupolar coupling effects); **HRMS (ESI)**: calcd. for C<sub>25</sub>H<sub>33</sub>BO<sub>3</sub> [M+H]<sup>+</sup>: 391.2450, found 391.2446.

(Z)-1-((3*r*,5*r*,7*r*)-adamantan-1-yl)-5-(naphthalen-2-yl)-4-(4,4,5,5-tetramethyl-1,3,2-dioxaborolan-2-yl)pent-4-en-1-one (**3au**)

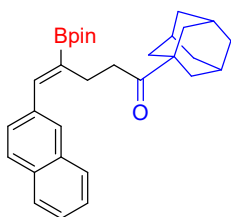

The title compound was prepared from the reaction of **1a** (18.0 mg, 0.10 mmol) and **2u** (66 $\mu$ l, 0.35 mmol) according to the General Procedure. It was purified by flash column chromatography on silica gel (50:1 petroleum ether/ethyl acetate) 43.7 mg (93% yield) a colorless oil.

**<sup>1</sup>H NMR (500 MHz, CDCl<sub>3</sub>)**  $\delta$  7.81 (dd,  $J$  = 7.4, 4.9 Hz, 4H), 7.55-7.44 (m, 3H), 7.41 (s, 1H), 2.70 (t,  $J$  = 3.0 Hz, 4H), 2.03 (s, 3H), 1.81 (d,  $J$  = 2.4 Hz, 6H), 1.71 (dd,  $J$  = 36.5, 11.9 Hz, 7H), 1.35 (s, 12H); **<sup>13</sup>C NMR (126 MHz, CDCl<sub>3</sub>)**  $\delta$  215.2, 142.6, 135.1, 133.2, 132.5, 128.2, 128.1, 127.7, 127.5, 127.1, 126.0, 126.0, 83.5, 46.3, 38.2, 36.6, 36.0, 27.9, 24.9, 24.1 (quaternary carbon next to boron could not be observed because of quadrupolar coupling effects); **HRMS (ESI)**: calcd. for C<sub>31</sub>H<sub>39</sub>BO<sub>3</sub> [M+Na]<sup>+</sup>: 493.2895, found 493.2894.

#### Phenyl (Z)-5-phenyl-4-(4,4,5,5-tetramethyl-1,3,2-dioxaborolan-2-yl)pent-4-enoate (**3ba**)

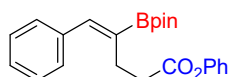

The title compound was prepared from the reaction of **1b** (13.0 mg, 0.10 mmol) and **2a** (44 $\mu$ l, 0.35 mmol) according to the General Procedure. It was purified by flash column chromatography on silica gel (35:1 petroleum ether/ethyl acetate) 22.9 mg (66% yield) a colorless oil.

**<sup>1</sup>H NMR (500 MHz, CDCl<sub>3</sub>)**  $\delta$  7.41-7.34 (m, 7H), 7.30-7.27 (m, 3H), 7.22 (t,  $J$  = 7.9 Hz, 1H), 7.07 (dd,  $J$  = 8.5, 1.0 Hz, 2H), 2.93-2.85 (m, 2H), 2.83-2.75 (m, 2H), 1.34 (s, 12H); **<sup>13</sup>C NMR (126 MHz, CDCl<sub>3</sub>)**  $\delta$  171.8, 150.8, 143.8, 137.3, 129.3, 128.9, 128.3, 127.4, 125.6, 121.6, 83.6, 34.2, 24.9, 24.8 (quaternary carbon next to boron could not be observed because of quadrupolar coupling effects); **HRMS (ESI)**: calcd. for C<sub>23</sub>H<sub>27</sub>BO<sub>4</sub> [M+Na]<sup>+</sup>: 401.1900, found 401.1903.

#### Phenyl (Z)-4-(4,4,5,5-tetramethyl-1,3,2-dioxaborolan-2-yl)-5-(*p*-tolyl)pent-4-enoate (**3ca**)

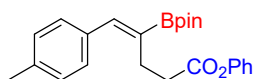

The title compound was prepared from the reaction of **1c** (14.4 mg, 0.10 mmol) and **2a** (44 $\mu$ l, 0.35 mmol) according to the General Procedure. It was purified by flash column chromatography on silica gel (40:1 petroleum ether/ethyl acetate) 27.8 mg (71% yield) a colorless oil.

**<sup>1</sup>H NMR (500 MHz, CDCl<sub>3</sub>)**  $\delta$  7.37 (t,  $J$  = 7.8 Hz, 2H), 7.33 (s, 1H), 7.28 (d,  $J$  = 7.9 Hz, 2H), 7.22 (t,  $J$  = 7.6 Hz, 1H), 7.18 (d,  $J$  = 8.0 Hz, 2H), 7.07 (d,  $J$  = 8.2 Hz, 2H), 2.95-2.84 (m, 2H), 2.83-2.73

(m, 21H), 2.36 (s, 3H), 1.34 (s, 12H);  $^{13}\text{C}$  NMR (126 MHz,  $\text{CDCl}_3$ )  $\delta$  171.8, 150.8, 143.8, 137.3, 134.4, 129.3, 129.0, 128.9, 125.6, 121.6, 83.6, 34.2, 24.9, 24.8, 21.2 (quaternary carbon next to boron could not be observed because of quadrupolar coupling effects); HRMS (ESI): calcd. for  $\text{C}_{24}\text{H}_{29}\text{BO}_4$   $[\text{M}+\text{Na}]^+$ : 415.2057, found 410.2057.

Phenyl (Z)-4-(4,4,5,5-tetramethyl-1,3,2-dioxaborolan-2-yl)-5-(*m*-tolyl)pent-4-enoate (**3da**)

The title compound was prepared from the reaction of **1d** (14.4 mg, 0.10 mmol) and **2a** (44  $\mu\text{l}$ , 0.35 mmol) according to the General Procedure. It was purified by

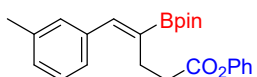

flash column chromatography on silica gel (40:1 petroleum ether/ethyl acetate) 35.6 mg (91% yield) a colorless oil.

$^1\text{H}$  NMR (500 MHz,  $\text{CDCl}_3$ )  $\delta$  7.37 (t,  $J = 7.8$  Hz, 2H), 7.34-7.26 (m, 3H), 7.25-7.18 (m, 3H), 7.07 (d,  $J = 7.8$  Hz, 2H), 2.91-2.84 (m, 2H), 2.82-2.75 (m, 2H), 2.50 (s, 3H), 1.34 (s, 12H);  $^{13}\text{C}$  NMR (126 MHz,  $\text{CDCl}_3$ )  $\delta$  171.8, 150.7, 143.1, 137.9, 134.0, 129.5, 129.3, 126.0, 125.6, 121.6, 83.6, 34.1, 25.0, 24.8, 15.5 (quaternary carbon next to boron could not be observed because of quadrupolar coupling effects); HRMS (ESI): calcd. for  $\text{C}_{24}\text{H}_{29}\text{BO}_4$   $[\text{M}+\text{Na}]^+$ : 415.2057, found 410.2056.

phenyl (Z)-4-(4,4,5,5-tetramethyl-1,3,2-dioxaborolan-2-yl)-5-(*o*-tolyl)pent-4-enoate (**3ea**)

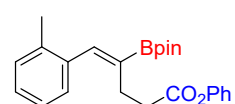

The title compound was prepared from the reaction of **1e** (14.4 mg, 0.10 mmol) and **2a** (44  $\mu\text{l}$ , 0.35 mmol) according to the General Procedure. It was purified by

flash column chromatography on silica gel (40:1 petroleum ether/ethyl acetate) 29.3 mg (75% yield) a colorless oil.

$^1\text{H}$  NMR (500 MHz,  $\text{CDCl}_3$ )  $\delta$  7.39 (s, 1H), 7.35 (t,  $J = 7.9$  Hz, 2H), 7.19 (dt,  $J = 7.7, 5.4$  Hz, 5H), 7.04 (d,  $J = 7.7$  Hz, 2H), 2.79-2.59 (m, 4H), 2.26 (s, 3H), 1.34 (s, 12H);  $^{13}\text{C}$  NMR (126 MHz,  $\text{CDCl}_3$ )  $\delta$  171.7, 150.7, 143.8, 136.8, 136.2, 129.9, 129.2, 128.6, 127.4, 125.6, 125.4, 121.6, 85.6, 83.5, 34.2, 25.0, 24.8, 19.9. (quaternary carbon next to boron could not be observed because of quadrupolar coupling effects); HRMS (ESI): calcd. for  $\text{C}_{24}\text{H}_{29}\text{BO}_4$   $[\text{M}+\text{H}]^+$ : 391.2086, found 391.2081.

Phenyl (Z)-5-(4-ethylphenyl)-4-(4,4,5,5-tetramethyl-1,3,2-dioxaborolan-2-yl)pent-4-enoate (**3fa**)

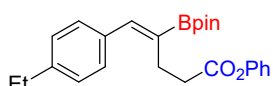

The title compound was prepared from the reaction of **1f** (15.8 mg, 0.10 mmol) and **2a** (44 $\mu$ l, 0.35 mmol) according to the General Procedure. It was purified by flash column chromatography on silica gel (35:1 petroleum ether/ethyl acetate) 30.9 mg (76% yield) a colorless oil.

**<sup>1</sup>H NMR (500 MHz, CDCl<sub>3</sub>)**  $\delta$  7.41-7.29 (m, 5H), 7.21 (t,  $J$  = 6.6 Hz, 3H), 7.07 (d,  $J$  = 7.6 Hz, 2H), 2.95-2.85 (m, 2H), 2.84-2.75 (m, 2H), 2.67 (q,  $J$  = 7.6 Hz, 2H), 1.34 (s, 12H), 1.26 (t,  $J$  = 7.7 Hz, 3H); **<sup>13</sup>C NMR (126 MHz, CDCl<sub>3</sub>)**  $\delta$  171.9, 150.8, 143.8, 143.6, 134.7, 129.3, 129.1, 127.8, 125.6, 121.6, 83.6, 34.2, 28.6, 24.9, 24.8, 15.4 (quaternary carbon next to boron could not be observed because of quadrupolar coupling effects); **HRMS (ESI)**: calcd. for C<sub>25</sub>H<sub>31</sub>BO<sub>4</sub> [M+Na]<sup>+</sup>: 429.2215, found 429.2215.

Phenyl (Z)-5-(4-isopropylphenyl)-4-(4,4,5,5-tetramethyl-1,3,2-dioxaborolan-2-yl)pent-4-enoate (**3ga**)

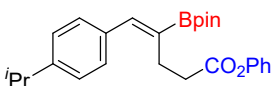

The title compound was prepared from the reaction of **1g** (17.2 mg, 0.10 mmol) and **2a** (44 $\mu$ l, 0.35 mmol) according to the General Procedure. It was purified by flash column chromatography on silica gel (40:1 petroleum ether/ethyl acetate) 33.6 mg (80% yield) a colorless oil.

**<sup>1</sup>H NMR (500 MHz, CDCl<sub>3</sub>)**  $\delta$  7.37 (t,  $J$  = 7.9 Hz, 1H), 7.32 (d,  $J$  = 8.4 Hz, 1H), 7.23 (d,  $J$  = 7.9 Hz, 1H), 7.07 (d,  $J$  = 7.6 Hz, 1H), 2.96-2.84 (m, 1H), 2.84-2.74 (m, 1H), 1.34 (s, 6H), 1.27 (d,  $J$  = 6.9 Hz, 3H), 1.22 (t,  $J$  = 7.2 Hz, 1H); **<sup>13</sup>C NMR (126 MHz, CDCl<sub>3</sub>)**  $\delta$  171.9, 150.8, 148.2, 143.8, 134.8, 129.3, 129.1, 126.4, 125.6, 121.6, 83.6, 34.3, 33.8, 25.0, 24.8, 23.9 (quaternary carbon next to boron could not be observed because of quadrupolar coupling effects); **HRMS (ESI)**: calcd. for C<sub>26</sub>H<sub>33</sub>BO<sub>4</sub> [M+Na]<sup>+</sup>: 443.2372, found 443.2371.

Phenyl (Z)-5-(4-(tert-butyl)phenyl)-4-(4,4,5,5-tetramethyl-1,3,2-dioxaborolan-2-yl)pent-4-enoate (**3ha**)

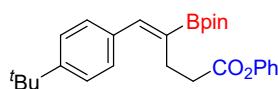

The title compound was prepared from the reaction of **1h** (18.6 mg, 0.10 mmol) and **2a** (44 $\mu$ l, 0.35 mmol) according to the General Procedure. It was purified by flash column chromatography on silica gel (40:1 petroleum ether/ethyl acetate) 36.0 mg (83% yield) a colorless oil.

**<sup>1</sup>H NMR (500 MHz, CDCl<sub>3</sub>)** δ 7.43-7.35 (m, 4H), 7.35-7.30 (m, 3H), 7.23 (t, *J* = 7.4 Hz, 1H), 7.08 (dd, *J* = 8.5, 0.9 Hz, 2H), 2.95-2.86 (m, 2H), 2.84-2.74 (m, 2H), 1.34 (s, 12H); **<sup>13</sup>C NMR (126 MHz, CDCl<sub>3</sub>)** δ 171.9, 150.8, 150.4, 143.7, 134.4, 129.3, 128.8, 125.6, 125.2, 121.6, 83.6, 34.6, 34.3, 31.3, 25.0, 24.8(quaternary carbon next to boron could not be observed because of quadrupolar coupling effects); **HRMS (ESI)**: calcd. for C<sub>27</sub>H<sub>35</sub>BO<sub>4</sub> [M+Na]<sup>+</sup>: 457.2529, found 457.2528.

Phenyl (Z)-5-([1,1'-biphenyl]-4-yl)-4-(4,4,5,5-tetramethyl-1,3,2-dioxaborolan-2-yl)pent-4-enoate (**3ia**)

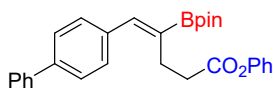

The title compound was prepared from the reaction of **1i** (20.6 mg, 0.10 mmol) and **2a** (44μl, 0.35 mmol) according to the General Procedure. It was purified by flash column chromatography on silica gel (40:1 petroleum ether/ethyl acetate) 40.4 mg (89% yield) a colorless oil.

**<sup>1</sup>H NMR (500 MHz, CDCl<sub>3</sub>)** δ 7.62 (t, *J* = 7.1 Hz, 4H), 7.50-7.42 (m, 4H), 7.40-7.34 (m, 4H), 7.22 (t, *J* = 7.4 Hz, 1H), 7.08 (d, *J* = 8.6 Hz, 4H), 2.98-2.90 (m, 2H), 2.89-2.77 (m, 2H), 1.36 (s, 12H); **<sup>13</sup>C NMR (126 MHz, CDCl<sub>3</sub>)** δ 171.8, 150.8, 143.3, 140.6, 140.1, 136.3, 129.5, 129.3, 128.8, 127.3, 127.0, 126.9, 125.6, 121.6, 83.7, 34.2, 25.0, 24.8(quaternary carbon next to boron could not be observed because of quadrupolar coupling effects); **HRMS (ESI)**: calcd. for C<sub>29</sub>H<sub>31</sub>BO<sub>4</sub> [M+Na]<sup>+</sup>: 477.2217, found 477.2216.

Pphenyl (Z)-5-(4-methoxyphenyl)-4-(4,4,5,5-tetramethyl-1,3,2-dioxaborolan-2-yl)pent-4-enoate(**3ja**)

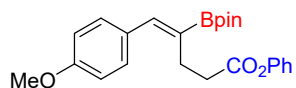

The title compound was prepared from the reaction of **1j** (16.0 mg, 0.10 mmol) and **2a** (44μl, 0.35 mmol) according to the General Procedure. It was purified by flash column chromatography on silica gel (15:1 petroleum ether/ethyl acetate) 27.7 mg (68% yield) a colorless oil.

**<sup>1</sup>H NMR (500 MHz, CDCl<sub>3</sub>)** δ 7.40-7.33 (m, 4H), 7.30 (s, 1H), 7.23 (t, *J* = 7.5 Hz, 1H), 7.08 (d, *J* = 7.8 Hz, 2H), 6.91 (d, *J* = 8.7 Hz, 2H), 3.83 (s, 3H), 2.98-2.86 (m, 2H), 2.84-2.76 (m, 2H), 1.33 (s, 12H); **<sup>13</sup>C NMR (126 MHz, CDCl<sub>3</sub>)** δ 171.9, 158.9, 150.8, 143.3, 130.5, 129.9, 129.3, 125.6, 121.6, 113.7, 83.5, 55.2, 34.2, 24.9, 24.8(quaternary carbon next to boron could not be observed because of

quadrupolar coupling effects); **HRMS (ESI)**: calcd. for  $C_{24}H_{29}BO_5$   $[M+Na]^+$ : 431.2007, found 431.2005.

Pphenyl (Z)-5-(4-(benzyloxy)phenyl)-4-(4,4,5,5-tetramethyl-1,3,2-dioxaborolan-2-yl)pent-4-enoate  
**(3ka)**

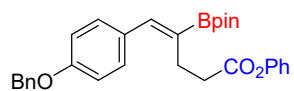

The title compound was prepared from the reaction of **1k** (23.6 mg, 0.10 mmol) and **2a** (44  $\mu$ l, 0.35 mmol) according to the General Procedure. It was purified by flash column chromatography on silica gel (35:1 petroleum ether/ethyl acetate) 36.8 mg (76% yield) a colorless oil.

**$^1H$  NMR (500 MHz,  $CDCl_3$ )**  $\delta$  7.46 (d,  $J = 7.1$  Hz, 2H), 7.41 (t,  $J = 8.0$  Hz, 3H), 7.36 (dd,  $J = 11.1$ , 4.5 Hz, 5H), 7.30 (s, 1H), 7.23 (t,  $J = 7.4$  Hz, 1H), 7.08 (d,  $J = 7.6$  Hz, 2H), 6.98 (d,  $J = 8.7$  Hz, 2H), 5.09 (s, 2H), 2.98-2.87 (m, 2H), 2.85-2.75 (m, 2H), 1.34 (s, 12H);  **$^{13}C$  NMR (126 MHz,  $CDCl_3$ )**  $\delta$  171.9, 158.1, 150.8, 143.3, 136.8, 130.5, 130.2, 129.3, 128.6, 128.0, 127.5, 125.6, 121.6, 114.6, 83.5, 69.9, 34.2, 24.9, 24.8 (quaternary carbon next to boron could not be observed because of quadrupolar coupling effects); **HRMS (ESI)**: calcd. for  $C_{30}H_{33}BO_5$   $[M+Na]^+$ : 507.2323, found 507.2322.

Phenyl (Z)-5-(4-(methylthio)phenyl)-4-(4,4,5,5-tetramethyl-1,3,2-dioxaborolan-2-yl)pent-4-enoate  
**(3la)**

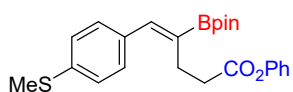

The title compound was prepared from the reaction of **1l** (17.6 mg, 0.10 mmol) and **2a** (44  $\mu$ l, 0.35 mmol) according to the General Procedure. It was purified by flash column chromatography on silica gel (35:1 petroleum ether/ethyl acetate) 34.3 mg (81% yield) a colorless oil.

**$^1H$  NMR (500 MHz,  $CDCl_3$ )**  $\delta$  7.37 (t,  $J = 7.7$  Hz, 2H), 7.34-7.29 (m, 3H), 7.24 (d,  $J = 8.3$  Hz, 3H), 7.07 (d,  $J = 8.2$  Hz, 2H), 2.94-2.84 (m, 2H), 2.83-2.73 (m, 2H), 2.50 (s, 3H), 1.34 (s, 12H);  **$^{13}C$  NMR (126 MHz,  $CDCl_3$ )**  $\delta$  171.8, 150.7, 143.1, 137.9, 134.0, 129.5, 129.3, 126.0, 125.6, 121.6, 83.6, 34.1, 25.0, 24.8, 15.5 (quaternary carbon next to boron could not be observed because of quadrupolar coupling effects); **HRMS (ESI)**: calcd. for  $C_{24}H_{29}BO_4S$   $[M+Na]^+$ : 447.1779, found 447.1778.

Phenyl (Z)-4-(4,4,5,5-tetramethyl-1,3,2-dioxaborolan-2-yl)-5-(2,4,6-trimethoxyphenyl)pent-4-enoate  
(**3ma**)

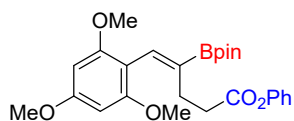

The title compound was prepared from the reaction of **1m** (22.0 mg, 0.10 mmol) and **2a** (44 $\mu$ l, 0.35 mmol) according to the General Procedure. It was purified by flash column chromatography on silica gel (5:1 petroleum ether/ethyl acetate) 33.7 mg (72% yield) a colorless oil.

**<sup>1</sup>H NMR (500 MHz, CDCl<sub>3</sub>)**  $\delta$  7.36 (t,  $J$  = 7.9 Hz, 2H), 7.21 (t,  $J$  = 7.4 Hz, 1H), 7.10-7.00 (m, 3H), 6.14 (s, 2H), 3.84 (s, 3H), 3.79 (s, 6H), 2.86-2.67 (m, 2H), 2.56-2.45 (m, 2H), 1.33 (s, 12H); **<sup>13</sup>C NMR (126 MHz, CDCl<sub>3</sub>)**  $\delta$  172.5, 160.8, 158.3, 150.9, 135.7, 129.2, 125.5, 121.7, 107.8, 90.2, 83.3, 55.5, 55.3, 33.7, 27.3, 24.9 (quaternary carbon next to boron could not be observed because of quadrupolar coupling effects); **HRMS (ESI)**: calcd. for C<sub>26</sub>H<sub>33</sub>BO<sub>7</sub> [M+Na]<sup>+</sup>: 491.2219, found 491.2218.

Phenyl (Z)-4-(4,4,5,5-tetramethyl-1,3,2-dioxaborolan-2-yl)-5-(2,4,6-trimethoxyphenyl)pent-4-enoate  
(**3na**)

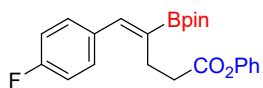

The title compound was prepared from the reaction of **1n** (14.8 mg, 0.10 mmol) and **2a** (44 $\mu$ l, 0.35 mmol) according to the General Procedure. It was purified by flash column chromatography on silica gel (35:1 petroleum ether/ethyl acetate) 37.2 mg (94% yield) a colorless oil.

**<sup>1</sup>H NMR (500 MHz, CDCl<sub>3</sub>)**  $\delta$  7.41-7.32 (m, 4H), 7.31 (s, 1H), 7.23 (t,  $J$  = 7.4 Hz, 1H), 7.10-6.99 (m, 4H), 2.89-2.82 (m, 2H), 2.79 (ddd,  $J$  = 9.0, 5.2, 1.8 Hz, 2H), 1.34 (s, 12H); **<sup>13</sup>C NMR (126 MHz, CDCl<sub>3</sub>)**  $\delta$  171.7, 161.9 (d,  $J_{(C-F)}$  = 247.8 Hz), 150.7, 142.6, 130.7 (d,  $J_{(C-F)}$  = 8.1 Hz), 129.3, 125.7, 121.6, 115.3, 115.2, 83.7, 34.1, 24.8 (quaternary carbon next to boron could not be observed because of quadrupolar coupling effects); **<sup>19</sup>F NMR (471 MHz, CDCl<sub>3</sub>)**  $\delta$  -114.1; **HRMS (ESI)**: calcd. for C<sub>23</sub>H<sub>26</sub>BFO<sub>4</sub> [M+Na]<sup>+</sup>: 419.1806, found 419.1805.

Phenyl(Z)-2-(1-(4-chlorophenyl)-5-(phenylperoxy)-5H-pent-1-en-2-yl)-4,4,5,5-tetramethyl-1,3,2-dioxaborolane (**3oa**)



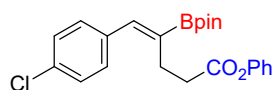

The title compound was prepared from the reaction of **1o** (16.5 mg, 0.10 mmol) and **2a** (44 $\mu$ l, 0.35 mmol) according to the General Procedure. It was purified by flash column chromatography on silica gel (35:1 petroleum ether/ethyl acetate) 33.0 mg (80% yield) a colorless oil.

**<sup>1</sup>H NMR (500 MHz, CDCl<sub>3</sub>)**  $\delta$  7.41-7.36 (m, 2H), 7.33 (d,  $J$  = 8.6 Hz, 2H), 7.30 (d,  $J$  = 2.1 Hz, 3H), 7.23 (t,  $J$  = 7.4 Hz, 1H), 7.06 (d,  $J$  = 7.6 Hz, 2H), 2.84 (dd,  $J$  = 11.2, 4.8 Hz, 2H), 2.80-2.74 (m, 2H), 1.34 (s, 12H); **<sup>13</sup>C NMR (126 MHz, CDCl<sub>3</sub>)**  $\delta$  171.7, 150.7, 142.4, 135.7, 133.2, 130.2, 129.3, 128.5, 125.67, 121.6, 83.7, 34.0, 24.9, 24.8 (quaternary carbon next to boron could not be observed because of quadrupolar coupling effects); **HRMS (ESI)**: calcd. for C<sub>23</sub>H<sub>26</sub>BClO<sub>4</sub> [M+Na]<sup>+</sup>: 435.1514, found 435.1514.

Phenyl(*Z*)-4-(4,4,5,5-tetramethyl-1,3,2-dioxaborolan-2-yl)-5-(4-(trifluoromethyl)phenyl)pent-4-enoate (**3pa**)

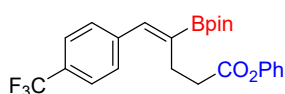

The title compound was prepared from the reaction of **1p** (19.8 mg, 0.10 mmol) and **2a** (44 $\mu$ l, 0.35 mmol) according to the General Procedure. It was purified by flash column chromatography on silica gel (40:1 petroleum ether/ethyl acetate) 19.6 mg (44% yield) a colorless oil.

**<sup>1</sup>H NMR (500 MHz, CDCl<sub>3</sub>)**  $\delta$  7.62 (d,  $J$  = 8.2 Hz, 2H), 7.45 (d,  $J$  = 8.1 Hz, 2H), 7.37 (dd,  $J$  = 9.3, 6.5 Hz, 3H), 7.23 (t,  $J$  = 7.4 Hz, 1H), 7.07-7.01 (m, 2H), 2.93-2.65 (m, 4H), 1.35 (s, 12H); **<sup>13</sup>C NMR (126 MHz, CDCl<sub>3</sub>)**  $\delta$  171.6, 150.7, 142.2, 140.9, 129.3, 129.1, 125.7, 125.2 (d,  $J_{(C-F)}$  = 3.8 Hz), 122.2 (d,  $J_{(C-F)}$  = 200.8 Hz), 121.5, 83.9, 34.0, 24.91, 24.8 (quaternary carbon next to boron could not be observed because of quadrupolar coupling effects); **<sup>19</sup>F NMR (471 MHz, CDCl<sub>3</sub>)**  $\delta$  -62.5; **HRMS (ESI)**: calcd. for C<sub>24</sub>H<sub>26</sub>B<sub>F</sub>3O<sub>4</sub> [M+Na]<sup>+</sup>: 419.1806, found 419.1805.

Phenyl (*Z*)-5-(4-cyanophenyl)-4-(4,4,5,5-tetramethyl-1,3,2-dioxaborolan-2-yl)pent-4-enoate (**3qa**)

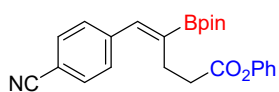

The title compound was prepared from the reaction of **1q** (15.5 mg, 0.10 mmol) and **2a** (44 $\mu$ l, 0.35 mmol) according to the General Procedure. It was purified by flash column chromatography on silica gel (25:1 petroleum ether/ethyl acetate) 33.0 mg (82% yield) a colorless oil.

**<sup>1</sup>H NMR (500 MHz, CDCl<sub>3</sub>)** δ 7.65 (d, *J* = 8.3 Hz, 2H), 7.44 (d, *J* = 8.1 Hz, 2H), 7.40-7.34 (m, 2H), 7.33 (s, 1H), 7.23 (t, *J* = 7.4 Hz, 1H), 7.05 (d, *J* = 7.6 Hz, 2H), 2.81 (s, 4H), 1.34 (s, 12H); **<sup>13</sup>C NMR (126 MHz, CDCl<sub>3</sub>)** δ 171.5, 150.6, 142.0, 141.6, 132.1, 129.4, 129.4, 125.8, 121.5, 118.9, 110.8, 84.0, 33.8, 25.0, 24.8(quaternary carbon next to boron could not be observed because of quadrupolar coupling effects); **HRMS (ESI)**: calcd. for C<sub>24</sub>H<sub>26</sub>BNO<sub>4</sub> [M+Na]<sup>+</sup>: 426.1854, found 426.1854.

Phenyl (Z)-4-(4,4,5,5-tetramethyl-1,3,2-dioxaborolan-2-yl)-5-(thiophen-3-yl)pent-4-enoate (**3ra**)

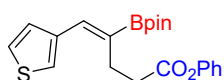

The title compound was prepared from the reaction of **1r** (13.6 mg, 0.10 mmol) and **2a** (44μl, 0.35 mmol) according to the General Procedure. It was purified by flash column chromatography on silica gel (30:1 petroleum ether/ethyl acetate) 26.9 mg (70% yield) a colorless oil.

**<sup>1</sup>H NMR (500 MHz, CDCl<sub>3</sub>)** δ 7.43 (d, *J* = 2.6 Hz, 1H), 7.38 (t, *J* = 7.9 Hz, 2H), 7.32 (dd, *J* = 5.0, 2.9 Hz, 1H), 7.29 (s, 1H), 7.27-7.24 (m, 1H), 7.23 (s, 1H), 7.09 (d, *J* = 7.7 Hz, 2H), 2.99-2.87 (m, 2H), 2.86-2.75 (m, 2H), 1.33 (s, 12H); **<sup>13</sup>C NMR (126 MHz, CDCl<sub>3</sub>)** δ 171.9, 150.7, 138.5, 137.4, 129.3, 128.8, 125.7, 125.4, 125.4, 121.6, 83.6, 33.9, 25.4, 24.8(quaternary carbon next to boron could not be observed because of quadrupolar coupling effects); **HRMS (ESI)**: calcd. for C<sub>21</sub>H<sub>25</sub>BO<sub>4</sub>S [M+Na]<sup>+</sup>: 407.1464, found 407.1463.

Phenyl (Z)-5-(benzofuran-5-yl)-4-(4,4,5,5-tetramethyl-1,3,2-dioxaborolan-2-yl)pent-4-enoate (**3sa**)

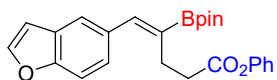

The title compound was prepared from the reaction of **1s** (17.0 mg, 0.10 mmol) and **2a** (44μl, 0.35 mmol) according to the General Procedure. It was purified by flash column chromatography on silica gel (35:1 petroleum ether/ethyl acetate) 31.4 mg (75% yield) a colorless oil.

**<sup>1</sup>H NMR (500 MHz, CDCl<sub>3</sub>)** δ 7.66-7.61 (m, 2H), 7.51-7.45 (m, 2H), 7.37 (t, *J* = 7.9 Hz, 2H), 7.31 (dd, *J* = 8.6, 1.5 Hz, 1H), 7.22 (t, *J* = 7.4 Hz, 1H), 7.06 (d, *J* = 7.6 Hz, 2H), 6.77 (dd, *J* = 2.0, 0.5 Hz, 1H), 2.97-2.90 (m, 2H), 2.87-2.76 (m, 2H), 1.35 (s, 12H); **<sup>13</sup>C NMR (126 MHz, CDCl<sub>3</sub>)** δ 171.8, 154.2, 145.4, 144.1, 132.2, 129.3, 129.2, 127.4, 125.7, 125.6, 121.6, 121.5, 111.1, 106.8, 83.6, 34.2, 24.9, 24.8(quaternary carbon next to boron could not be observed because of quadrupolar coupling effects); **HRMS (ESI)**: calcd. for C<sub>25</sub>H<sub>27</sub>BO<sub>5</sub> [M+K]<sup>+</sup>: 457.1591, found 457.1583.

Phenyl (Z)-5-(naphthalen-1-yl)-4-(4,4,5,5-tetramethyl-1,3,2-dioxaborolan-2-yl)pent-4-enoate (**3ta**)

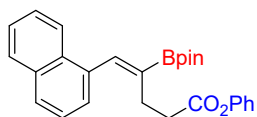

The title compound was prepared from the reaction of **1t** (18.0 mg, 0.10 mmol) and **2a** (44 $\mu$ l, 0.35 mmol) according to the General Procedure. It was purified by flash column chromatography on silica gel (35:1 petroleum ether/ethyl acetate) 14.6 mg (34% yield) a colorless oil.

**<sup>1</sup>H NMR (500 MHz, CDCl<sub>3</sub>)**  $\delta$  7.98 (dd,  $J$  = 6.4, 2.6 Hz, 1H), 7.87 (dd,  $J$  = 6.2, 3.1 Hz, 1H), 7.84-7.77 (m, 2H), 7.55-7.44 (m, 3H), 7.37 (d,  $J$  = 7.0 Hz, 1H), 7.31 (t,  $J$  = 7.9 Hz, 2H), 7.18 (t,  $J$  = 7.4 Hz, 1H), 6.97 (d,  $J$  = 8.2 Hz, 2H), 2.71 (s, 4H), 1.39 (s, 12H); **<sup>13</sup>C NMR (126 MHz, CDCl<sub>3</sub>)**  $\delta$  171.7, 150.7, 142.7, 134.8, 133.5, 131.5, 129.2, 128.3, 127.7, 126.0, 125.9, 125.8, 125.5, 125.3, 125.26, 121.6, 83.7, 34.3, 25.4, 24.9 (quaternary carbon next to boron could not be observed because of quadrupolar coupling effects); **HRMS (ESI)**: calcd. for C<sub>27</sub>H<sub>29</sub>BO<sub>4</sub> [M+Na]<sup>+</sup>: 451.2059, found 451.2058.

Phenyl (Z)-5-(Ferrocenyl)-4-(4,4,5,5-tetramethyl-1,3,2-dioxaborolan-2-yl)pent-4-enoate (**3ua**)

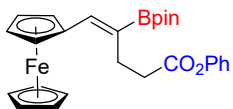

The title compound was prepared from the reaction of **1u** (23.8 mg, 0.10 mmol) and **2a** (44 $\mu$ l, 0.35 mmol) according to the General Procedure. It was purified by flash column chromatography on silica gel (35:1 petroleum ether/ethyl acetate) 27.8 mg (56% yield) a yellow solid.

**<sup>1</sup>H NMR (500 MHz, DMSO)**  $\delta$  7.42 (t,  $J$  = 6.9 Hz, 2H), 7.25 (t,  $J$  = 7.3 Hz, 1H), 7.18-7.07 (m, 2H), 6.94 (s, 1H), 4.53 (s, 2H), 4.37 (d,  $J$  = 7.3 Hz, 3H), 4.12 (s, 5H), 2.76-2.68 (m, 2H), 2.68-2.62 (m, 2H), 1.24 (s, 12H); **<sup>13</sup>C NMR (126 MHz, DMSO)**  $\delta$  172.3, 151.5, 143.3, 130.4, 126.8, 122.8, 84.1, 81.1, 70.9, 70.6, 70.1, 34.4, 26.2, 25.6 (quaternary carbon next to boron could not be observed because of quadrupolar coupling effects); **HRMS (ESI)**: calcd. for C<sub>27</sub>H<sub>31</sub>BFeO<sub>4</sub> [M+Na]<sup>+</sup>: 509.1569, found 509.1566.

Phenyl 5,5-diphenyl-4-(4,4,5,5-tetramethyl-1,3,2-dioxaborolan-2-yl)pent-4-enoate (**3va**)

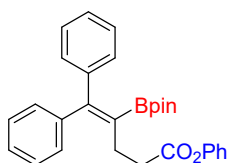

The title compound was prepared from the reaction of **1v** (18.0 mg, 0.10 mmol) and **2a** (44 $\mu$ l, 0.35 mmol) according to the General Procedure. It was purified by flash

column chromatography on silica gel (35:1 petroleum ether/ethyl acetate) 10.9 mg (24% yield) a colorless oil.

**<sup>1</sup>H NMR (500 MHz, CDCl<sub>3</sub>)**  $\delta$  7.35 (dt,  $J$  = 15.2, 7.7 Hz, 4H), 7.24 (dd,  $J$  = 13.8, 9.0 Hz, 7H), 7.18 (d,  $J$  = 7.1 Hz, 2H), 7.07 (d,  $J$  = 7.8 Hz, 2H), 2.85-2.47 (m, 4H), 1.17 (s, 12H); **<sup>13</sup>C NMR (126 MHz, CDCl<sub>3</sub>)**  $\delta$  171.5, 153.1, 150.7, 144.2, 141.7, 129.3, 129.2, 129.0, 128.2, 127.7, 127.2, 127.0, 125.6, 121.6, 83.5, 34.5, 28.4, 24.7 (quaternary carbon next to boron could not be observed because of quadrupolar coupling effects); **HRMS (ESI)**: calcd. for C<sub>29</sub>H<sub>31</sub>BO<sub>4</sub> [M+Na]<sup>+</sup>: 477.2217, found 477.2215.

## 6. Derivatization Experiments

### 6.1 Mechanism Exploration

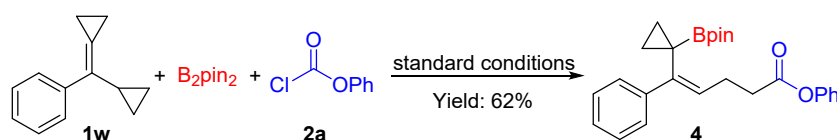

**4** was prepared according to the following procedure. An oven-dried 15 mL sealed tube was loaded with (cyclopropyl(cyclopropylidene)methyl)benzene (0.10 mmol, 17 mg), B<sub>2</sub>pin<sub>2</sub> (0.15 mmol, 38.1 mg), 2a (0.35 mmol, 44  $\mu$ l), IMesCuCl (0.005 mmol, 2.1 mg), BINAP (0.075 mmol, 4.7 mg) and LiO<sup>t</sup>Bu (0.35 mmol, 28 mg), then toluene (1 mL) was added. The reaction mixture was stirred at 100 °C for the 12 h. After dilution with EtOAc, the reaction mixture was filtrated on silica (EtOAc) and concentrated under reduced pressure. After a flash column chromatography (*n*-hexane/EtOAc 30:1) afforded the product **4** (25.9 mg, 62% yield) as a colorless oil.

**<sup>1</sup>H NMR (500 MHz, CDCl<sub>3</sub>)**  $\delta$  7.42-7.38 (m, 2H), 7.37-7.34 (m, 2H), 7.27 (dd,  $J$  = 13.9, 11.4 Hz, 4H), 7.21 (dd,  $J$  = 15.0, 7.8 Hz, 1H), 7.14-7.07 (m, 2H), 5.97-5.83 (m, 1H), 2.94-2.63 (m, 4H), 1.28 (s, 12H), 1.20 (dd,  $J$  = 6.0, 3.4 Hz, 2H), 0.63 (q,  $J$  = 3.5 Hz, 2H); **<sup>13</sup>C NMR (126 MHz, CDCl<sub>3</sub>)**  $\delta$  172.0, 150.7, 144.1, 143.2, 129.4, 129.2, 127.8, 126.5, 126.3, 125.7, 121.6, 83.6, 34.1, 24.8, 24.6, 15.5; **HRMS (ESI)**: calcd. for C<sub>26</sub>H<sub>31</sub>BO<sub>4</sub> [M+Na]<sup>+</sup>: 441.2215, found 441.2216.

### 6.2 Oxidation of the **3ap**<sup>[3]</sup>

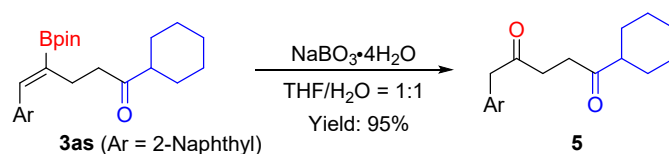

**5** was prepared according to a modified procedure. To a solution of **3as** (0.1 mmol, 41.8 mg) in THF/H<sub>2</sub>O=1:1 was added NaBO<sub>3</sub>·4H<sub>2</sub>O (0.5 mmol, 76.9mg) and the mixture was vigorously stirred at room temperature for 5 h. The reaction was quenched with water and NH<sub>4</sub>Cl(sat) were added and the layers were separated. After extraction with EtOAc, the organic layers were dried over Na<sub>2</sub>SO<sub>4</sub> and concentrated under reduced pressure. After a flash column chromatography (*n*-hexane/EtOAc 30:1) afforded the product **5** (29.3mg, 95% yield) as a colorless oil.

**<sup>1</sup>H NMR (500 MHz, CDCl<sub>3</sub>)**  $\delta$  7.83 (dt, *J* = 9.3, 5.2 Hz, 3H), 7.70 (s, 1H), 7.53-7.44 (m, 2H), 7.35 (dd, *J* = 8.4, 1.6 Hz, 1H), 3.93 (s, 2H), 2.78-2.74 (m, 2H), 2.74-2.69 (m, 2H), 2.38 (tt, *J* = 11.3, 3.4 Hz, 1H), 1.87 (d, *J* = 13.0 Hz, 2H), 1.82-1.73 (m, 2H), 1.68 (dd, *J* = 6.9, 5.0 Hz, 1H), 1.42-1.10 (m, 6H); **<sup>13</sup>C NMR (126 MHz, CDCl<sub>3</sub>)**  $\delta$  212.5, 207.2, 133.5, 132.4, 131.7, 128.3, 128.2, 127.6, 127.6, 127.5, 126.1, 125.7, 50.6, 50.2, 35.5, 34.1, 28.5, 25.8, 25.6; **HRMS (ESI):** calcd. for C<sub>21</sub>H<sub>24</sub>O<sub>2</sub> [M+Na]<sup>+</sup>: 331.1671, found 331.1673.

### 6.3 Synthesis of potassium salt.<sup>[3]</sup>

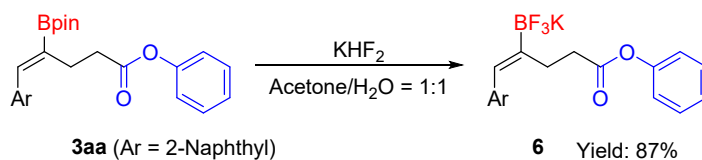

**6** was prepared according to a modified procedure. The solution of compound **3aa** (85.6 mg, 0.2 mmol) and KHF<sub>2</sub> (5.1 equiv, 79.7 mg) in acetone: H<sub>2</sub>O (1 mL: 1 mL) was stirred at 0 °C for 10 h. Then the reaction was determined by TLC analysis. After the **3aa** was consumed completely, the reaction mixture was concentrated. The crude product was dissolved in MeOH, and evaporate again. Then the solids were triturated with hot acetone and filtered to remove inorganic salts. The resulting filtrate was concentrated to a minimal volume and EtOAc was added to afford **6** (35.5 mg, 87% yield) as a white solid.

**<sup>1</sup>H NMR (500 MHz, DMSO)**  $\delta$  8.24 (dd, *J* = 11.6, 5.5 Hz, 3H), 8.11 (s, 1H), 7.90-7.73 (m, 5H), 7.64 (t, *J* = 7.9 Hz, 1H), 7.55-7.41 (m, 2H), 7.07 (s, 1H), 3.24-3.16 (m, 2H), 3.11-2.99 (m, 2H); **<sup>13</sup>C NMR (126 MHz, DMSO)**  $\delta$  173.4, 151.7, 138.8, 134.2, 132.1, 130.4, 128.8, 128.6, 128.3, 128.2, 127.0, 126.8, 126.6, 126.0, 122.9, 34.8, 16.2; **HRMS (ESI):** calcd. for C<sub>21</sub>H<sub>17</sub>BF<sub>3</sub>KO<sub>2</sub> [M+Na]<sup>+</sup>: 431.0808, found 431.0810.

#### 6.4 Suzuki coupling of the **3aa**<sup>[3]</sup>

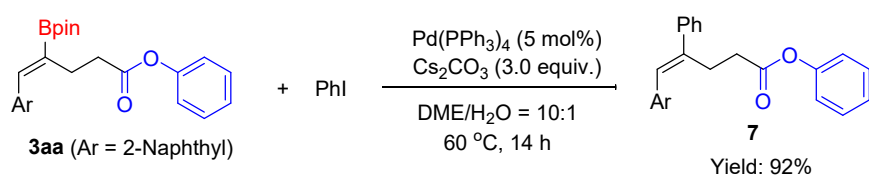

**7** was prepared according to a modified procedure. A flame-dried Schlenk was loaded with Pd(PPh<sub>3</sub>)<sub>4</sub> (0.005 mmol, 5.8 mg), iodobenzene (0.13 mmol, 20  $\mu$ l) and Cs<sub>2</sub>CO<sub>3</sub> (0.3 mmol, 97.8 mg). After 3 vacuum/argon cycles, dried and degassed DME or Dioxane (0.3 mL) was added, followed by vinylboron **3aa** (0.1 mmol, 42.8 mg) in solution in DME (0.2 mL), then, the water (60 $\mu$ l) was added followed. The reaction mixture was stirred at 60 °C for the 12 h. After dilution with EtOAc, the reaction mixture was filtrated on silica (EtOAc) and concentrated under reduced pressure. After a flash column chromatography (*n*-hexane/EtOAc 35:1) afforded the product **7** (58 mg, 76% yield) as a colorless oil.

**<sup>1</sup>H NMR (500 MHz, CDCl<sub>3</sub>)**  $\delta$  7.87 (dd, *J* = 12.0, 5.0 Hz, 4H), 7.57 (d, *J* = 7.2 Hz, 2H), 7.55-7.49 (m, 3H), 7.45 (t, *J* = 7.6 Hz, 2H), 7.40-7.32 (m, 3H), 7.22 (t, *J* = 7.4 Hz, 1H), 6.99 (dd, *J* = 9.8, 2.1 Hz, 3H), 3.38-3.22 (m, 2H), 2.76-2.64 (m, 2H); **<sup>13</sup>C NMR (126 MHz, CDCl<sub>3</sub>)**  $\delta$  171.4, 150.6, 141.9, 141.0, 135.1, 133.4, 132.3, 129.8, 129.3, 128.7, 128.0, 128.0, 127.7, 127.6, 127.4, 127.1, 126.8, 126.2, 125.9, 125.7, 121.5, 33.4, 25.7; **HRMS (ESI)**: calcd. for C<sub>27</sub>H<sub>22</sub>O<sub>2</sub> [M+Na]<sup>+</sup>: 401.1517, found 401.1522.

## 7. References

- (1) J. Yang, Y.-Y. Liu, R.-J. Song, Z.-H. Peng, J.-H. Li, *Adv. Synth. Catal.* **2016**, *358*, 2286–2292.
- (2) Z.-Z. Zhu, K. Chen, L.-Z. Yu, X.-Y. Tang, M. Shi, *Org. Lett.* **2015**, *17*, 5994–5997.
- (3) J. Han, W. Zhou, P.-C. Zhang, H. Wang, H.-H. Wu, H. Zhang, *ACS Catal.* **2019**, *9*, 6890–6895.

## 8. Copy of <sup>1</sup>H, and <sup>13</sup>CNMR Spectra of Products

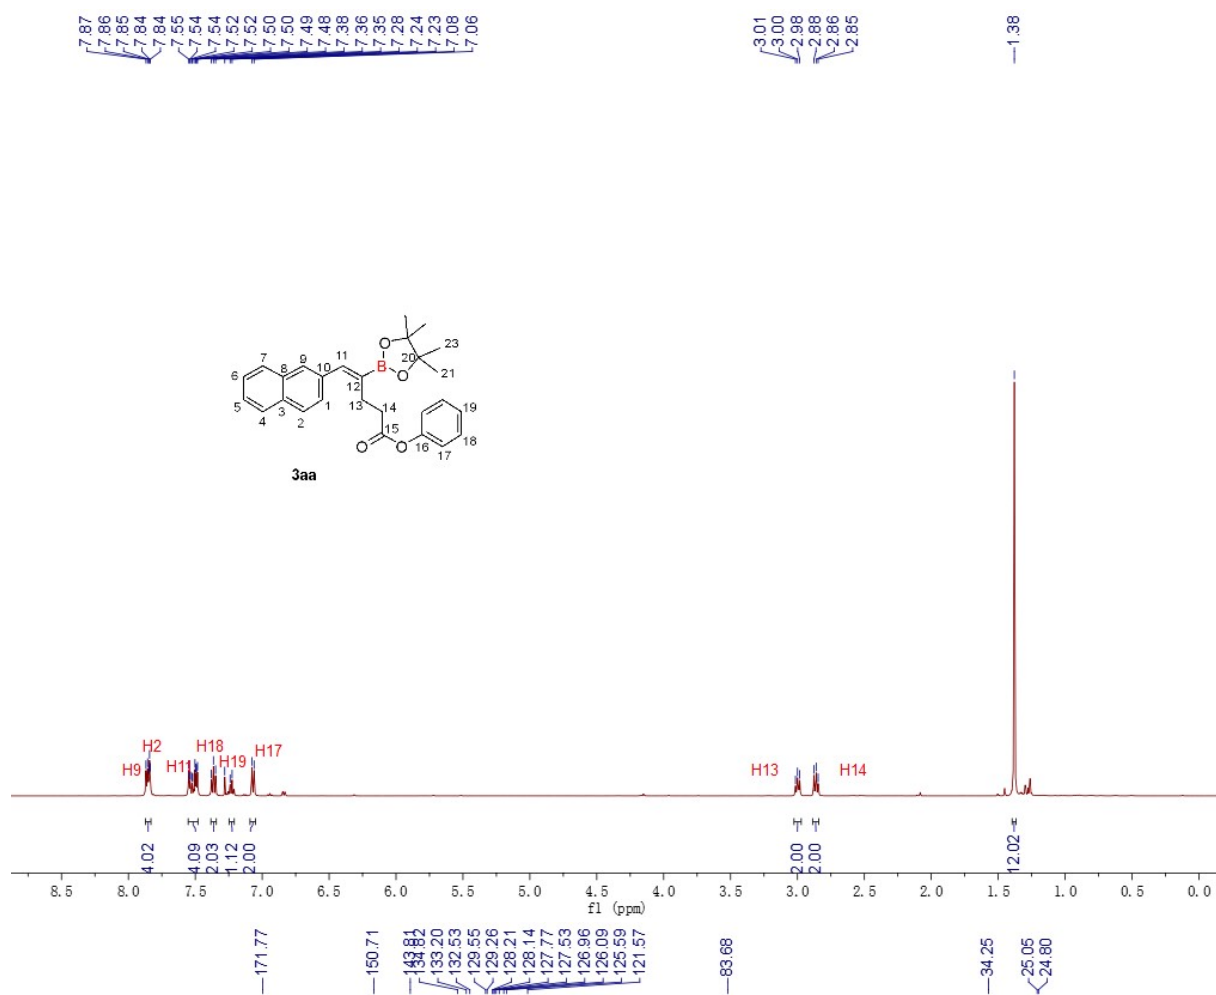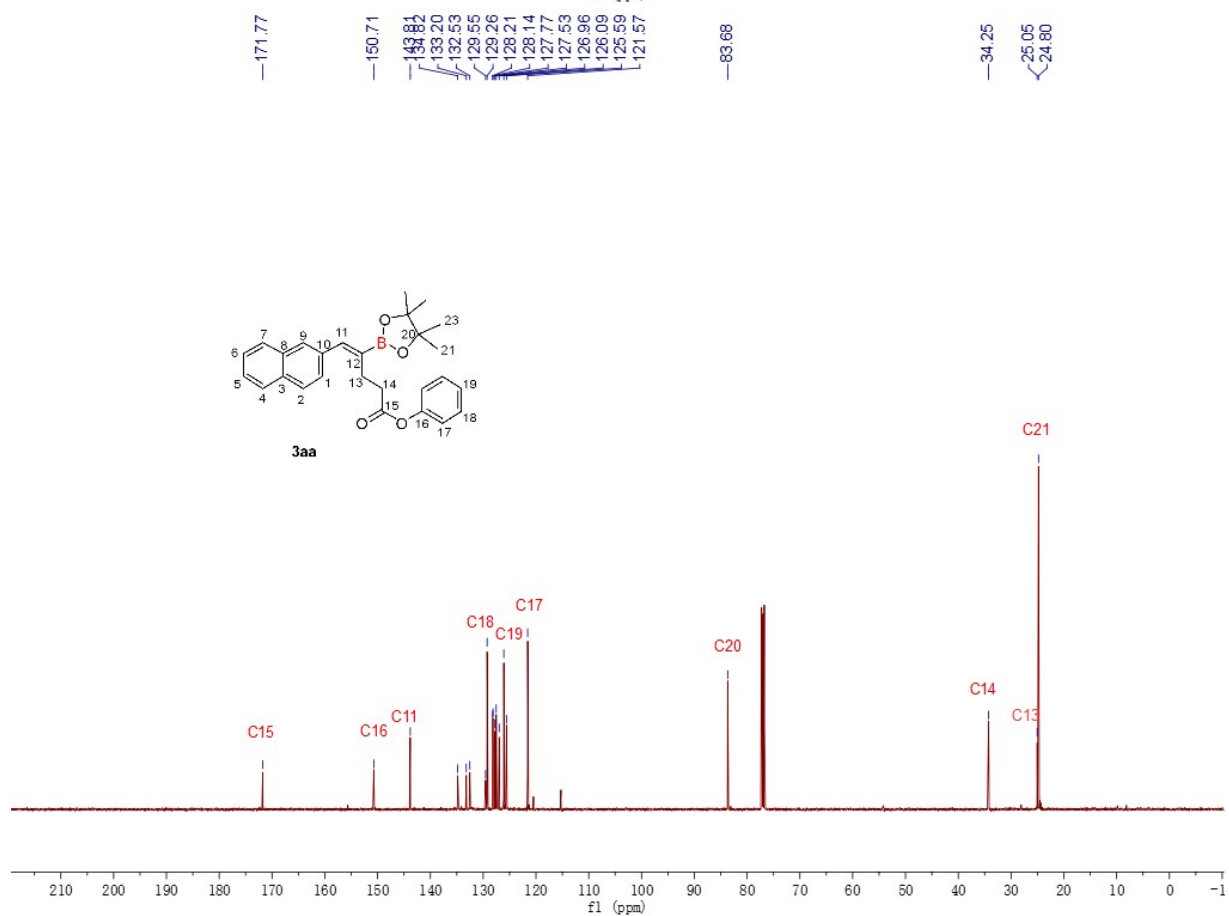

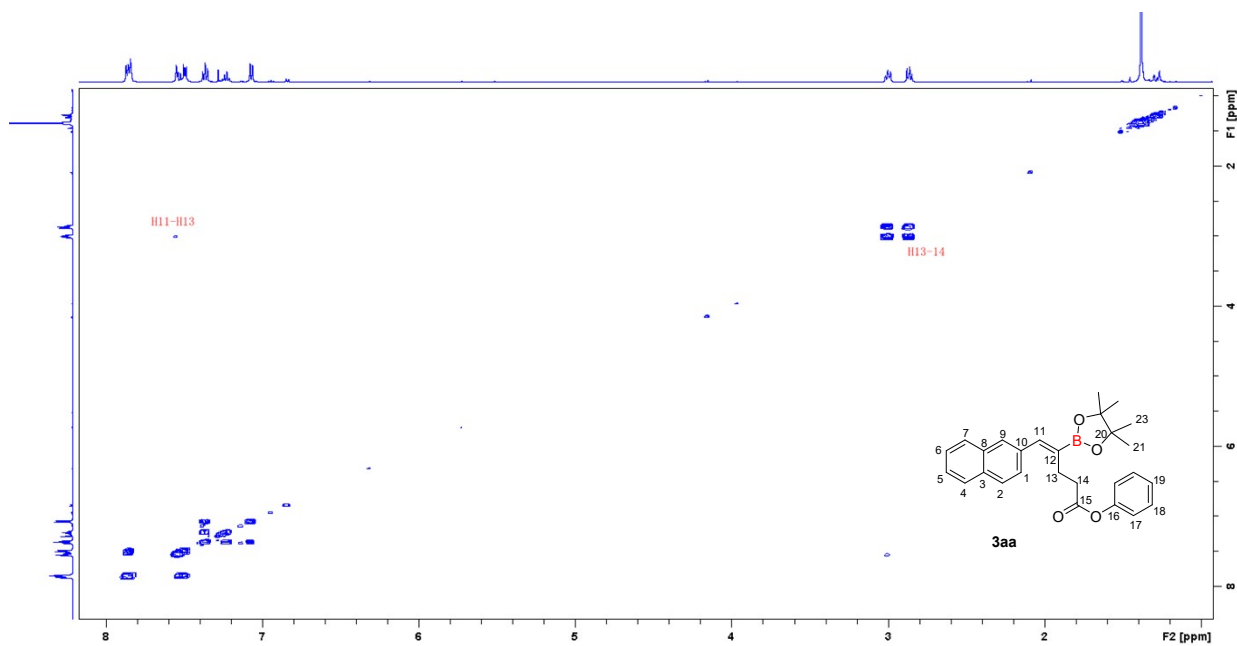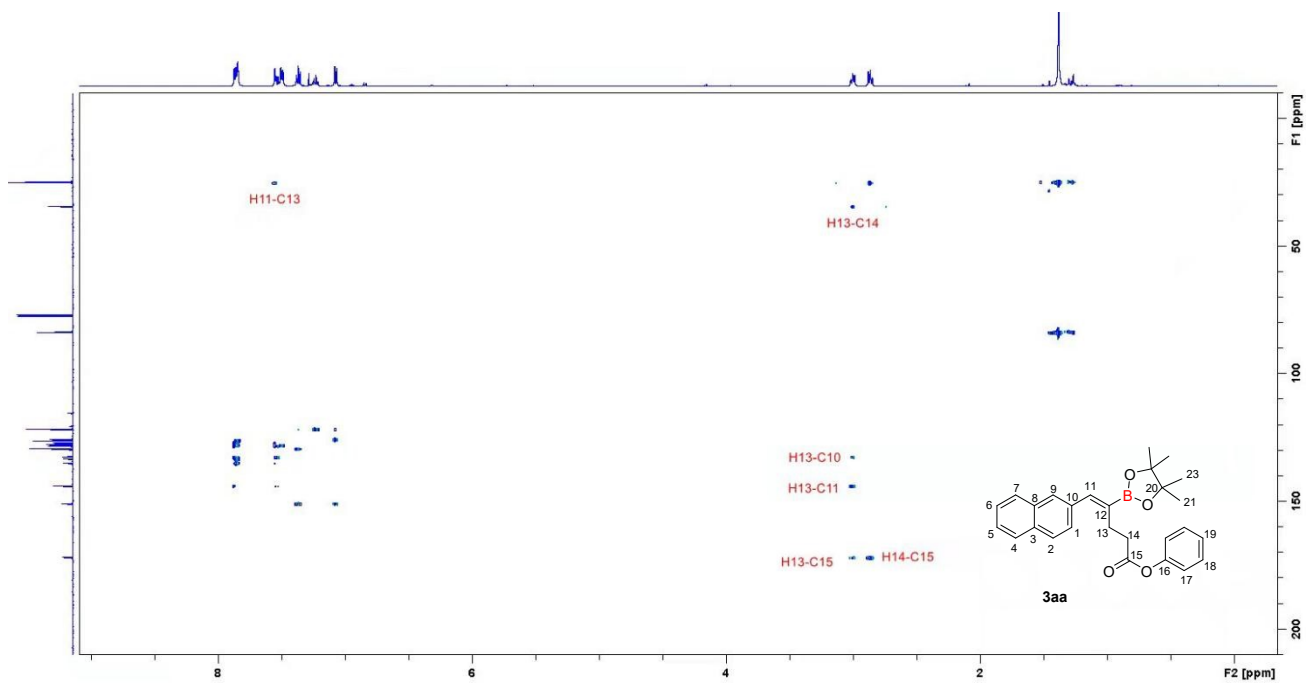



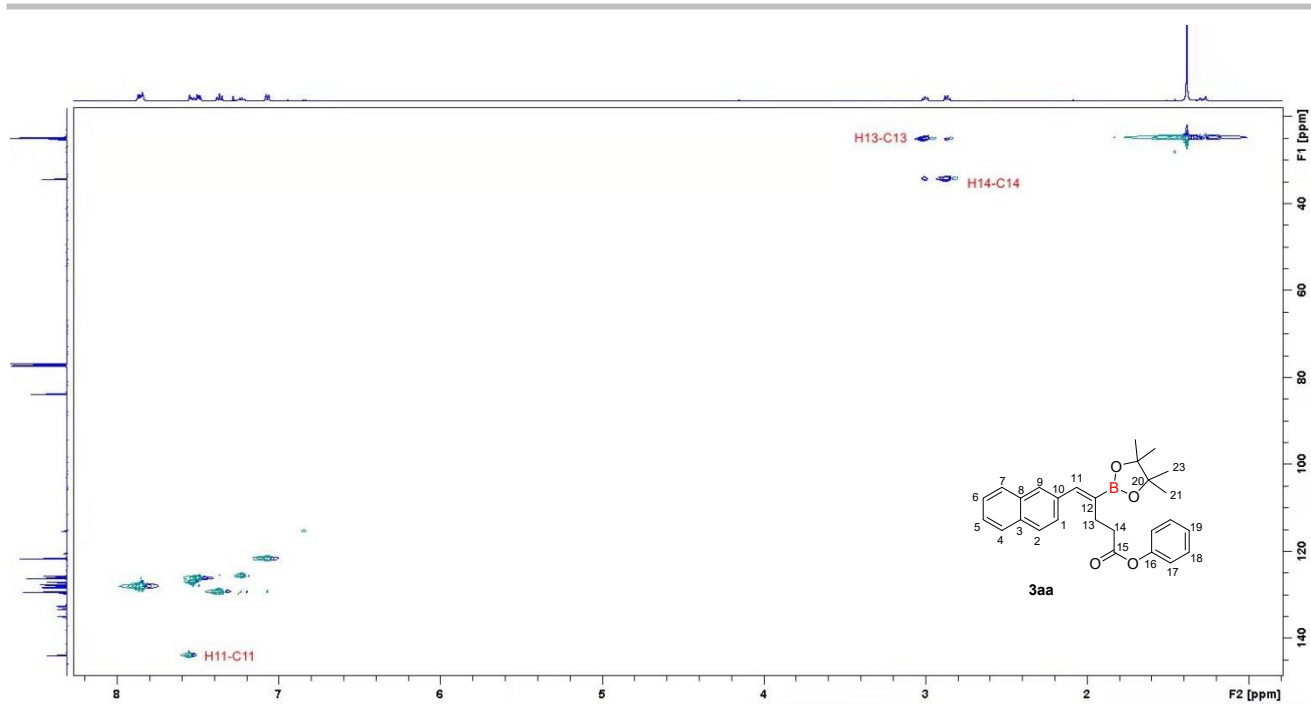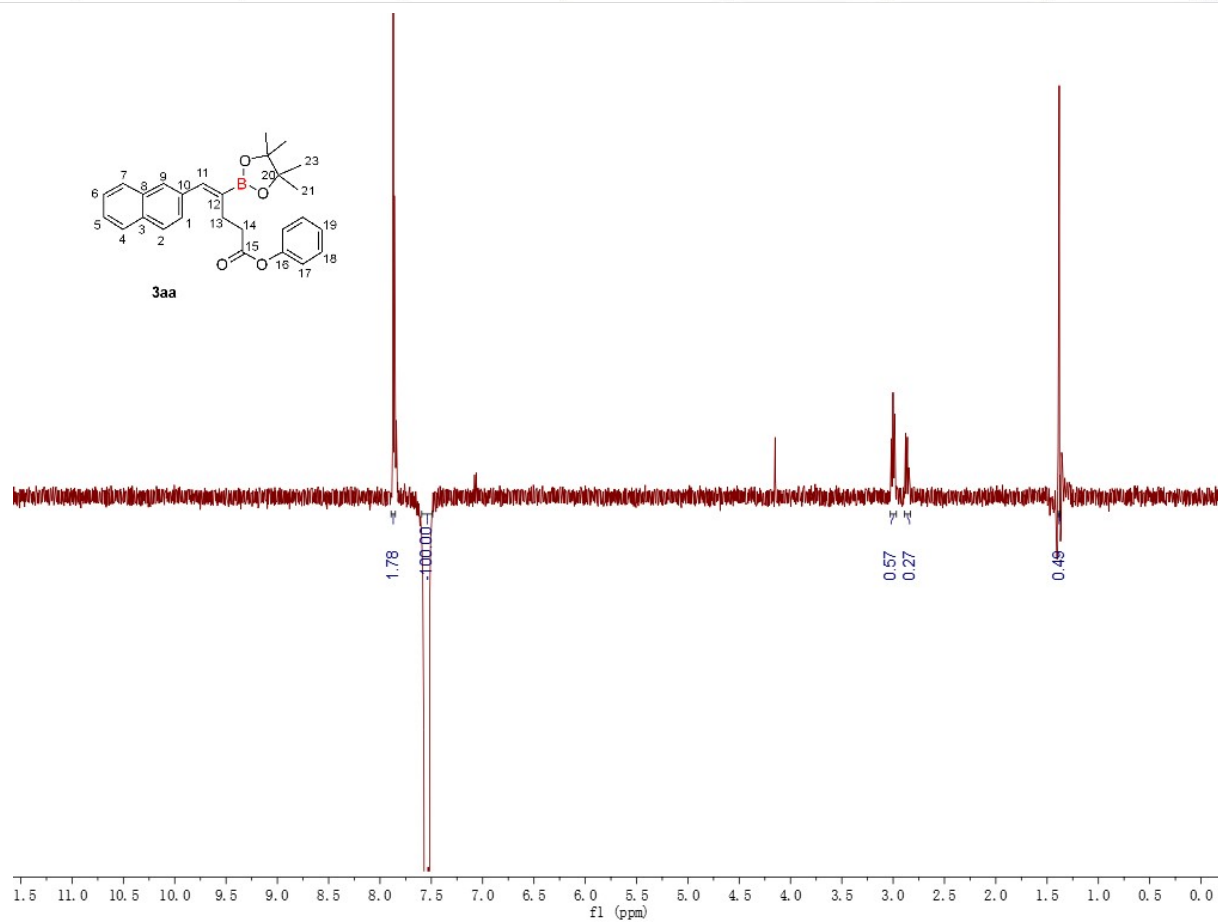

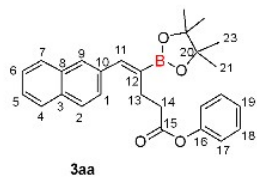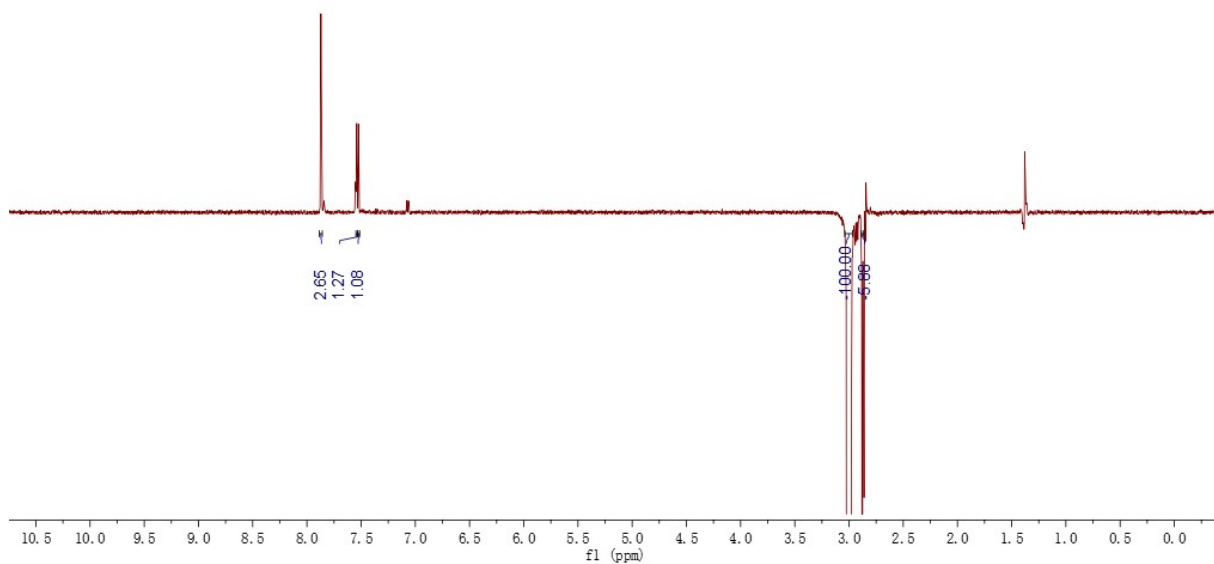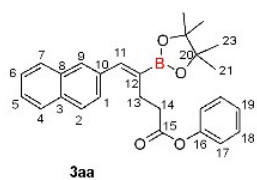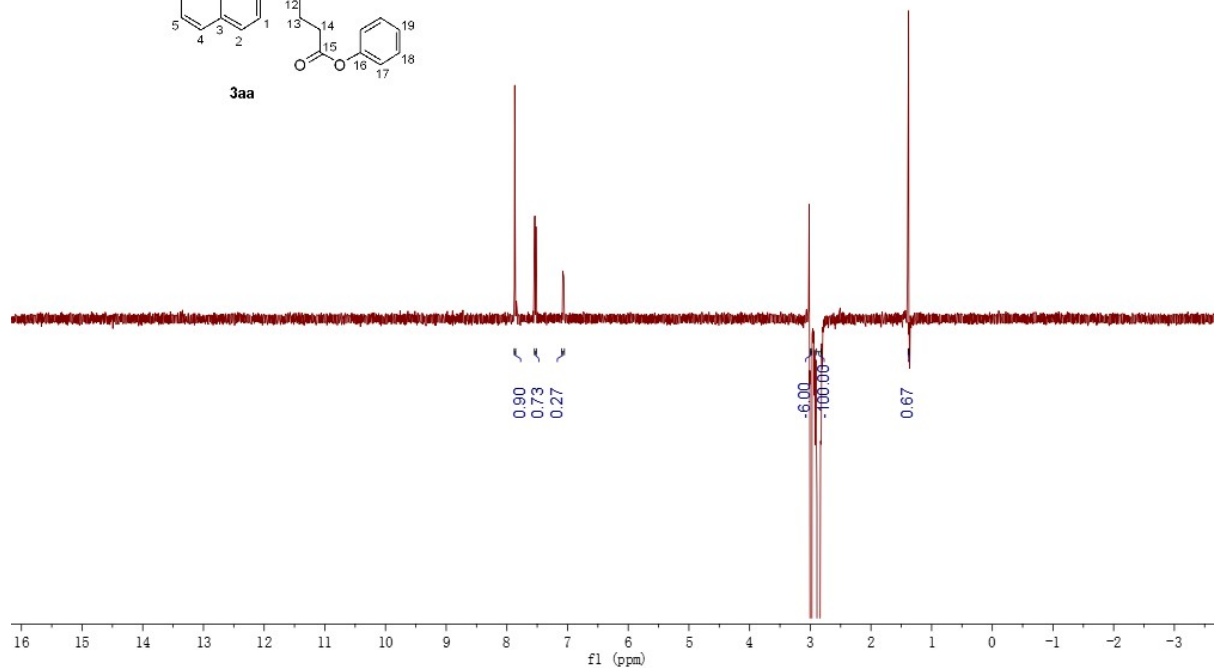

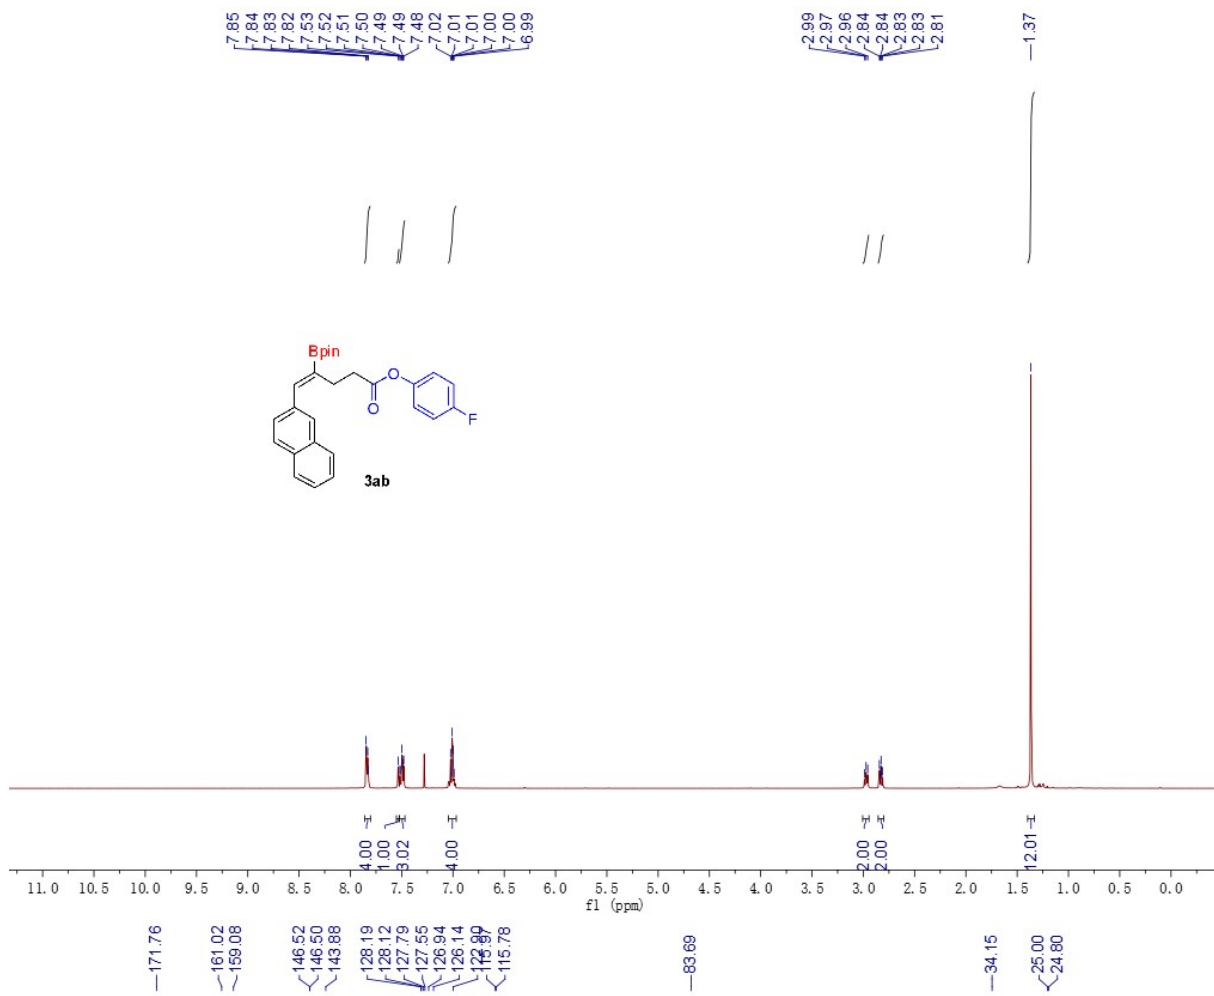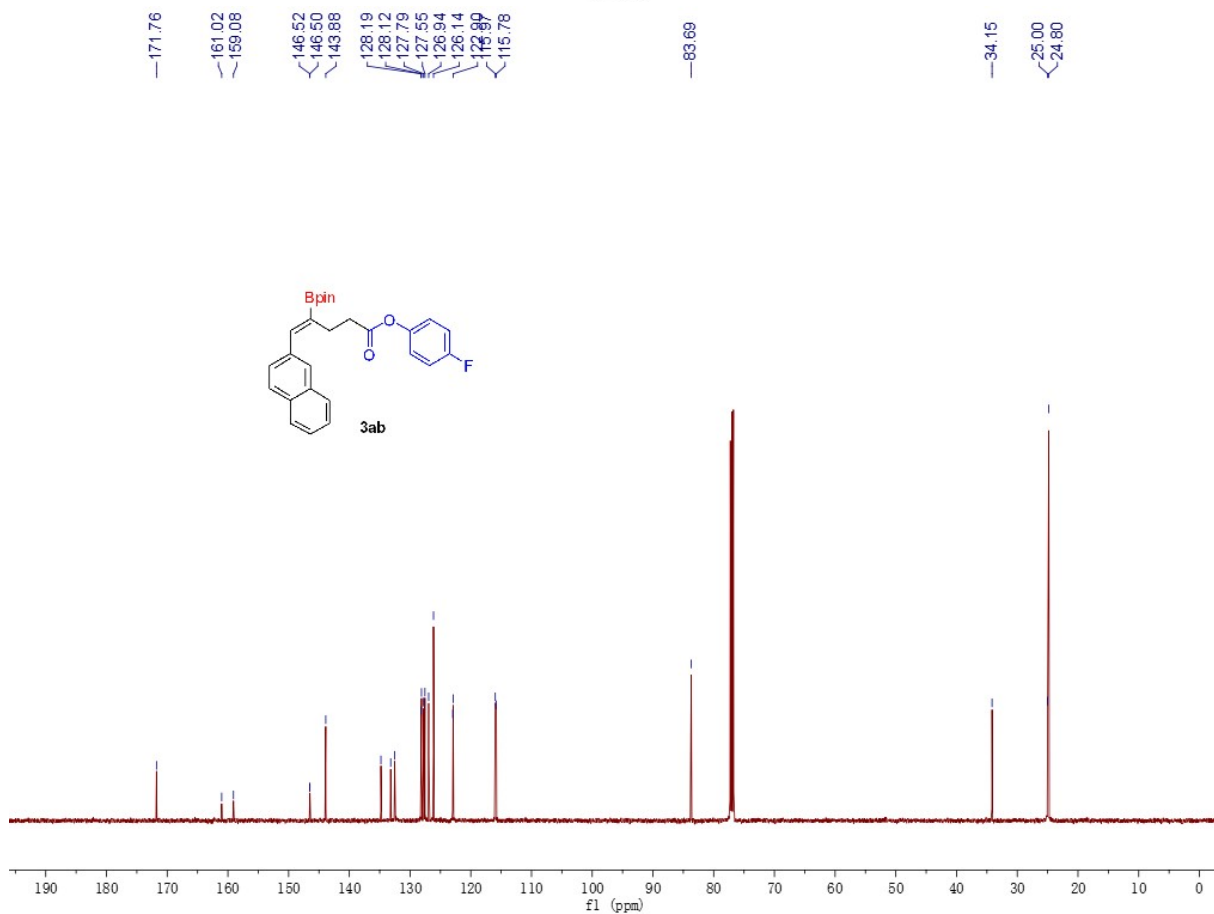

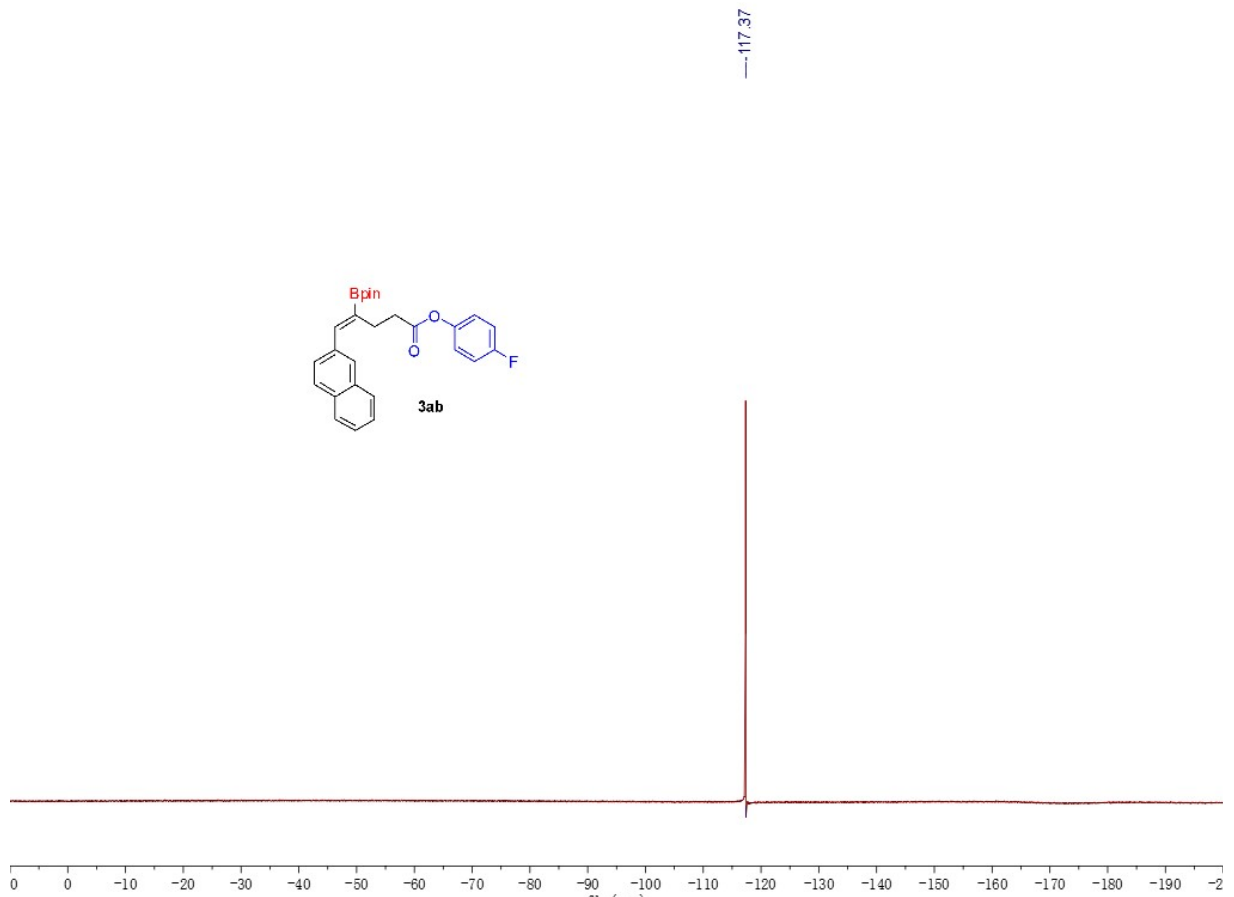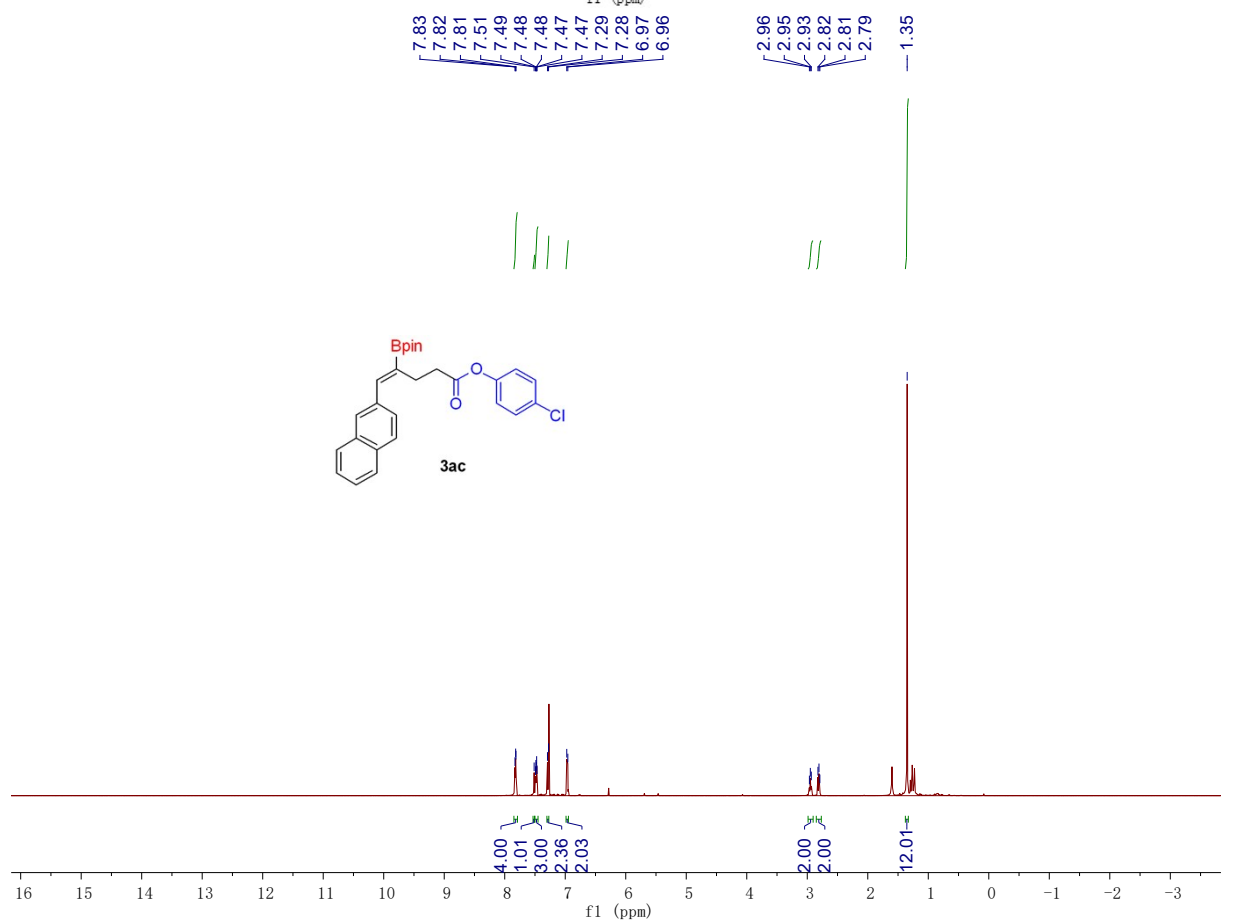

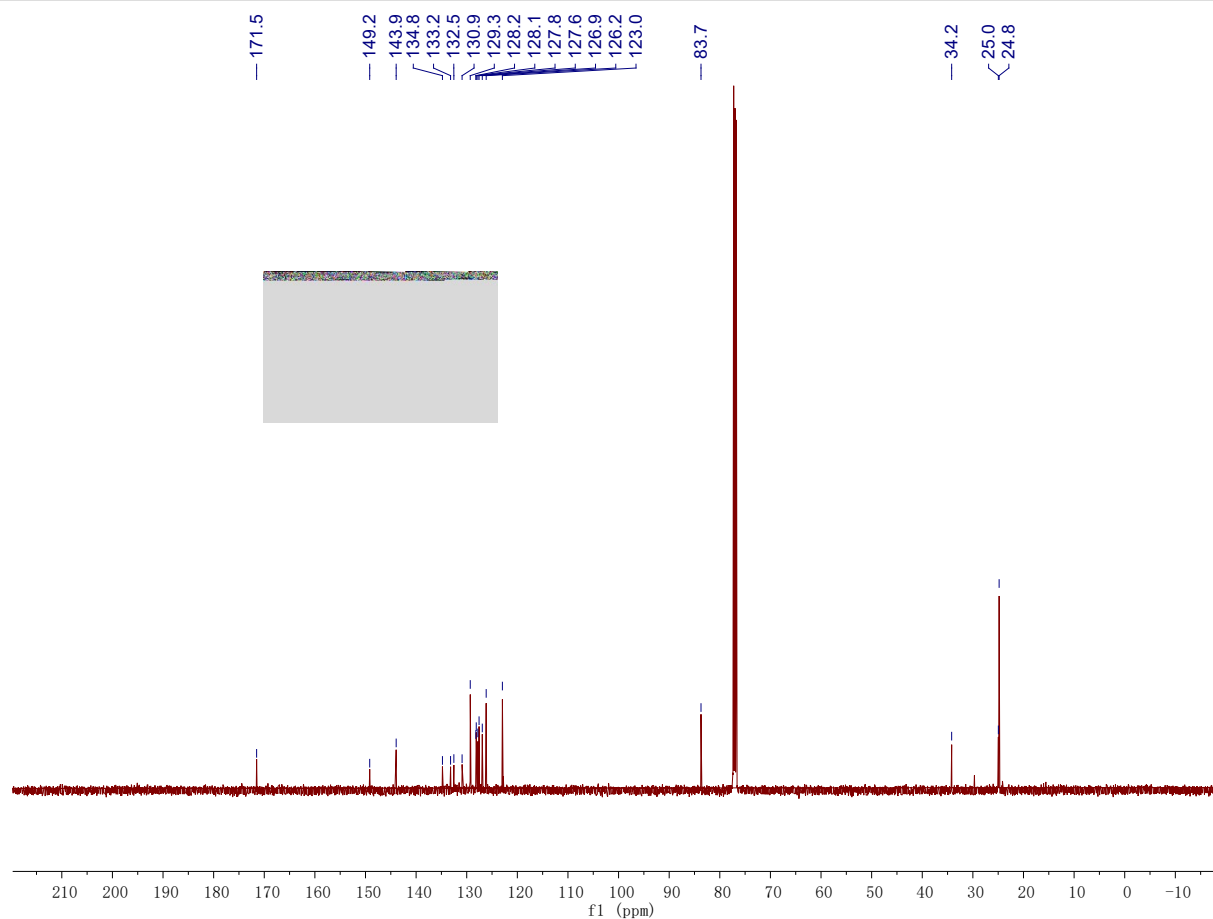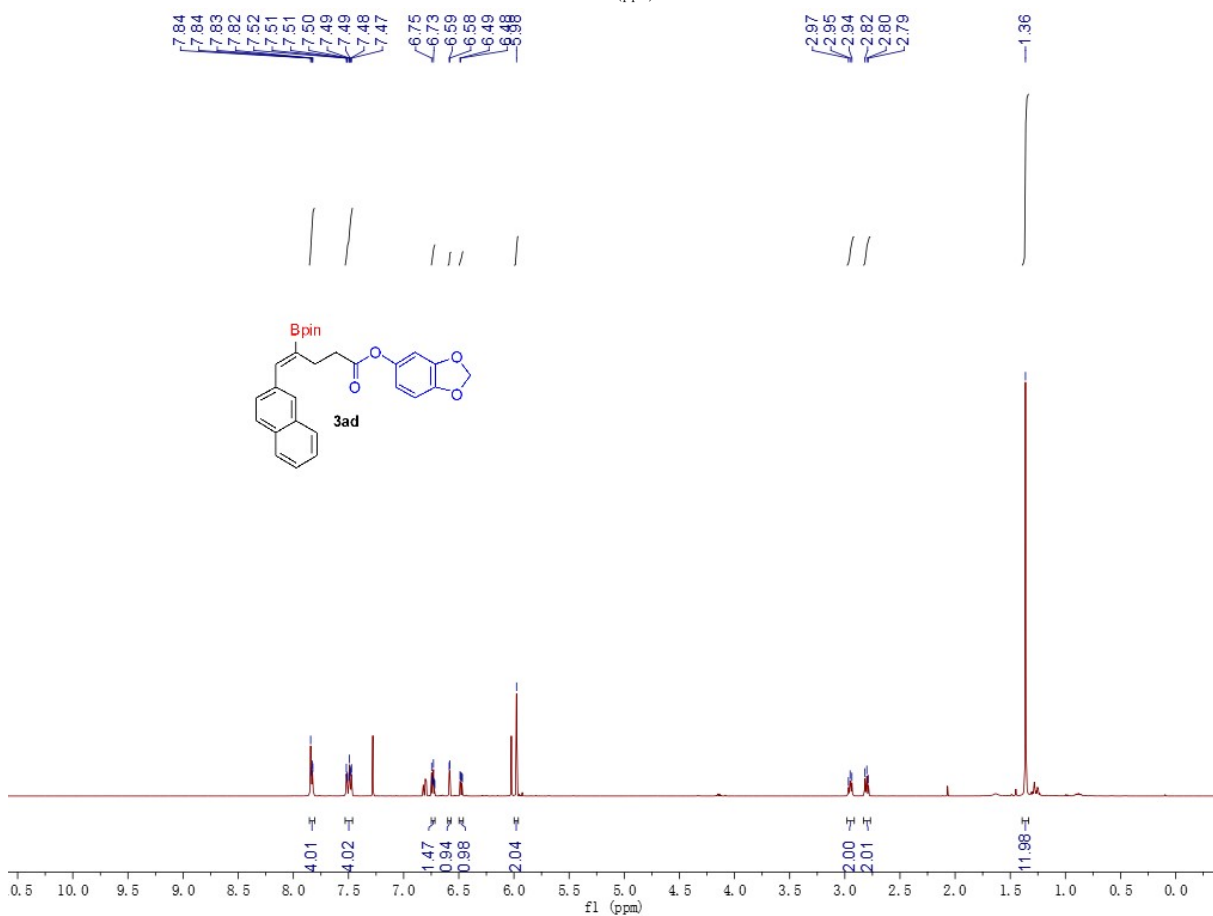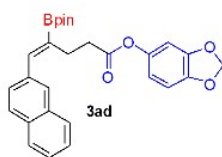

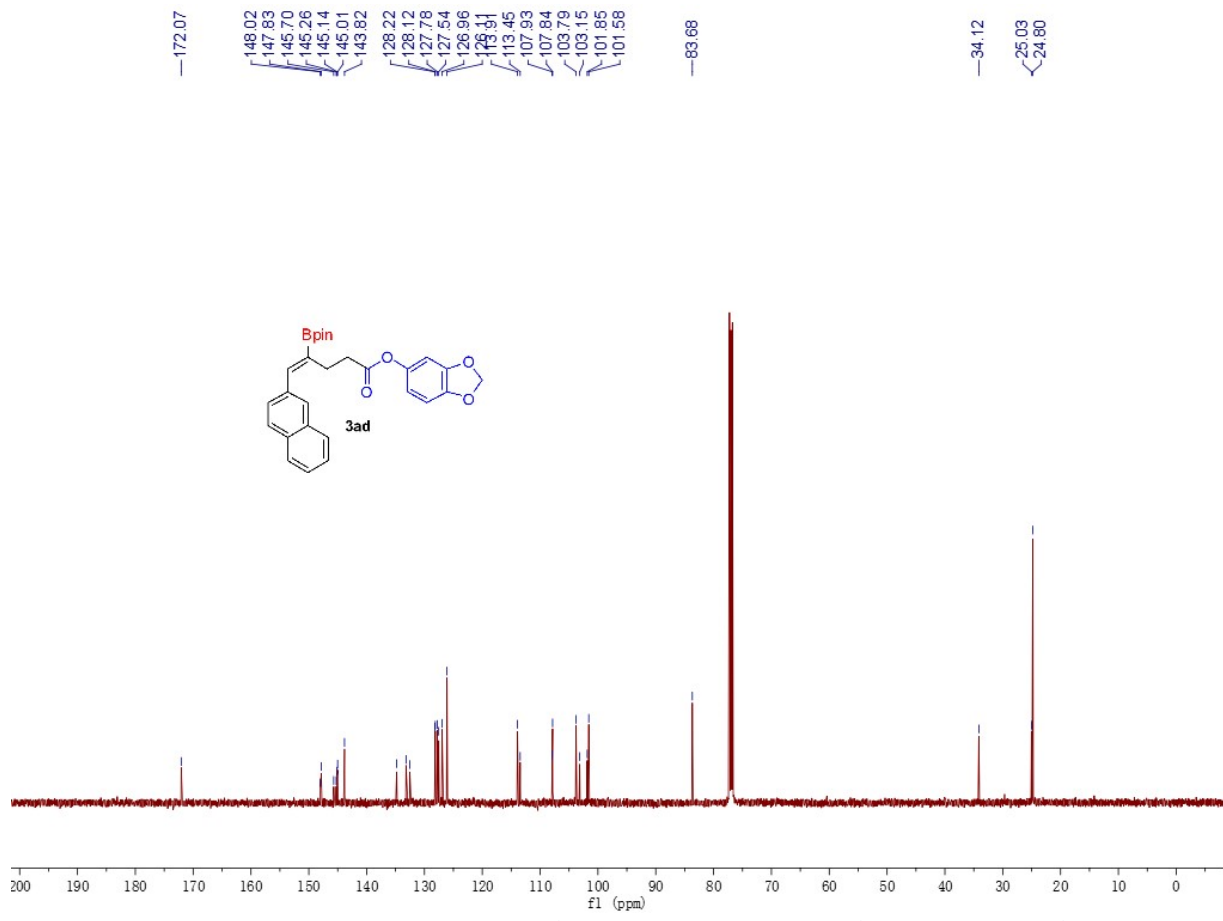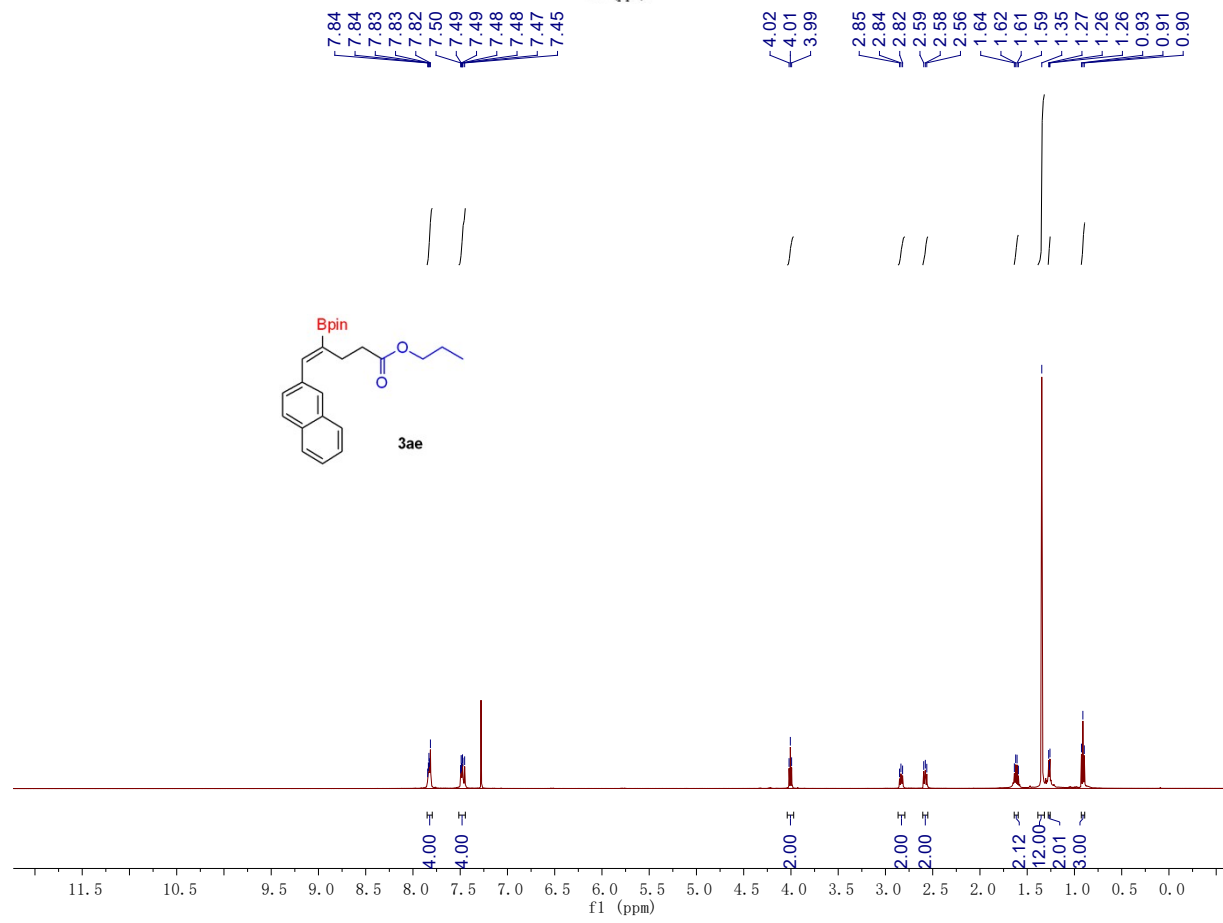

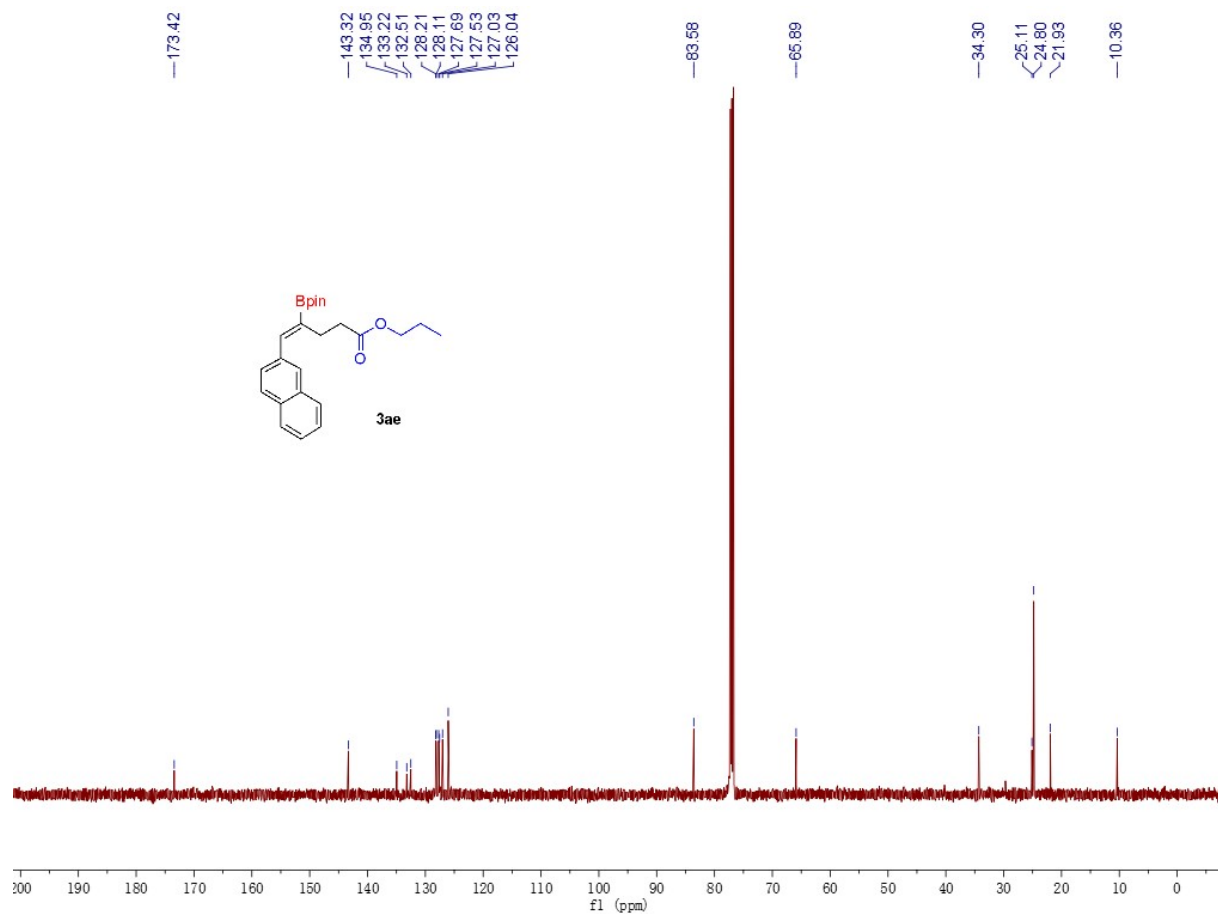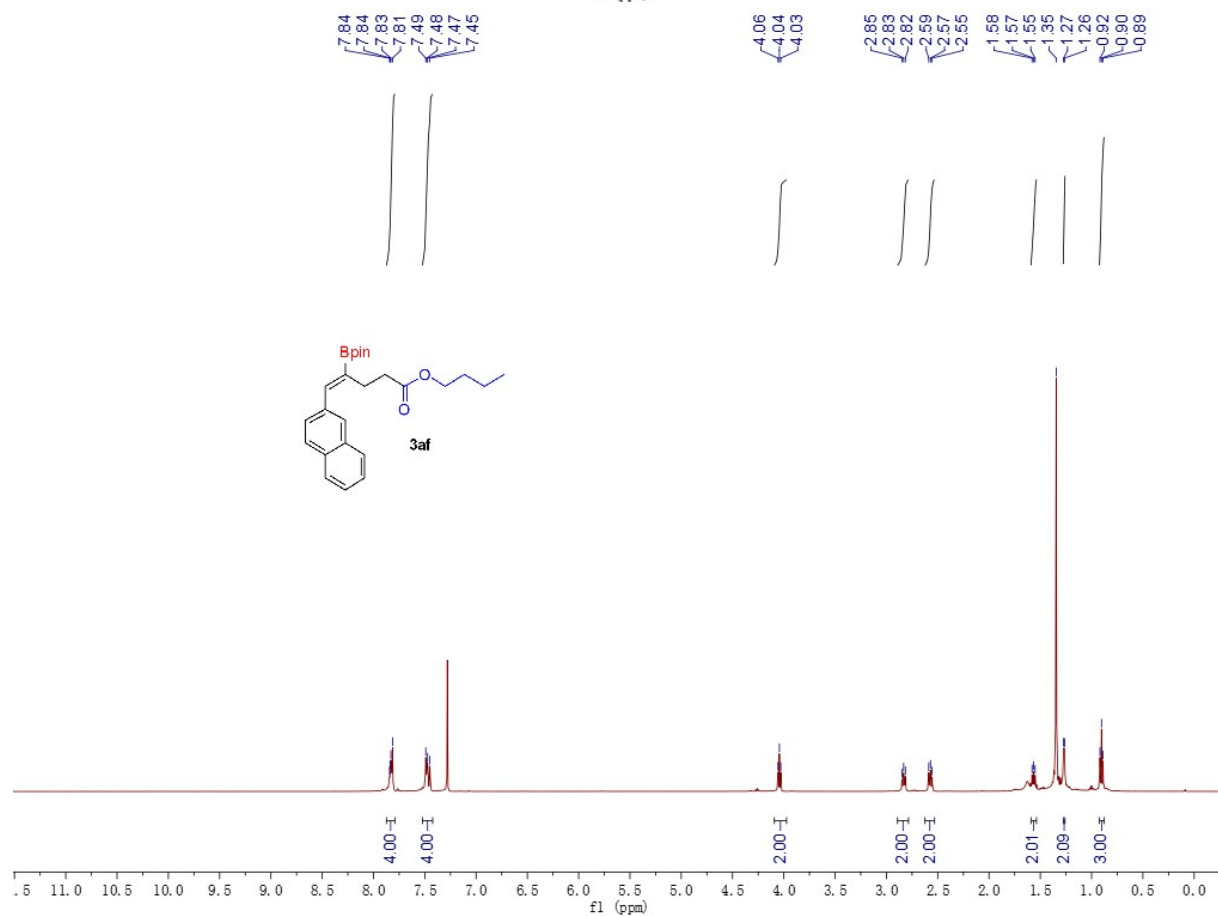

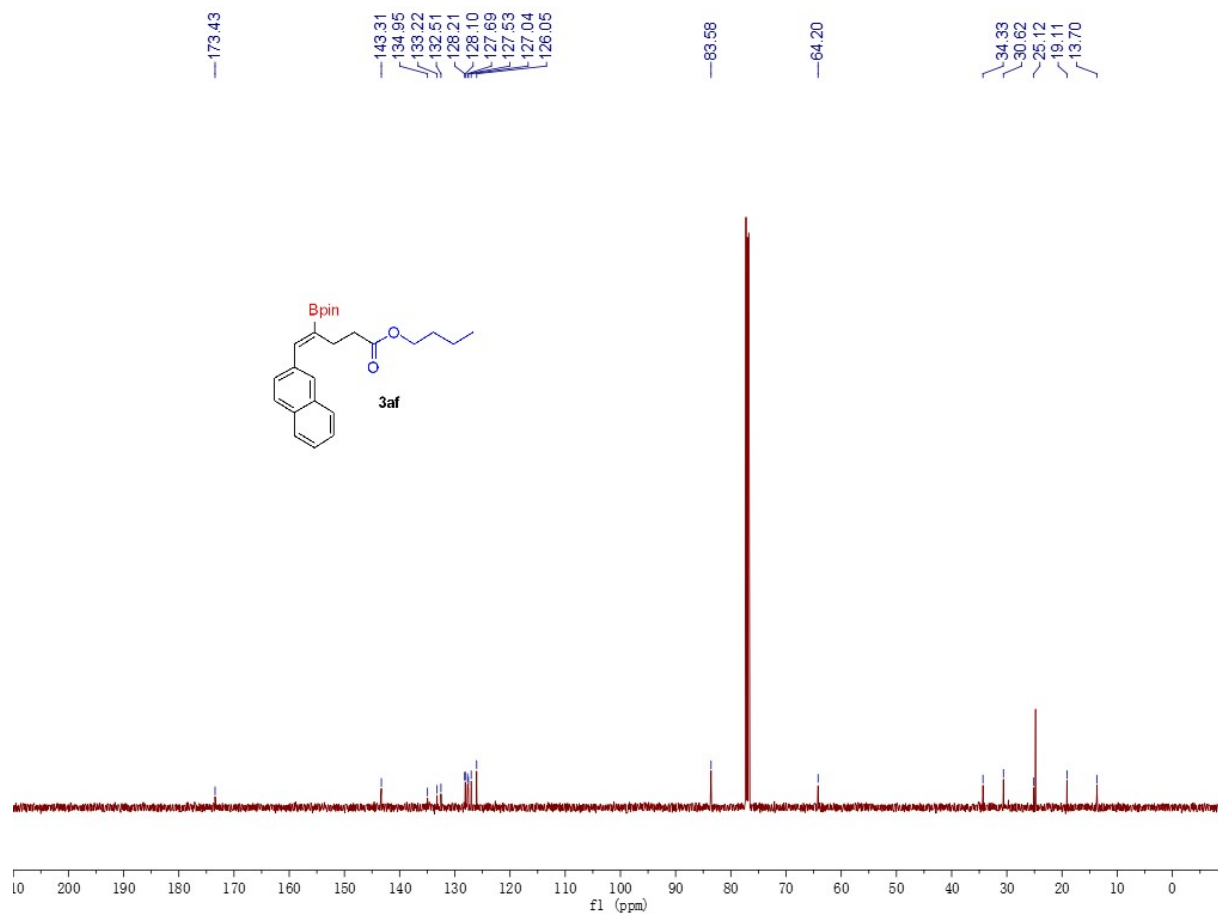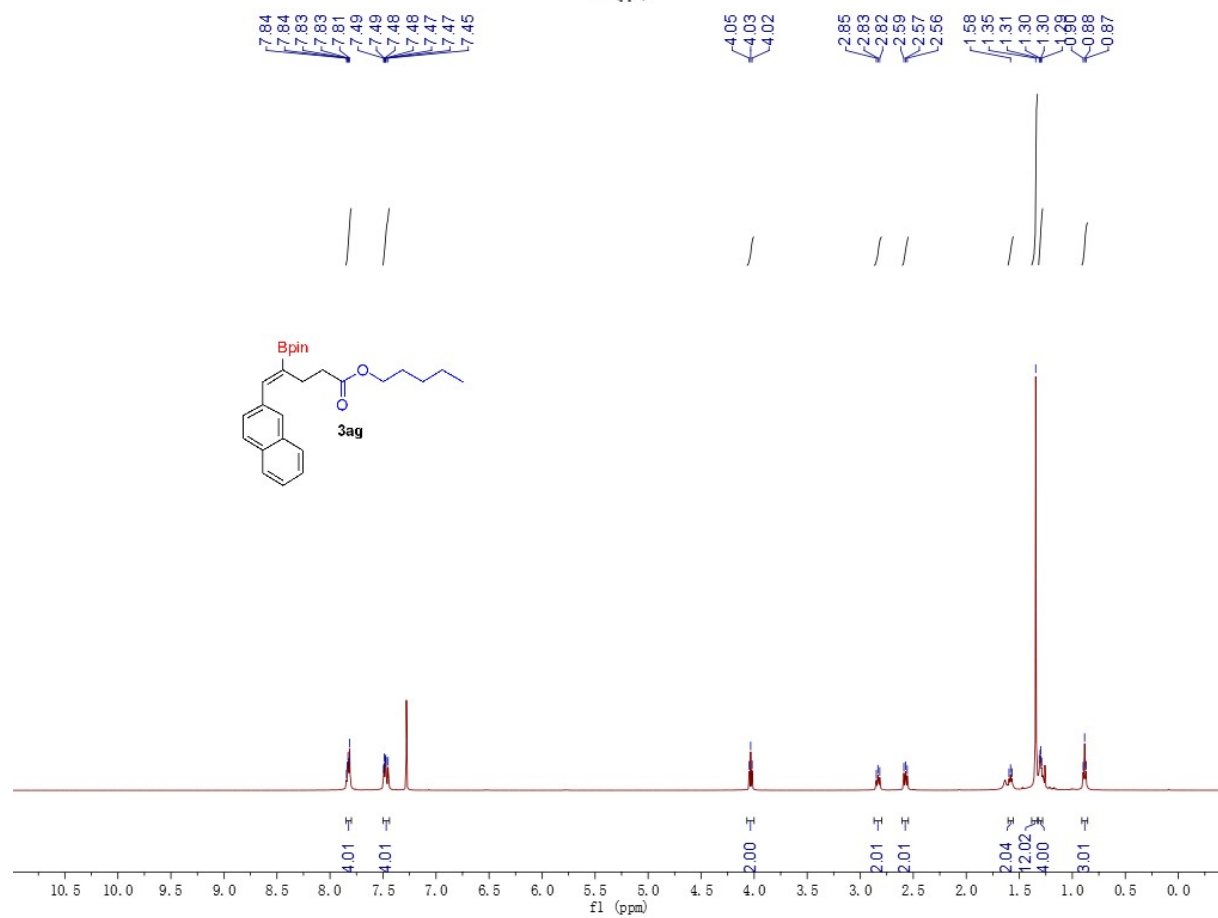



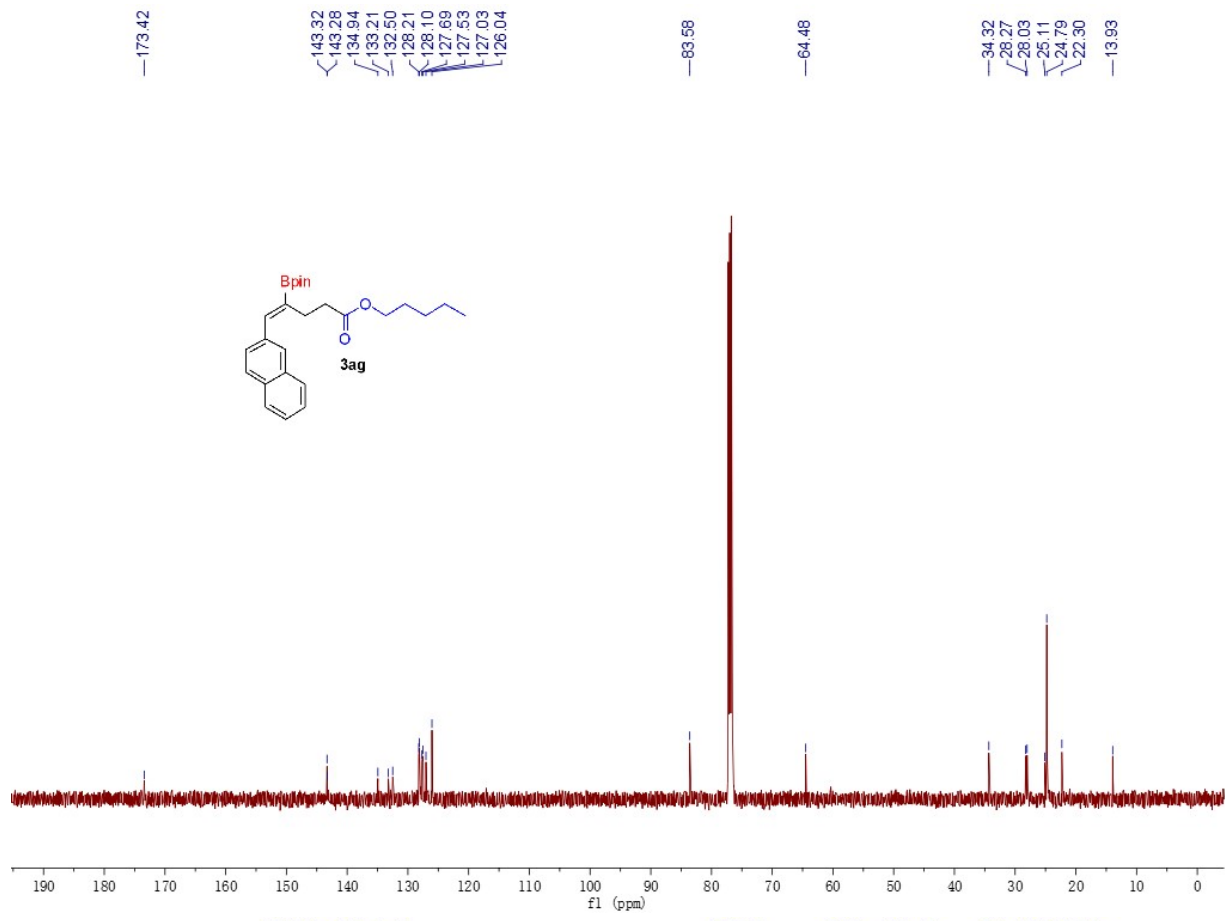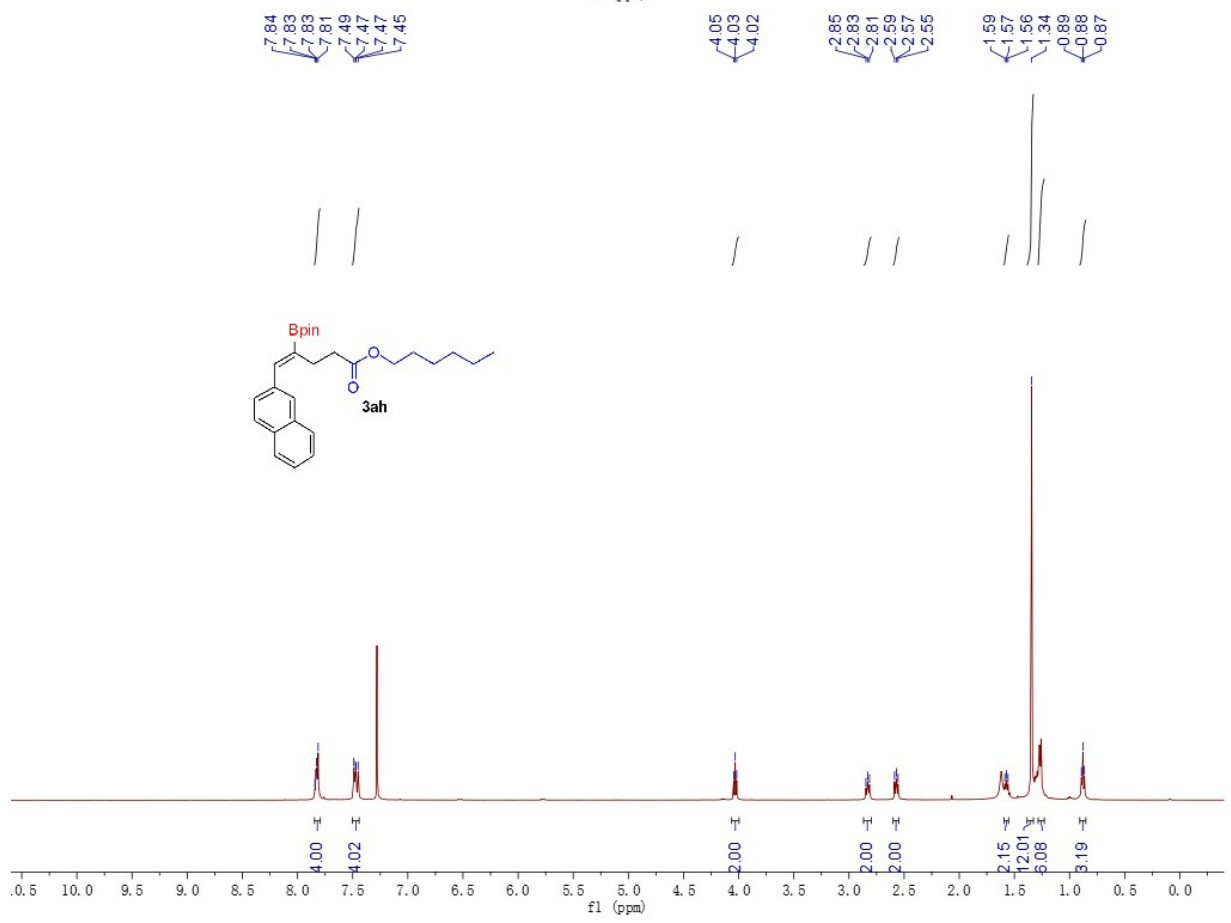

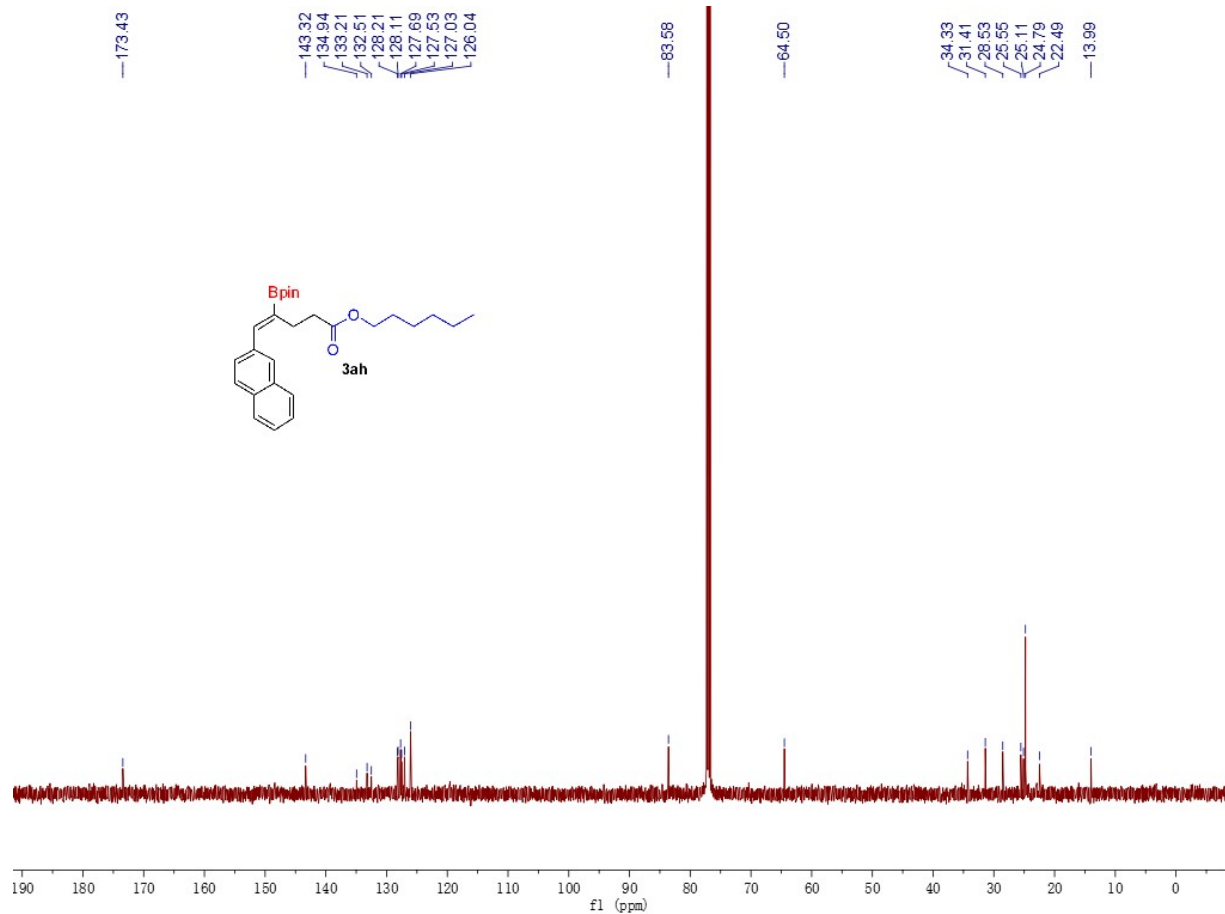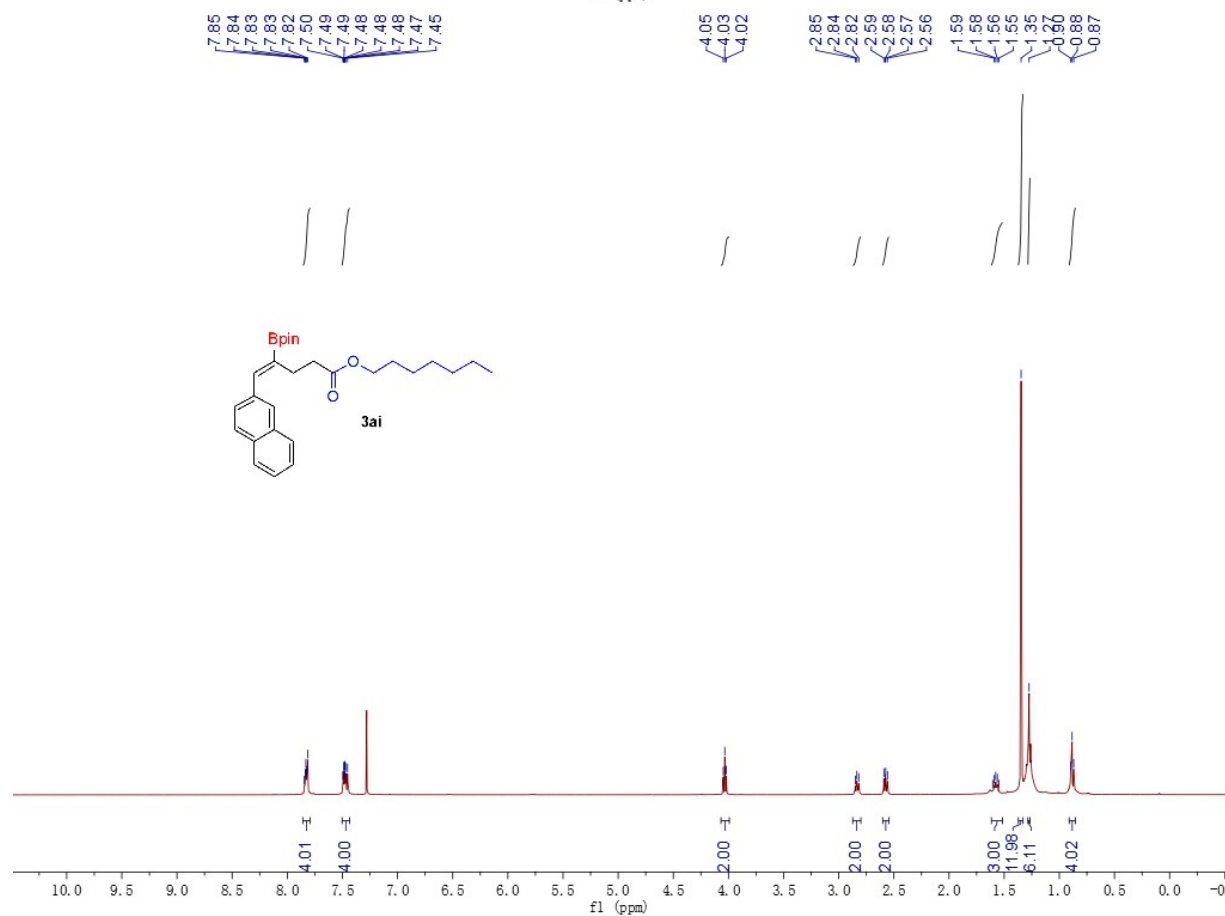

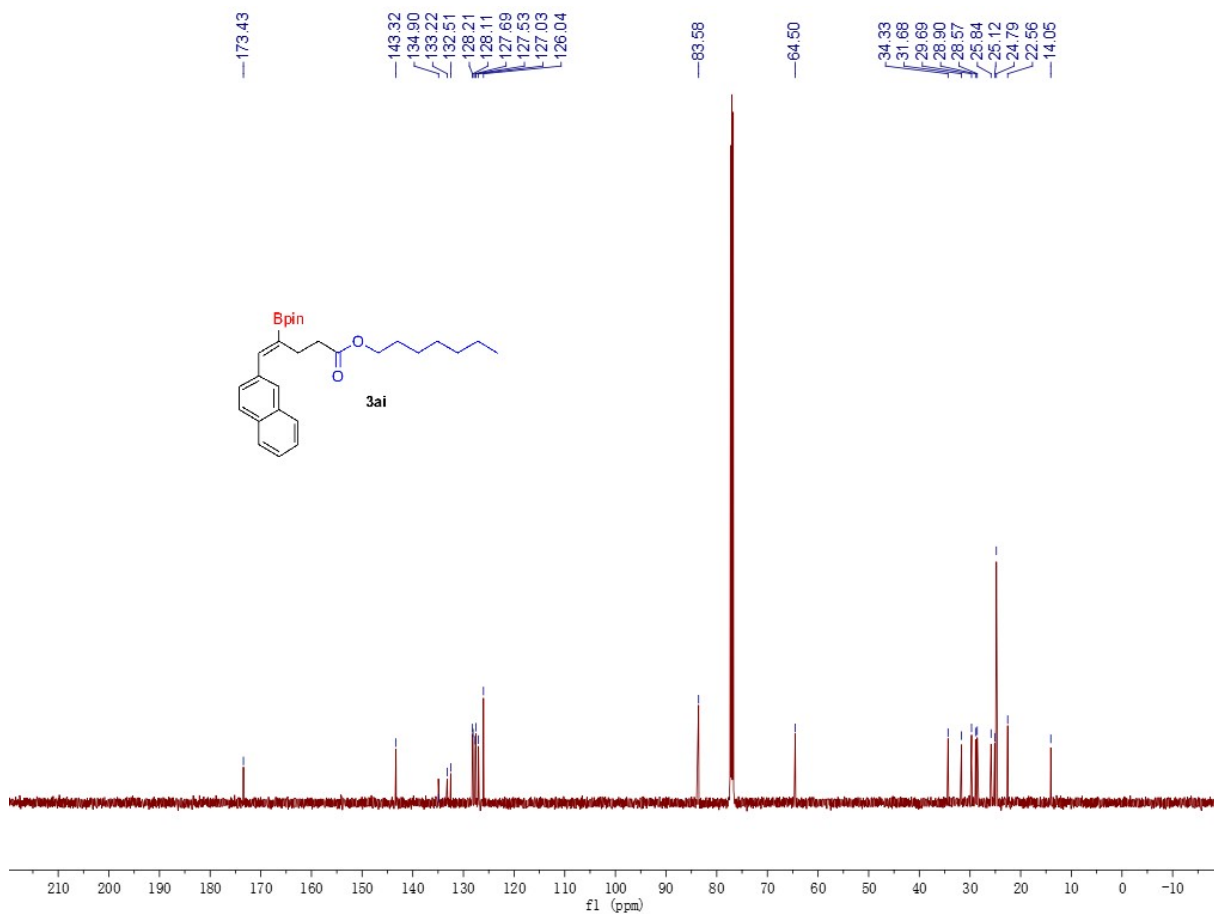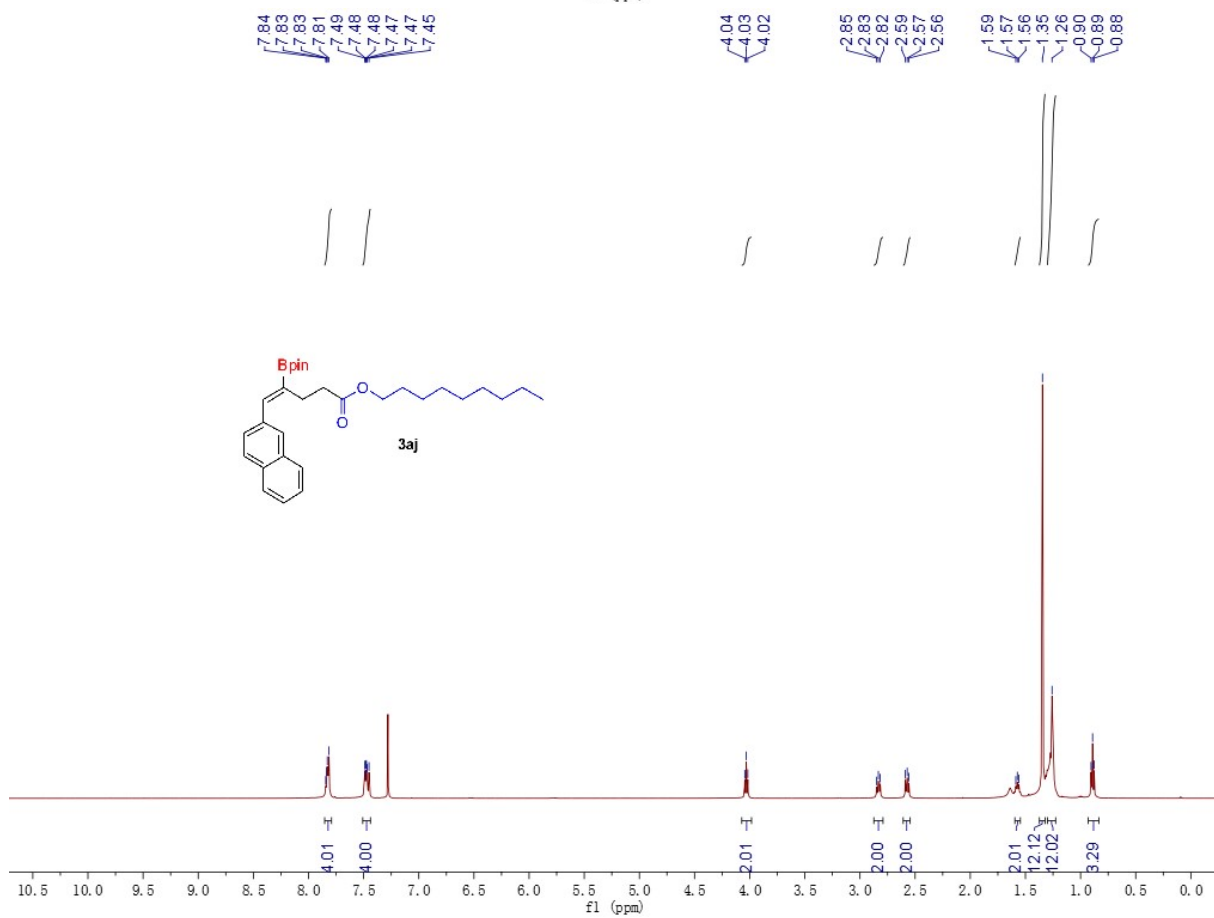

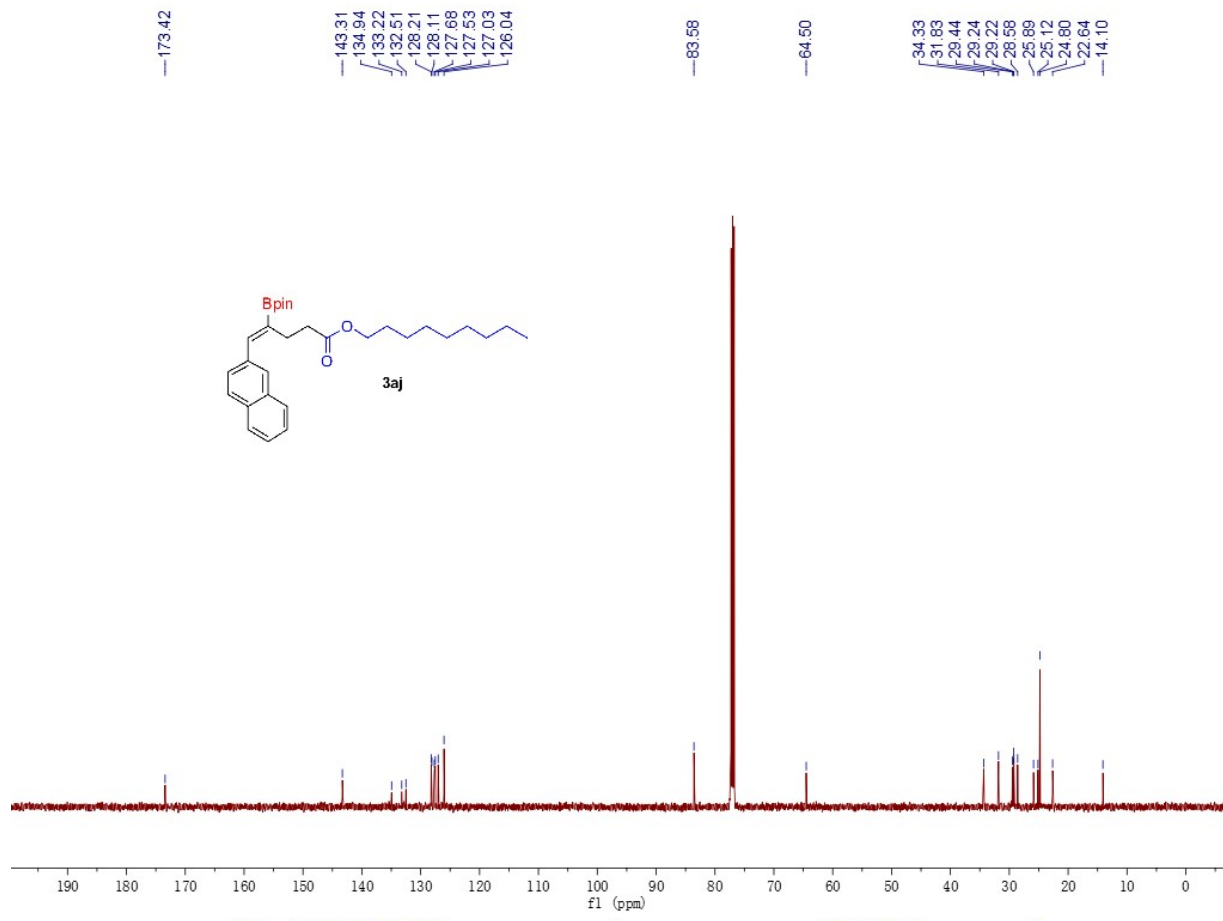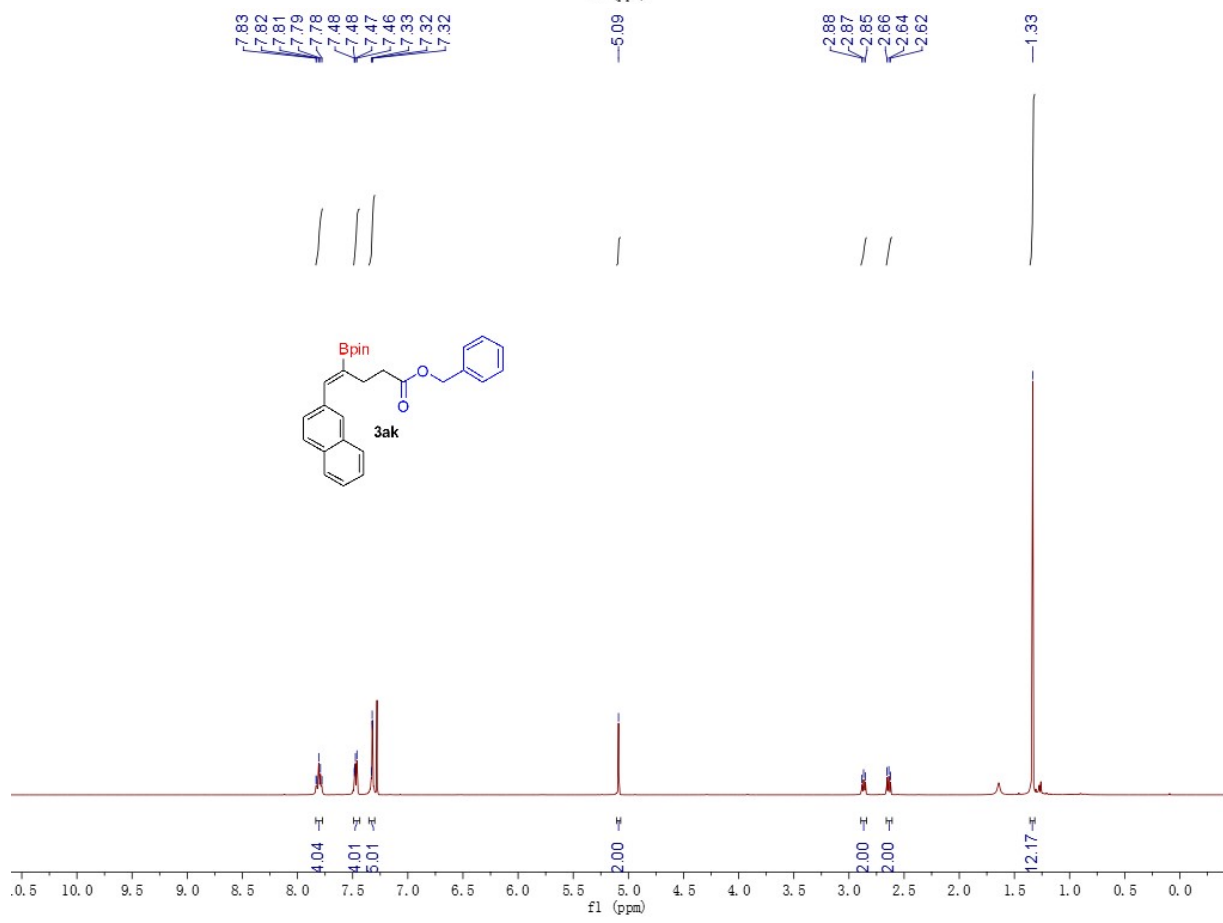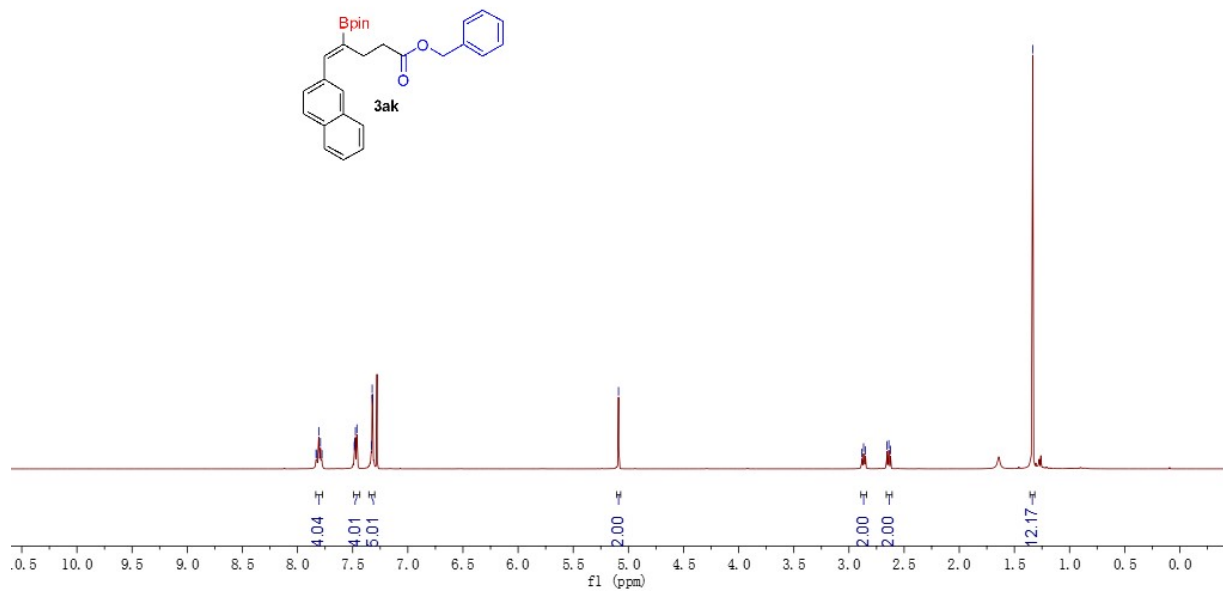

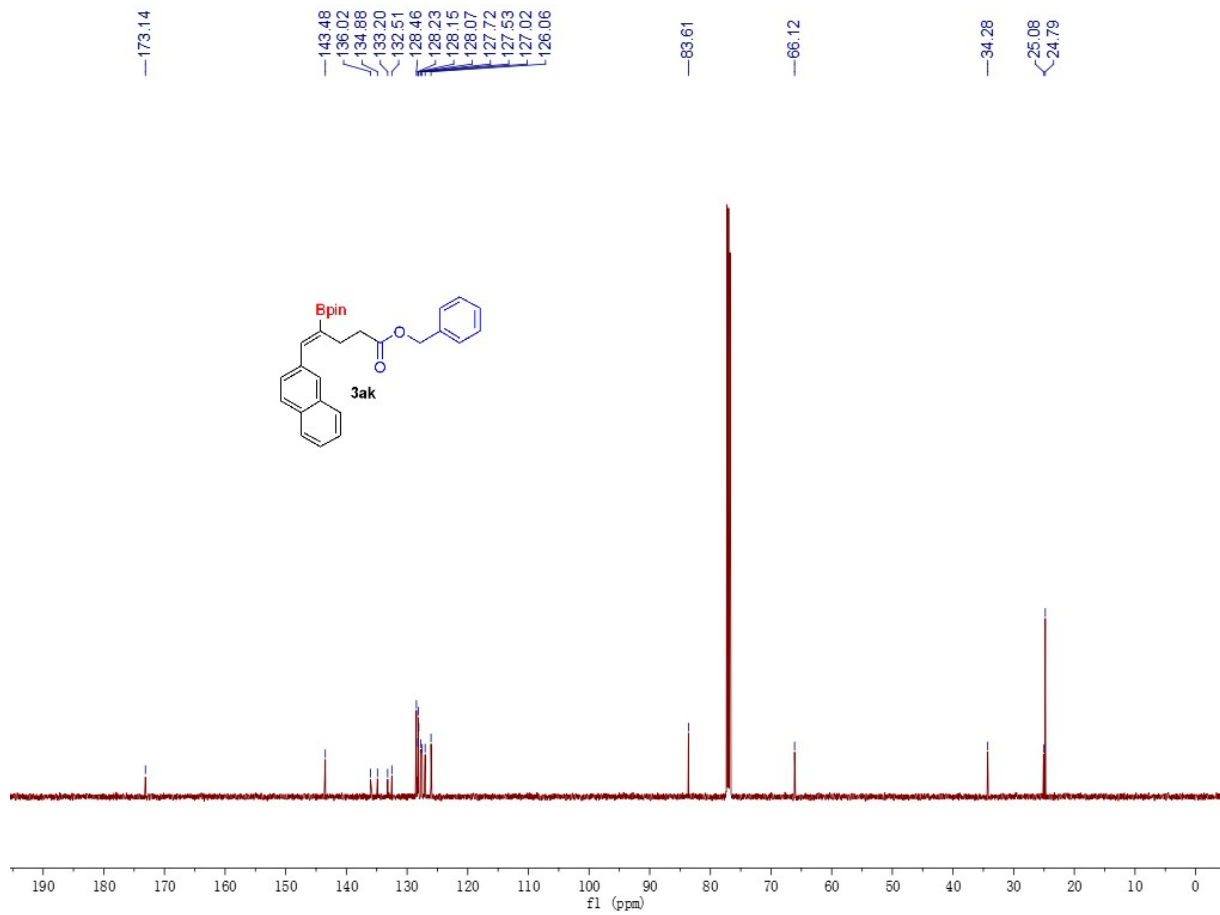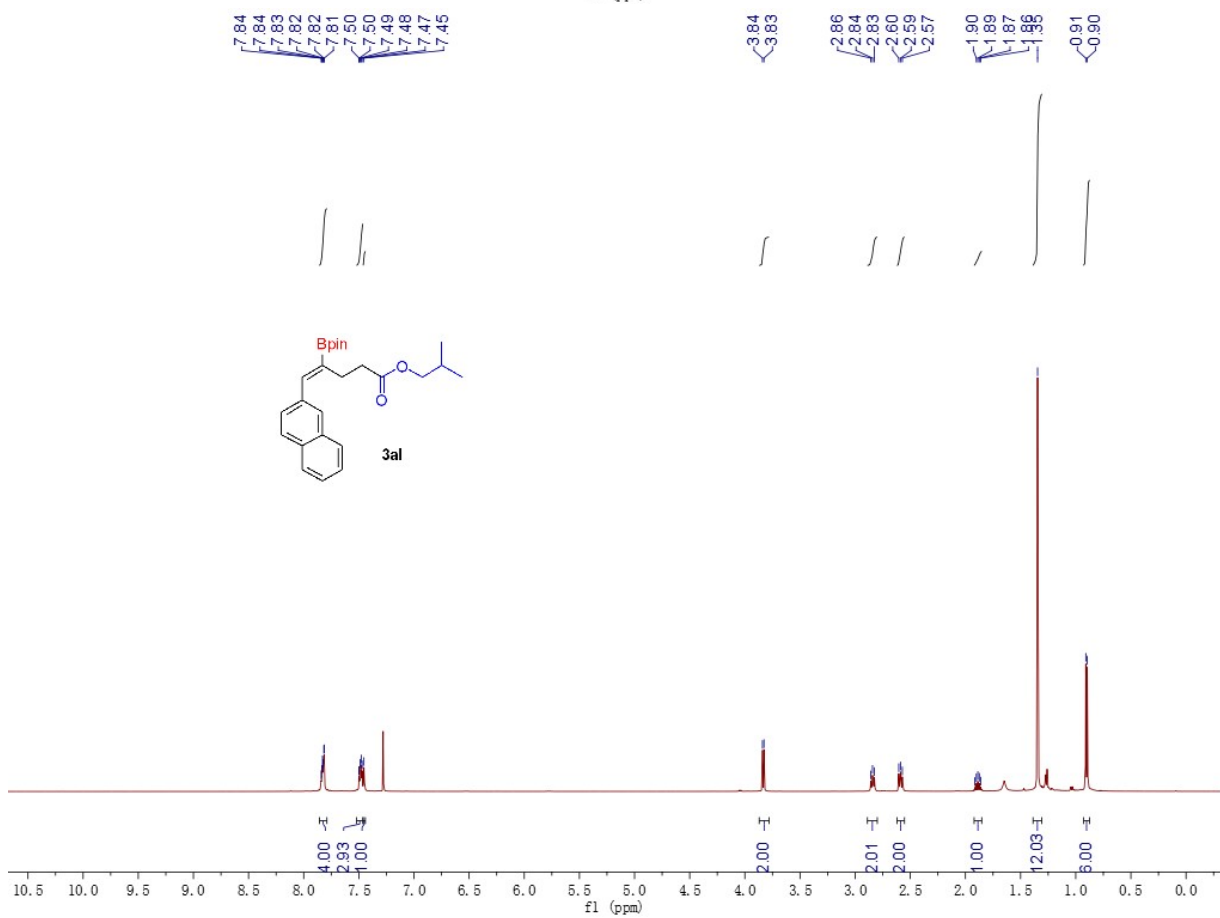

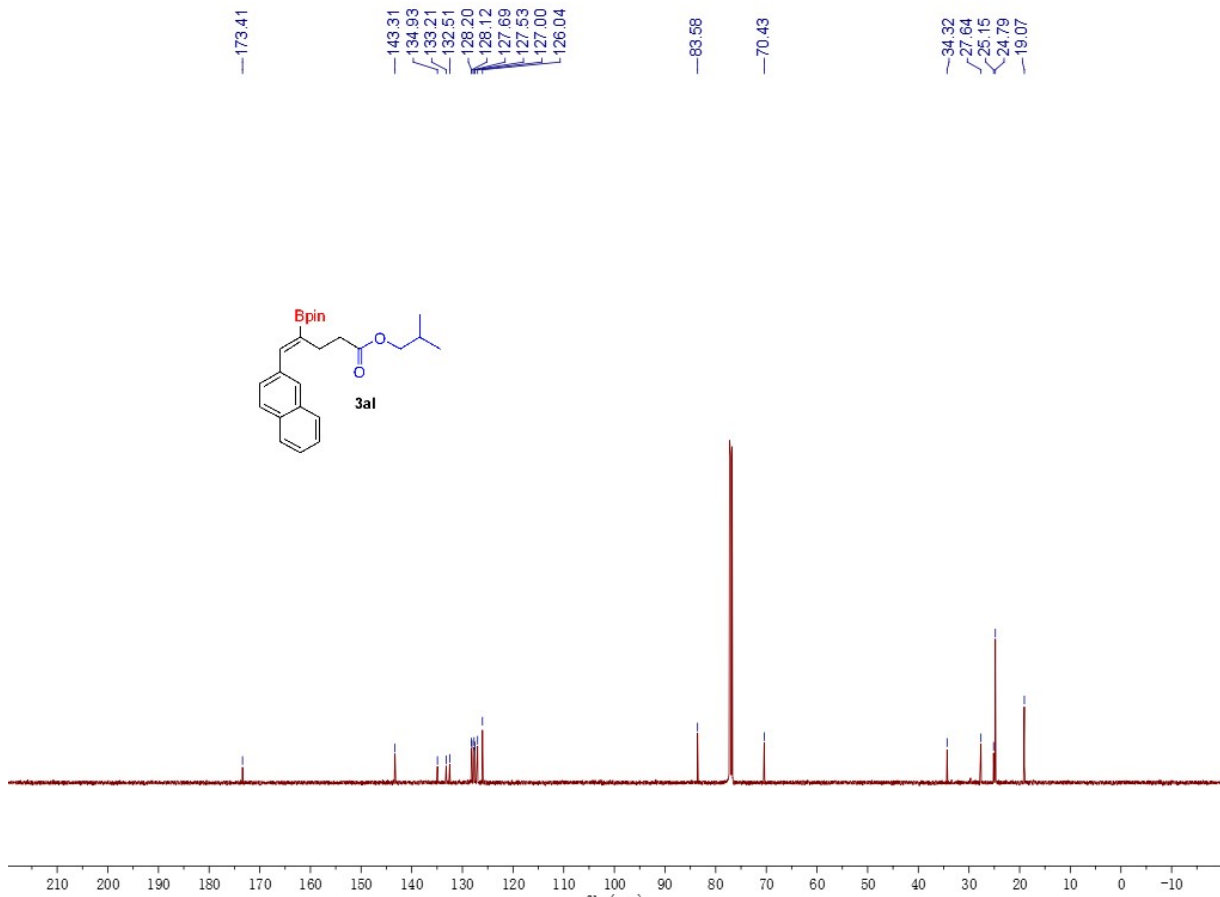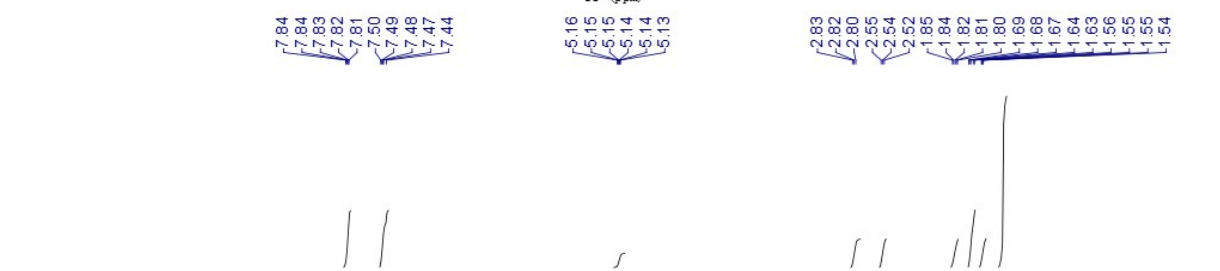

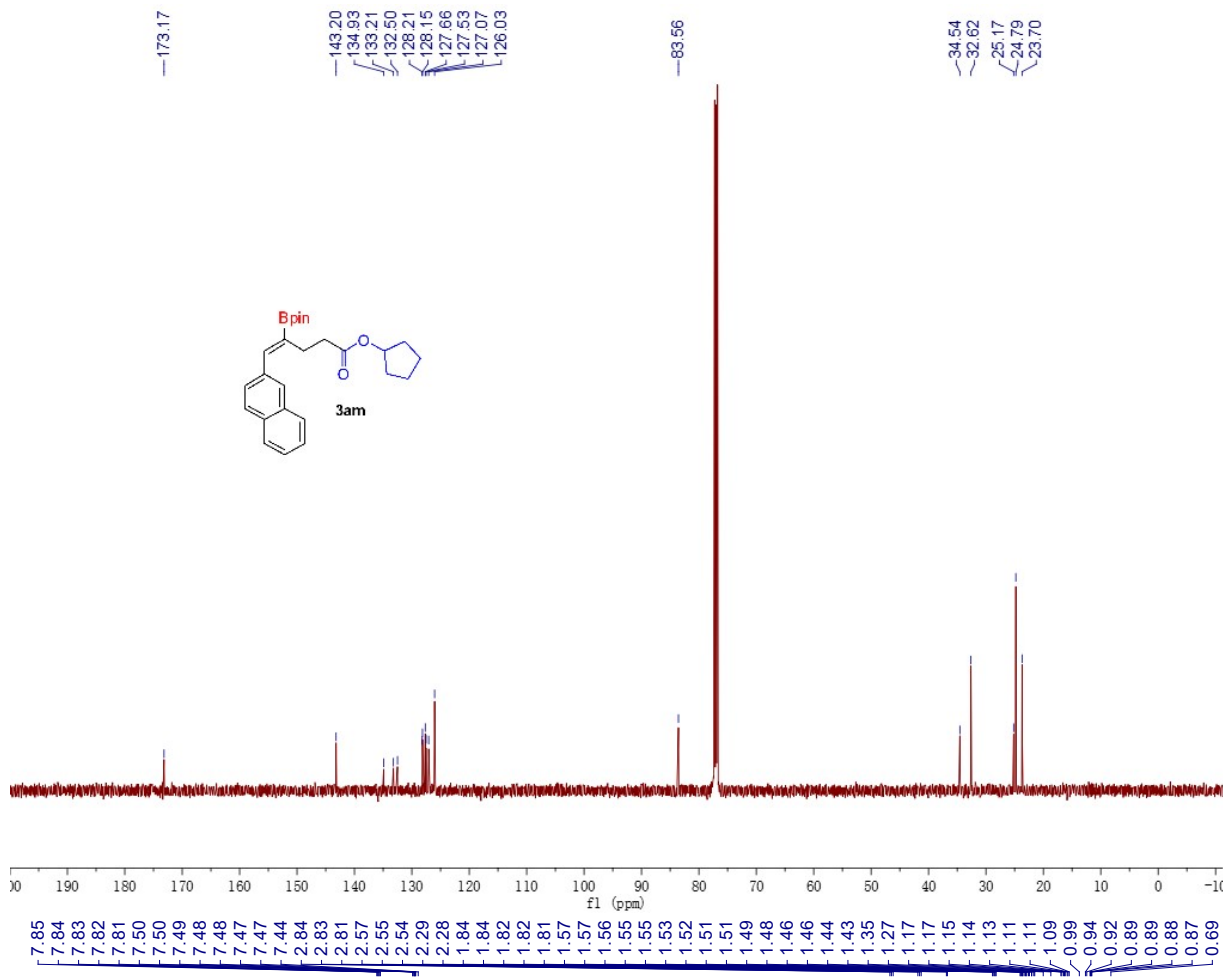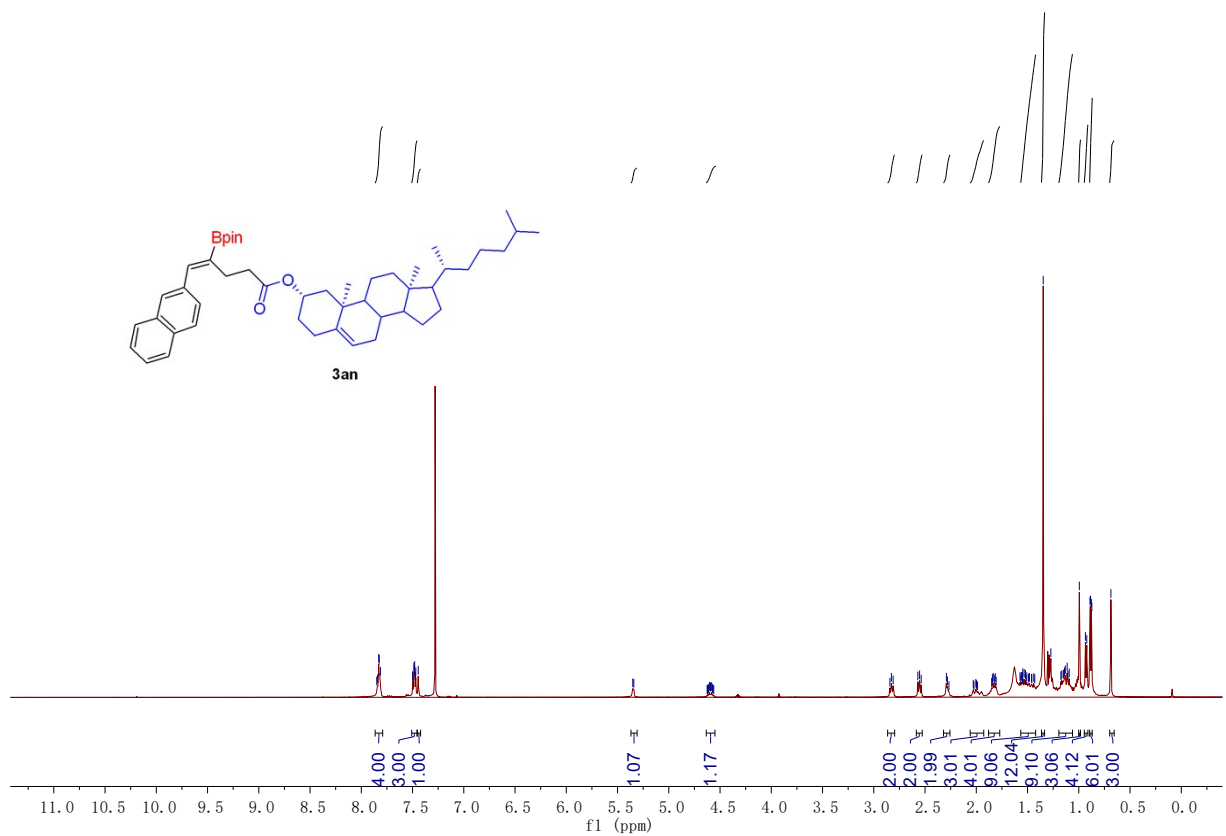

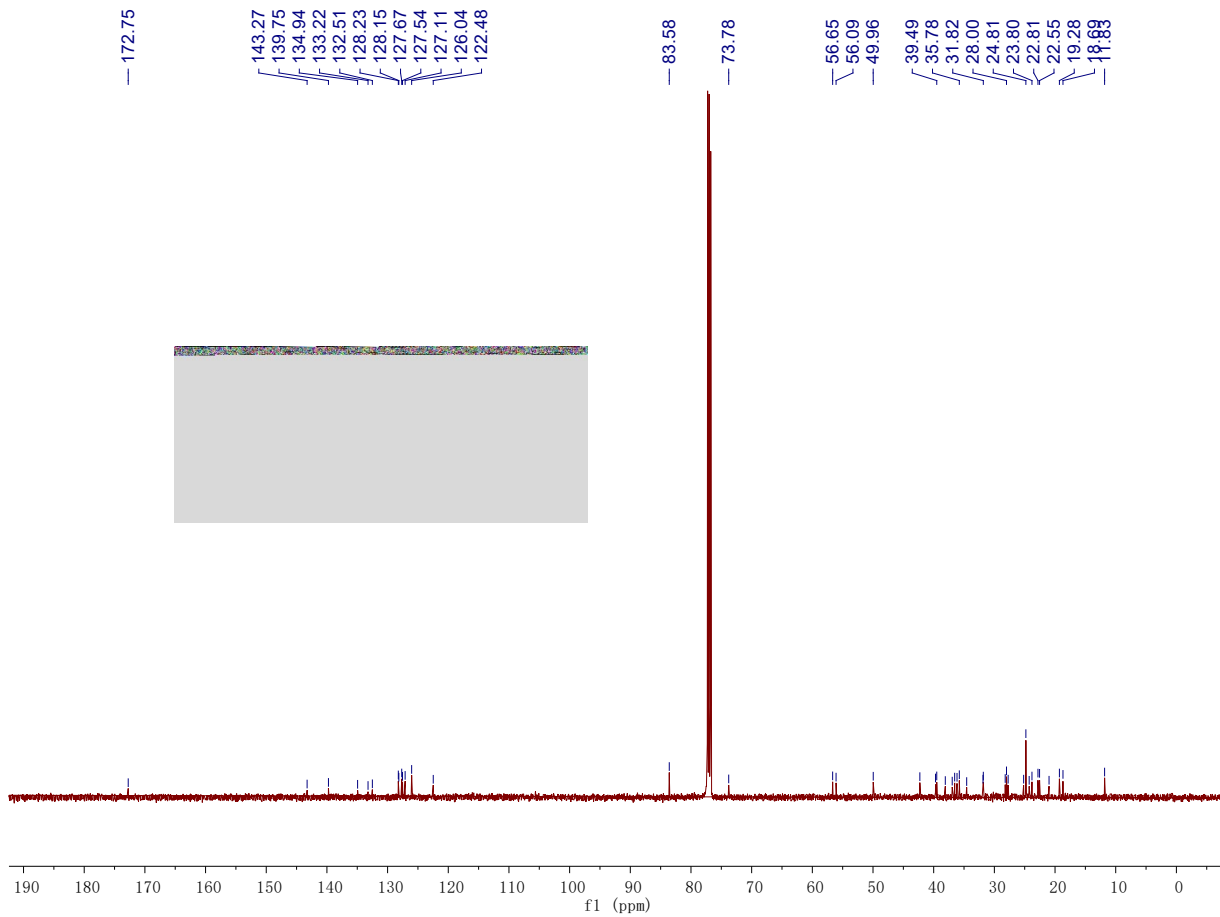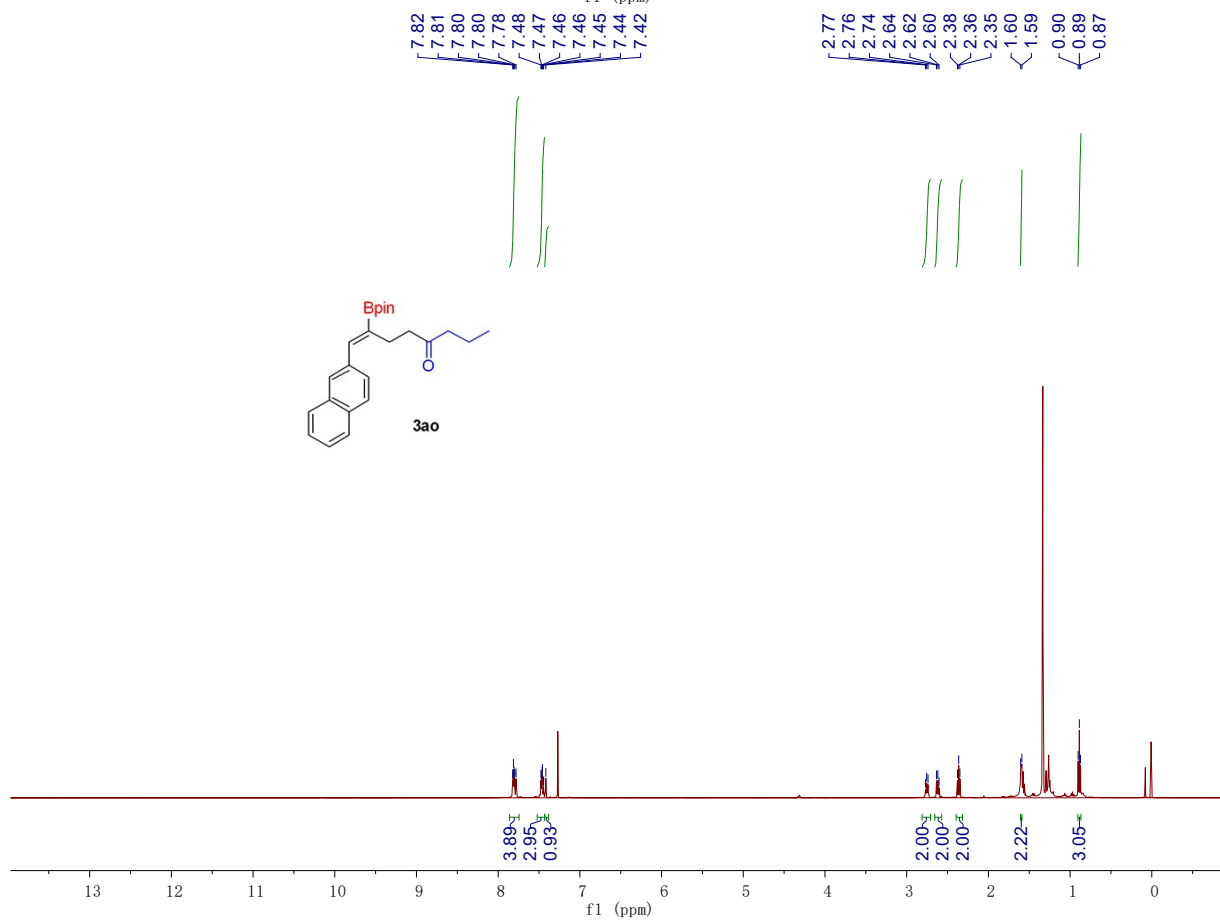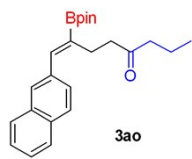



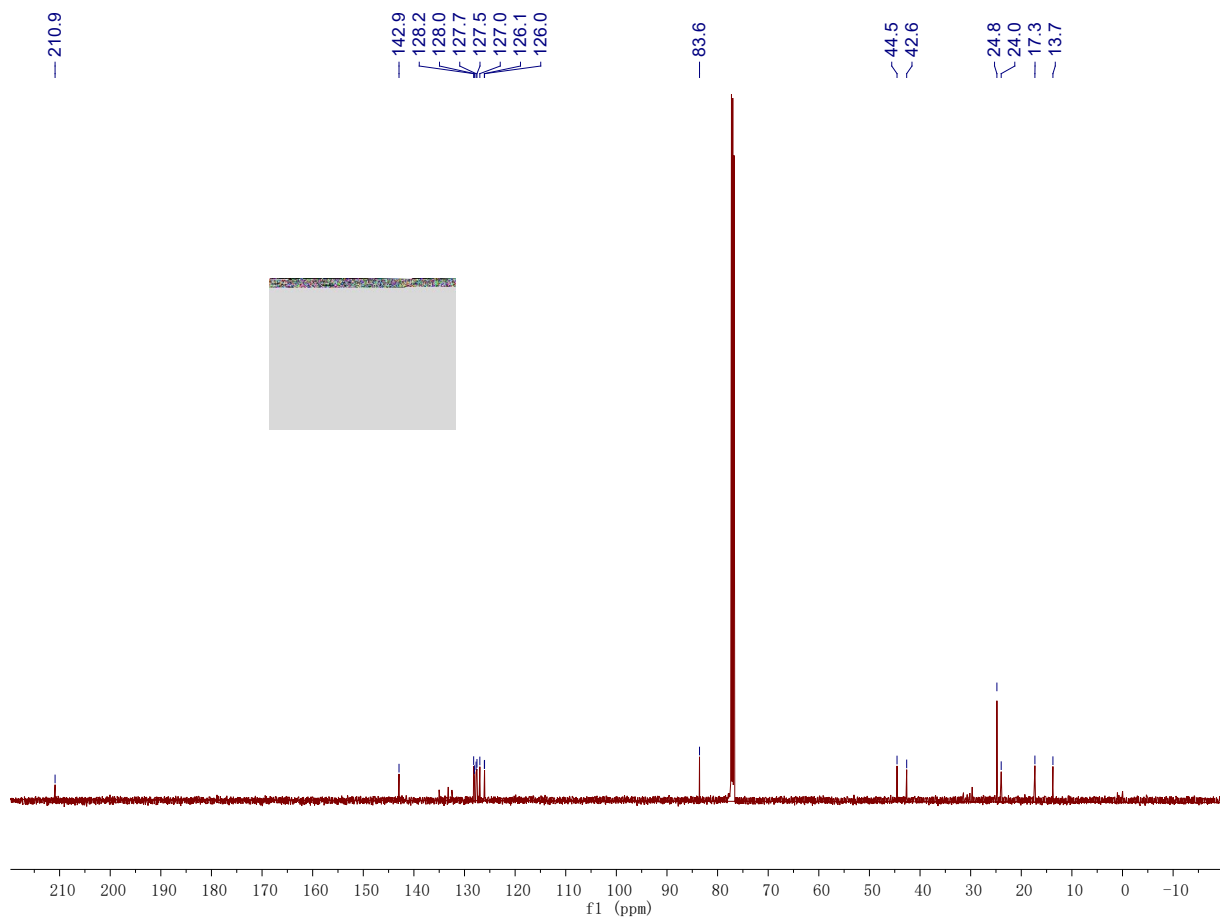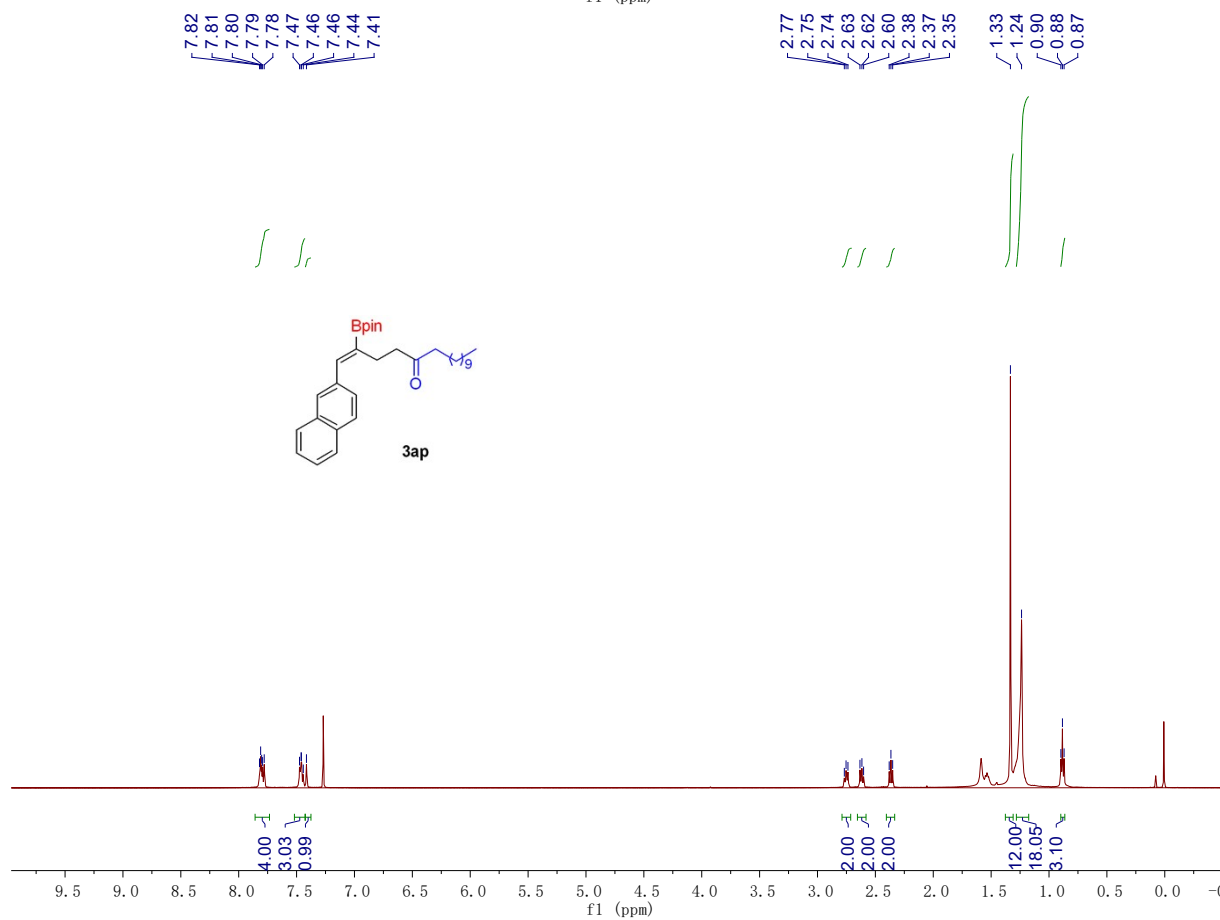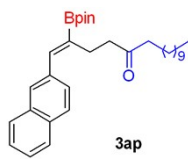

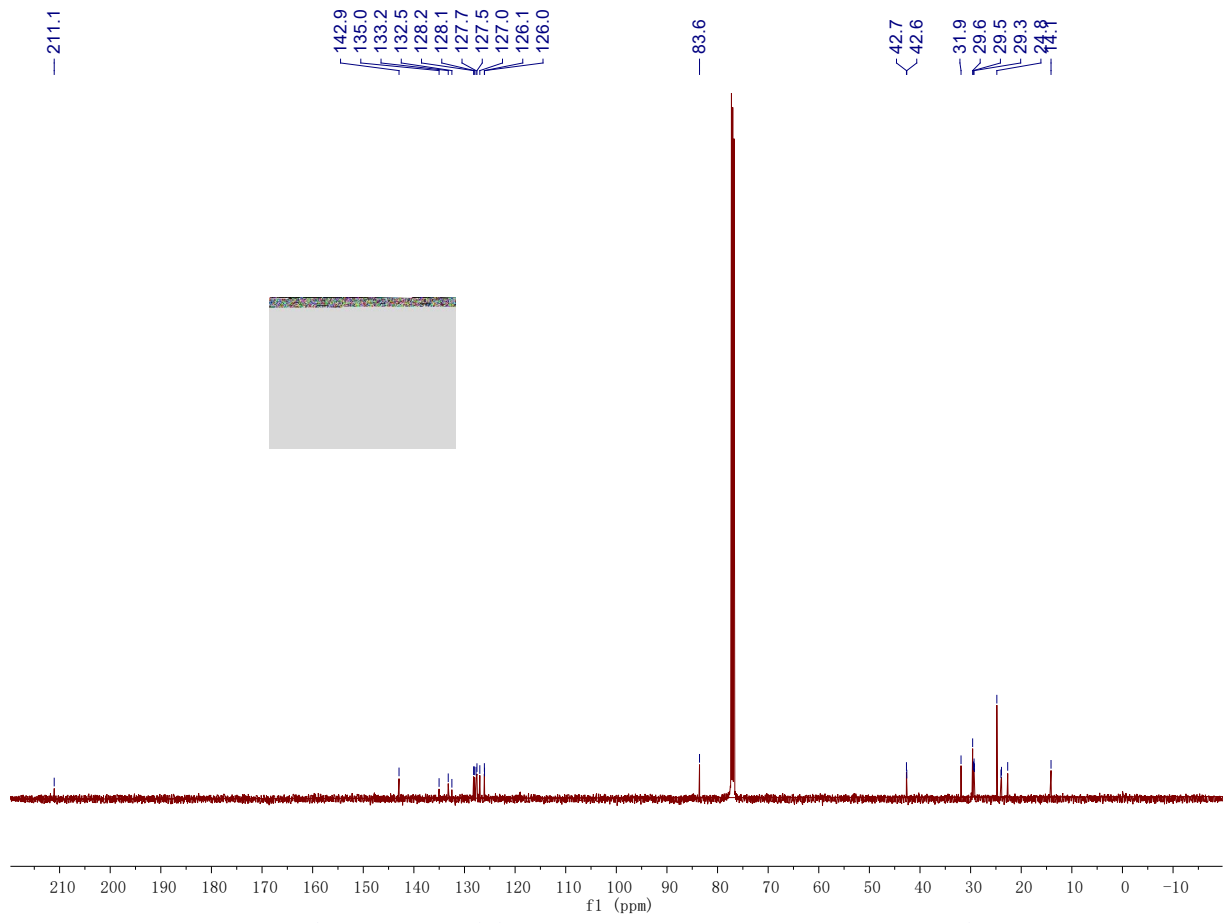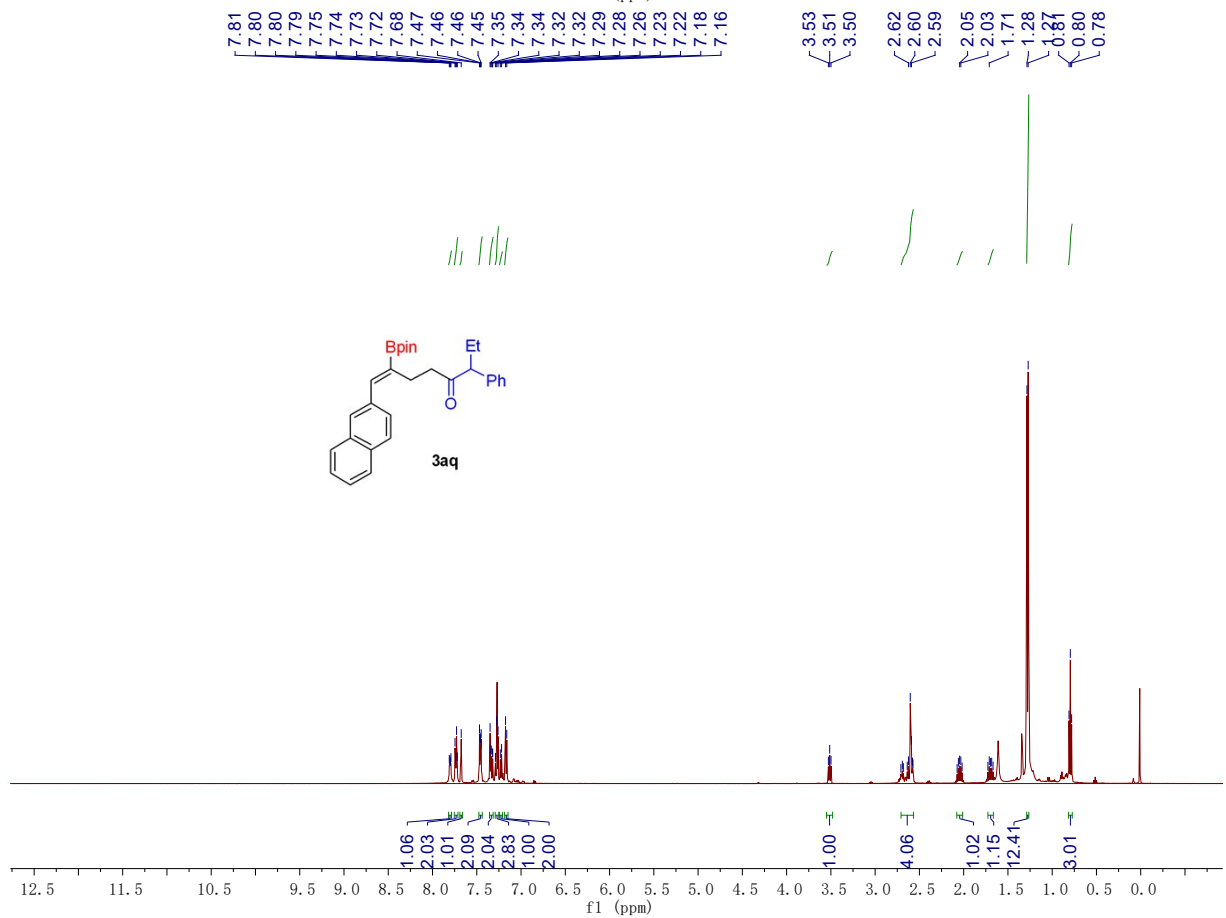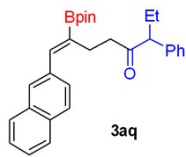



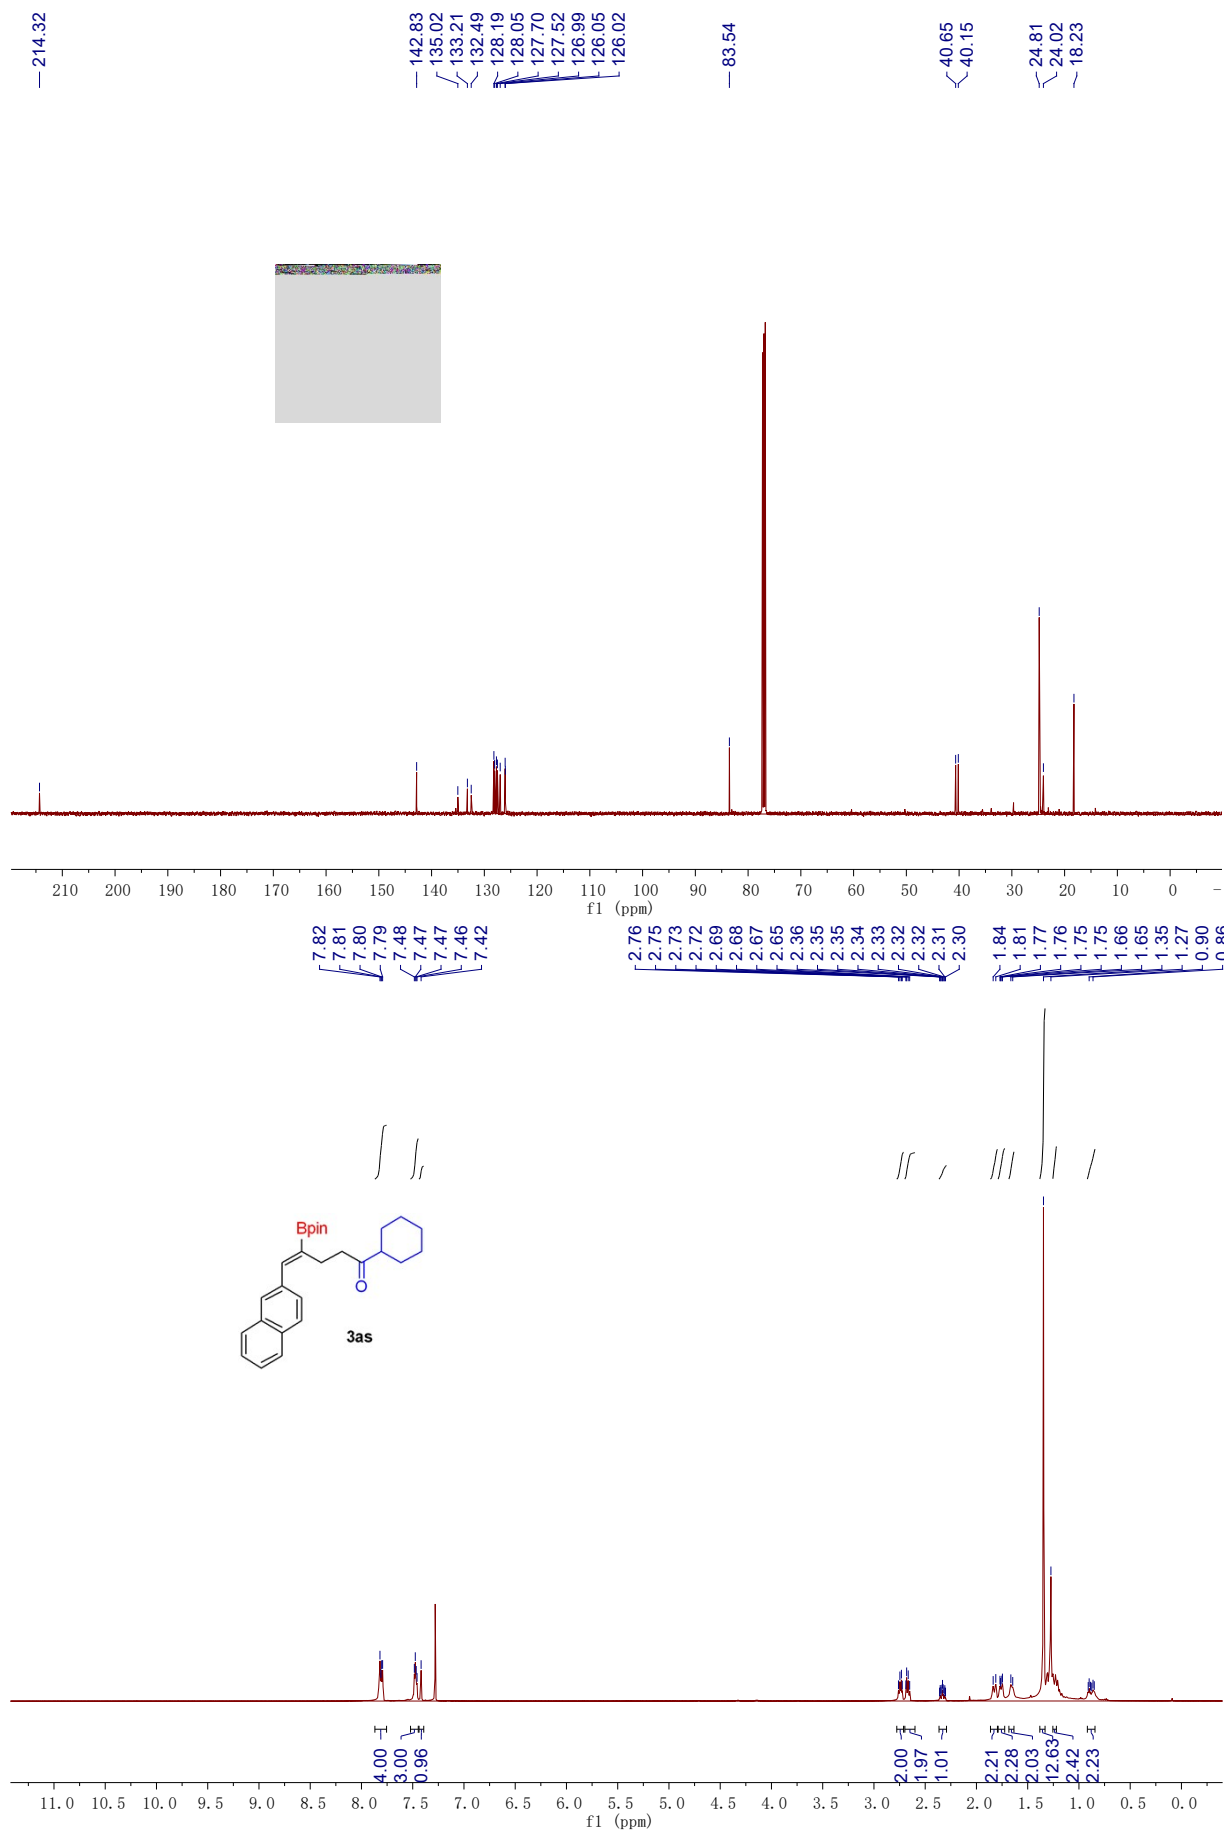

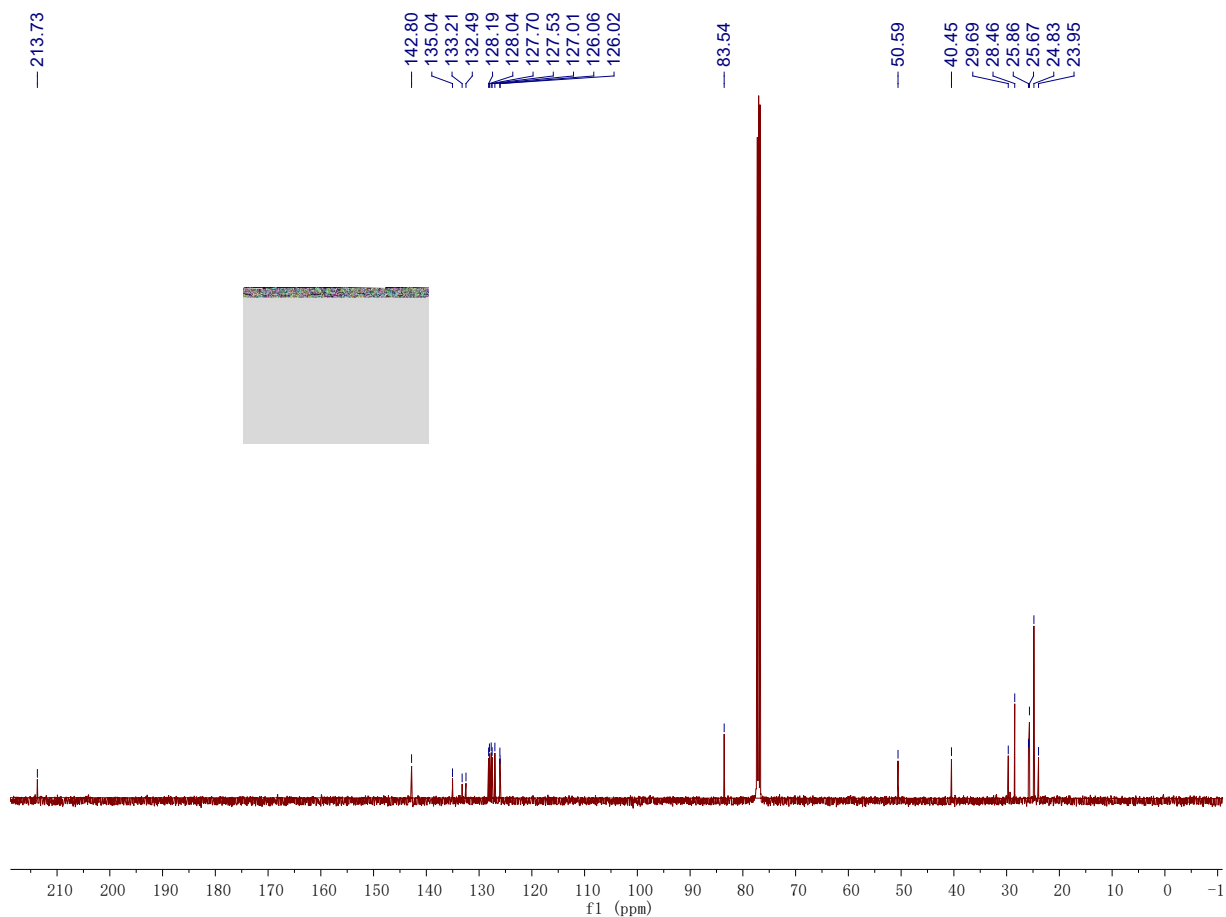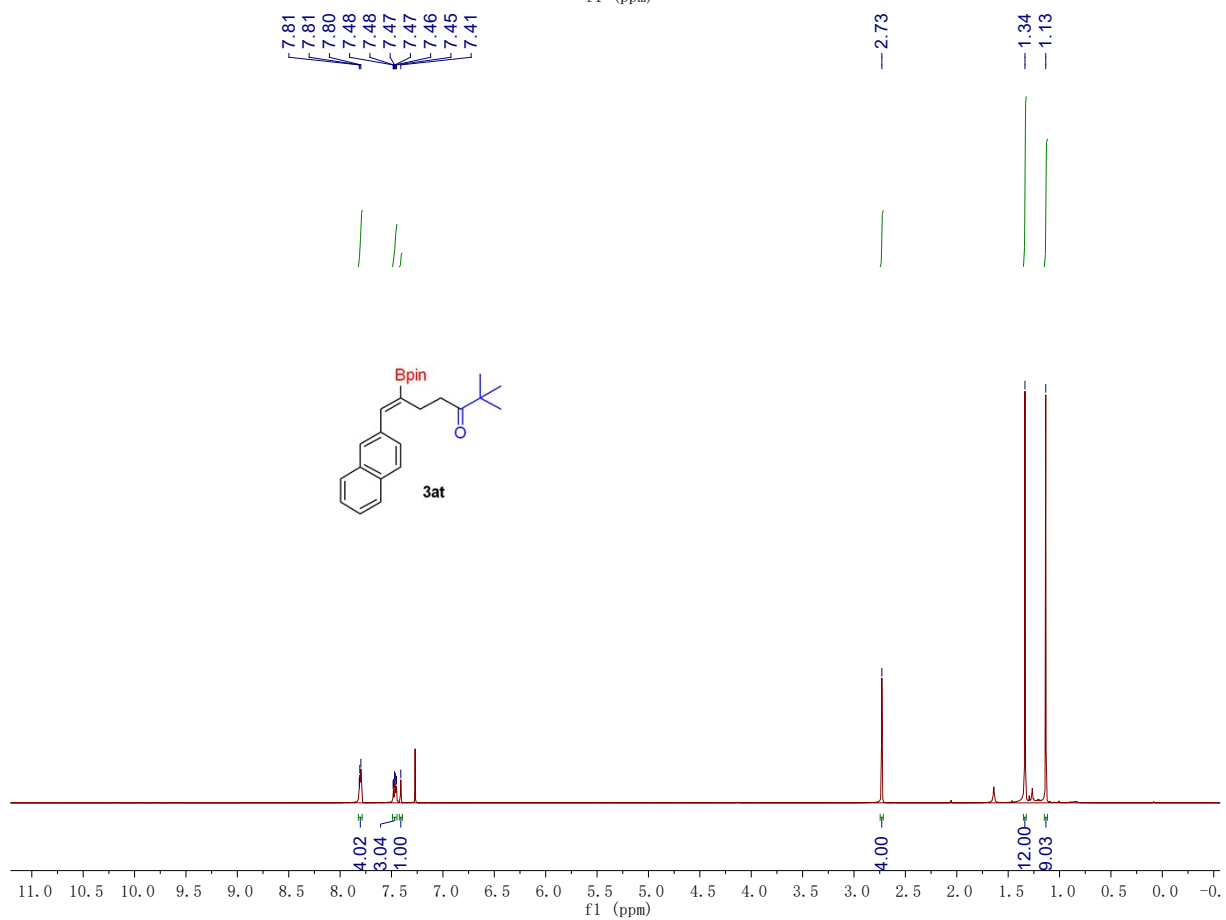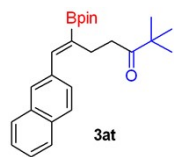

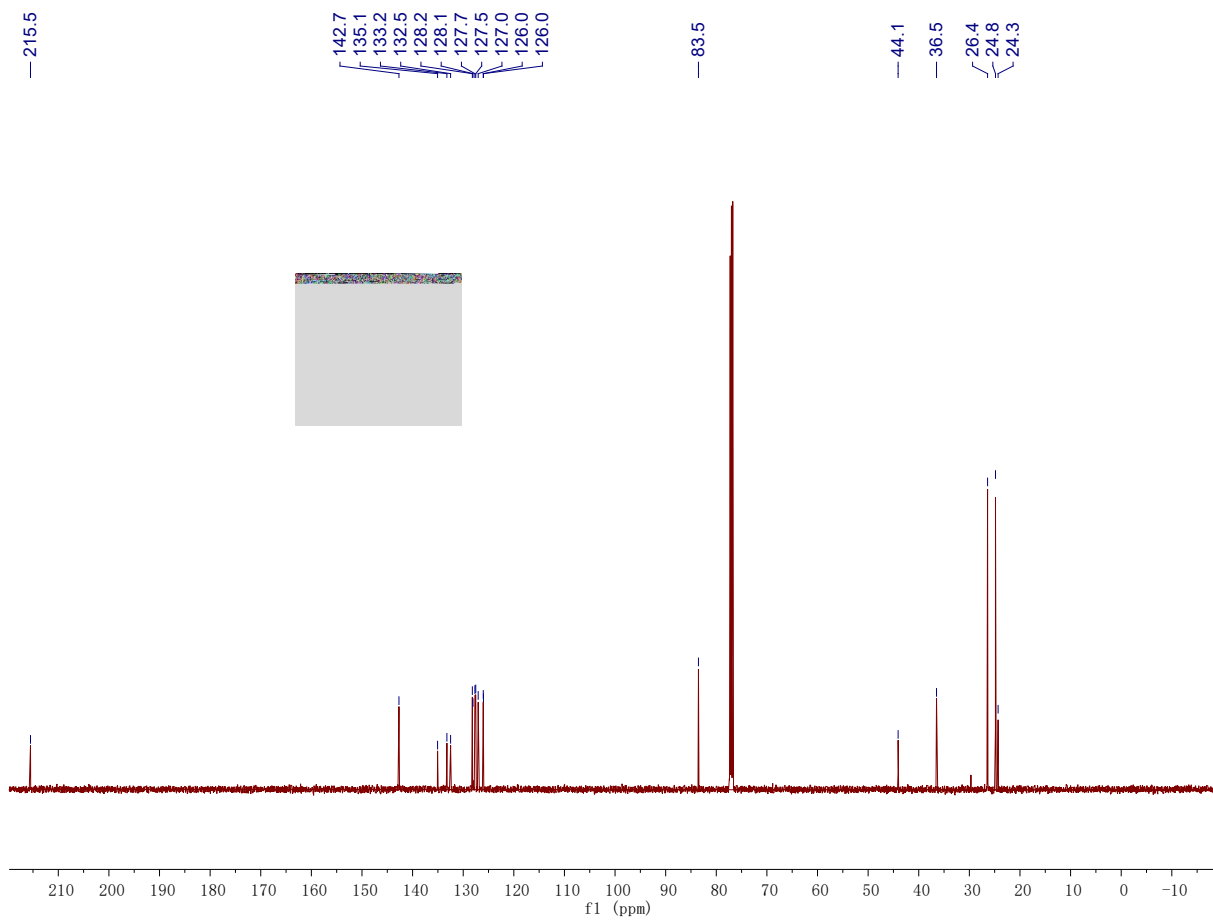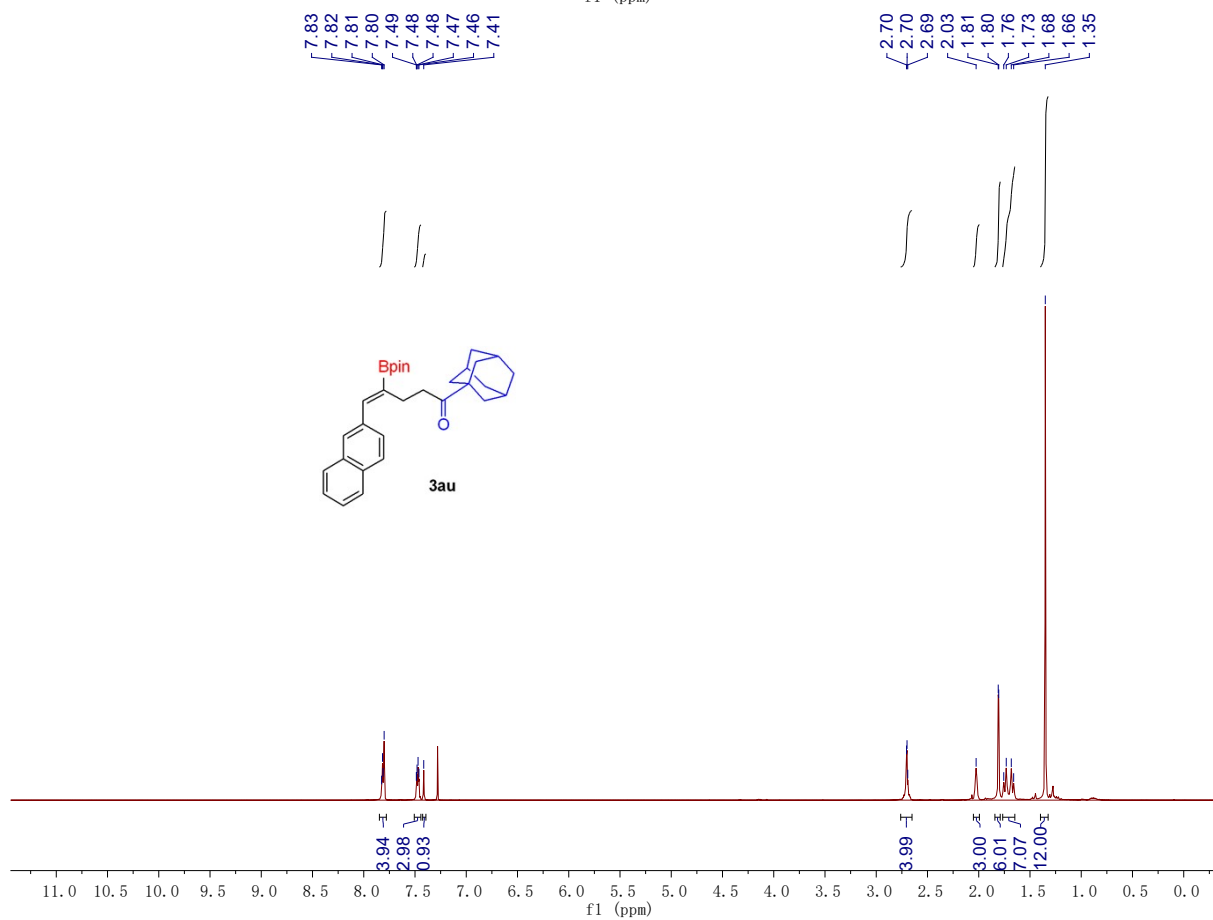

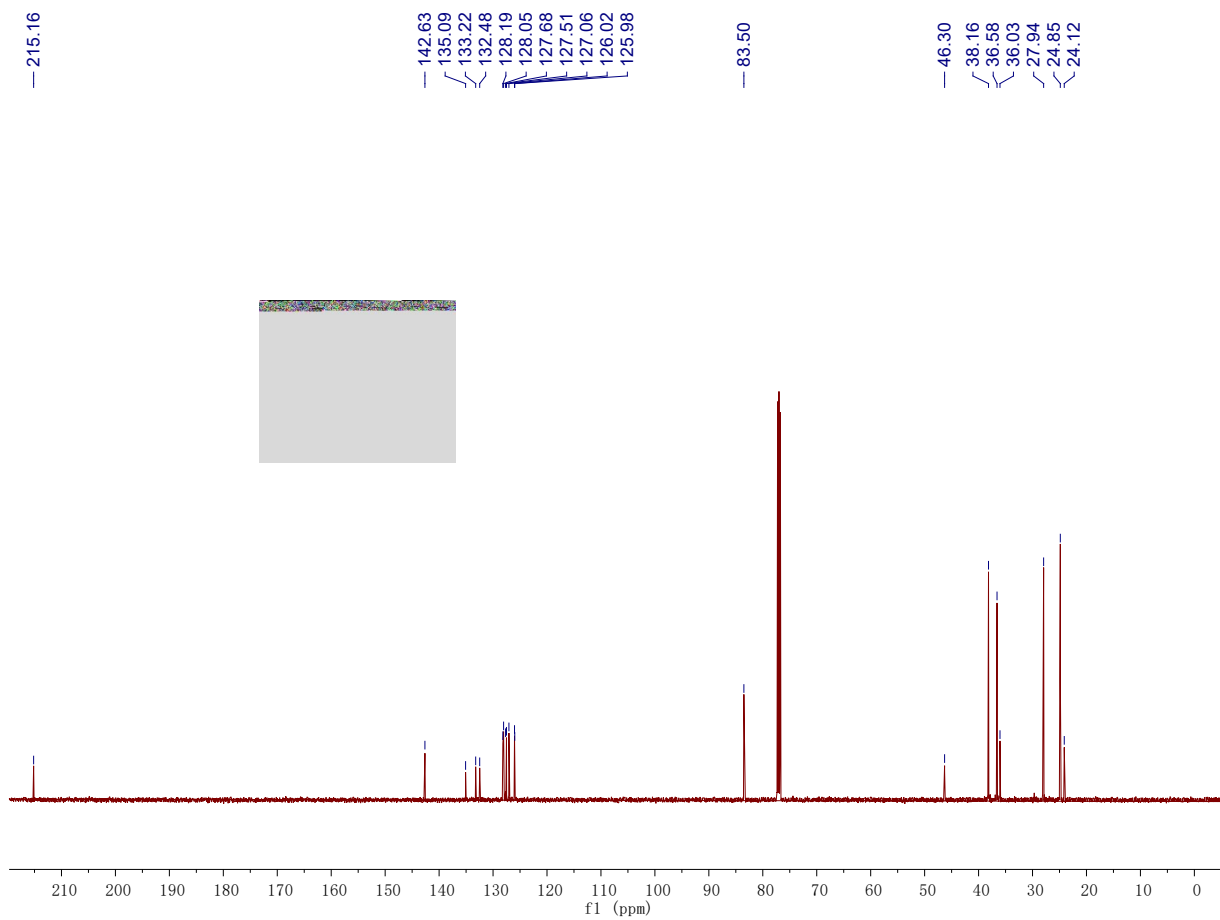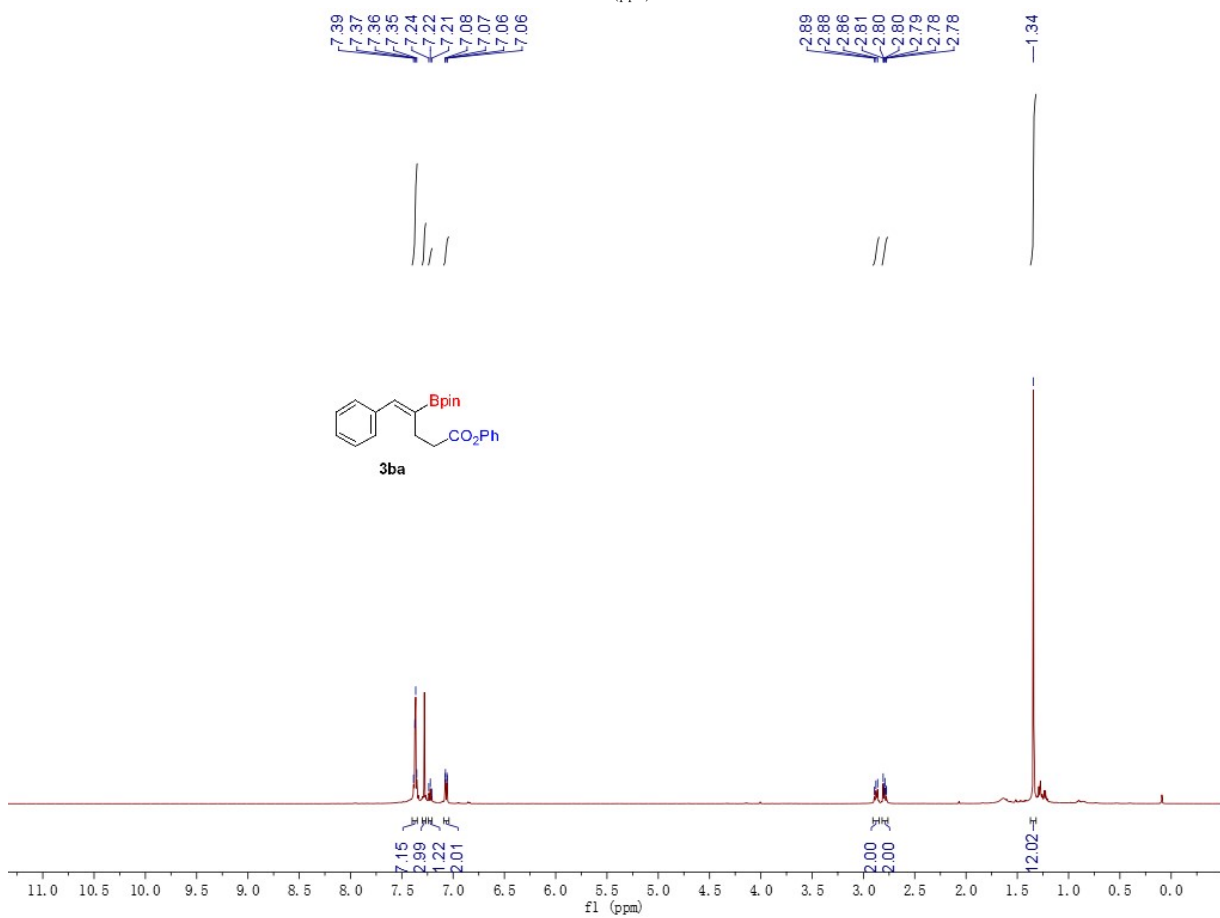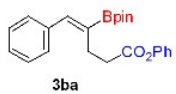





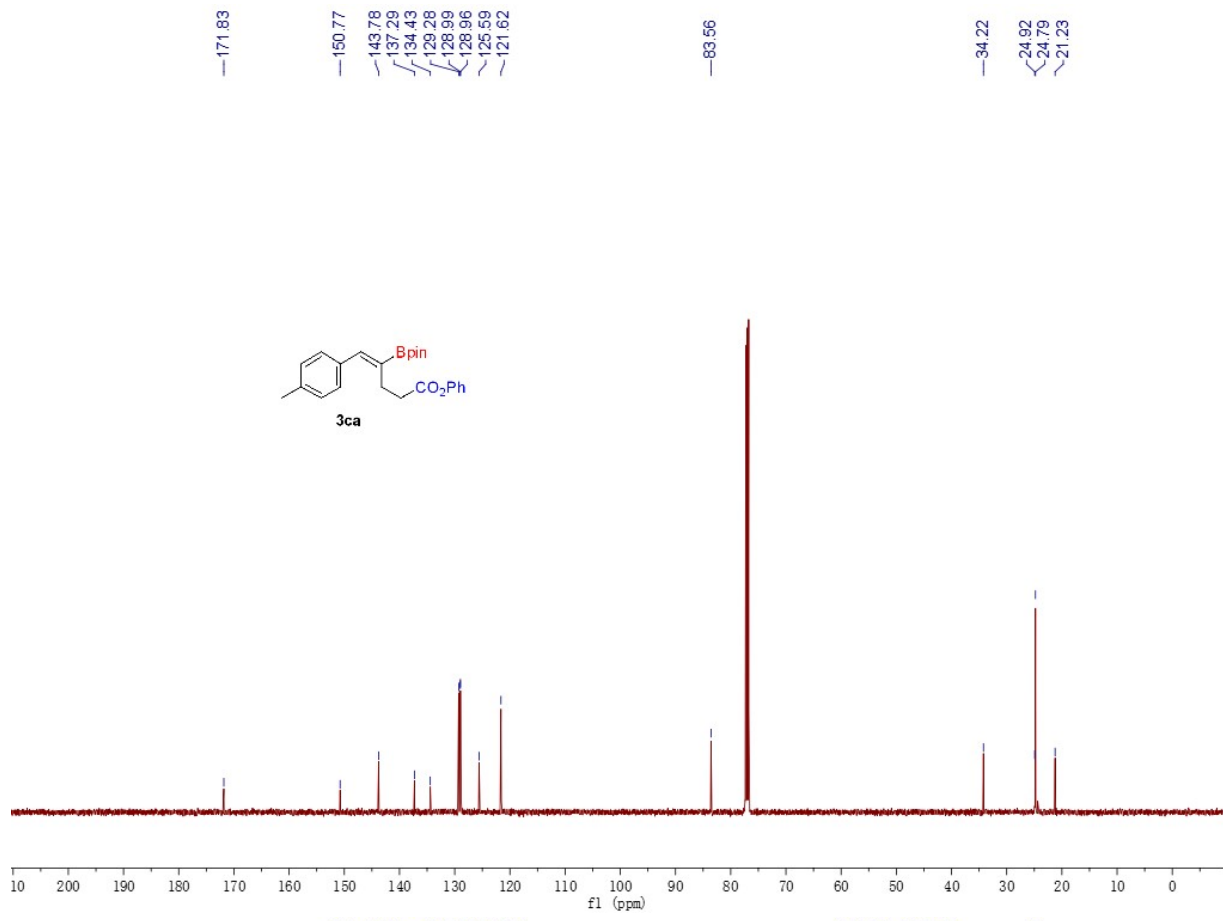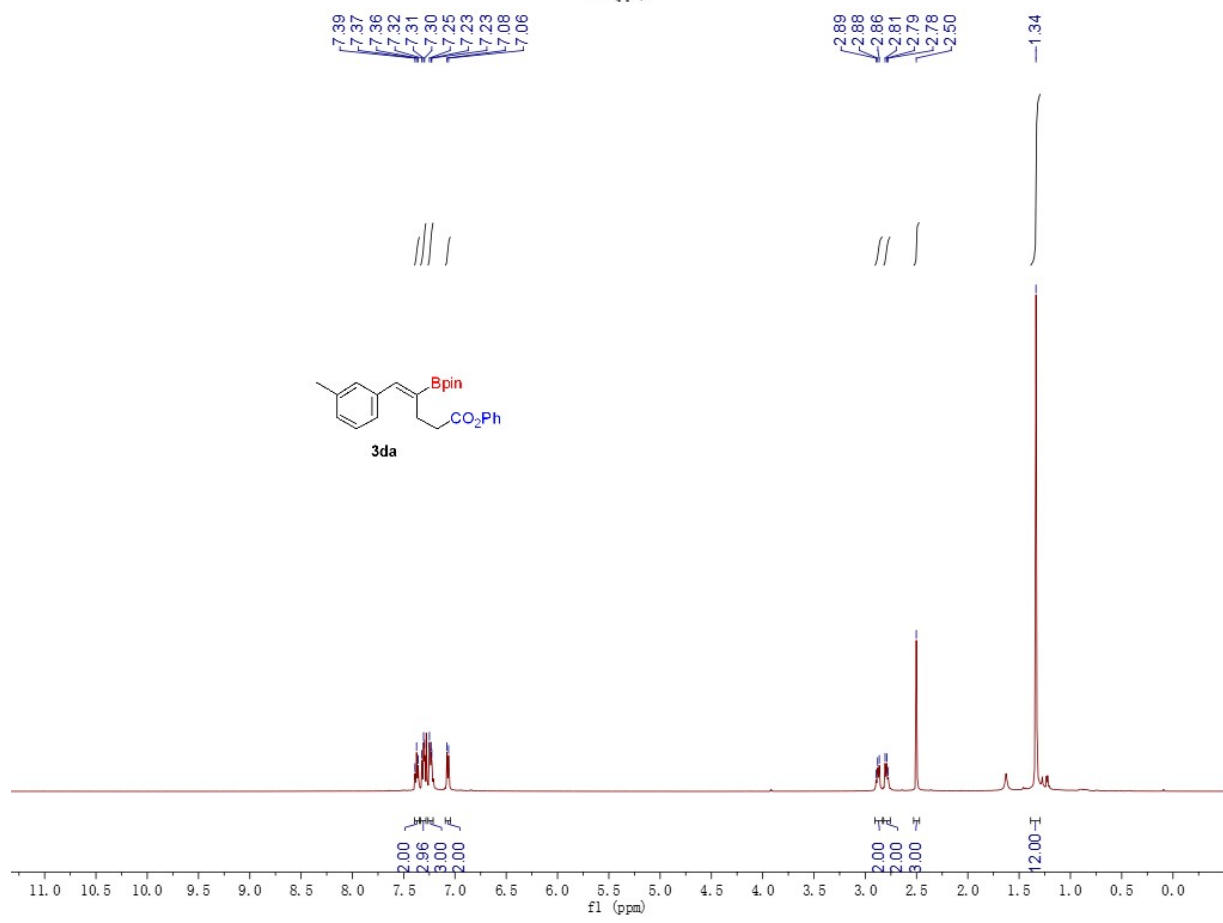

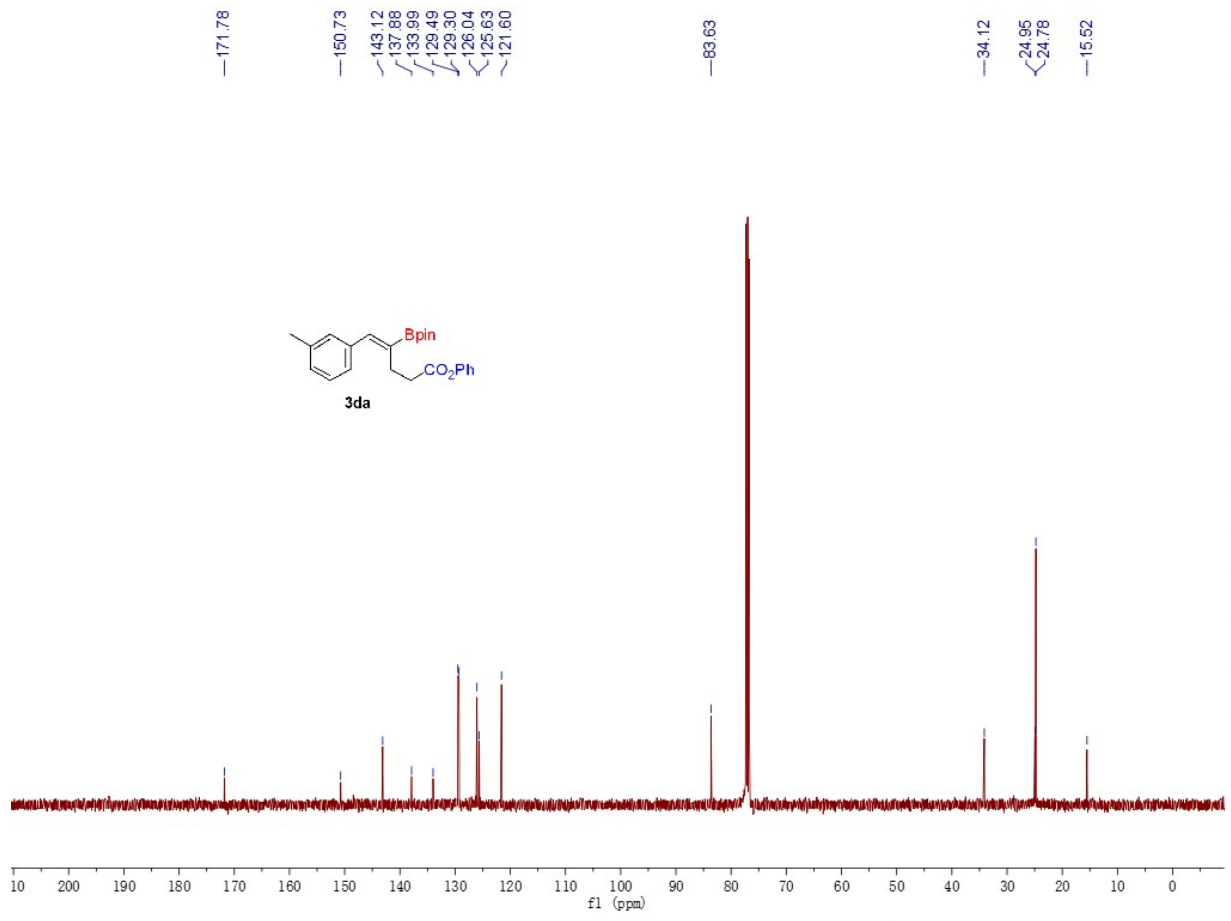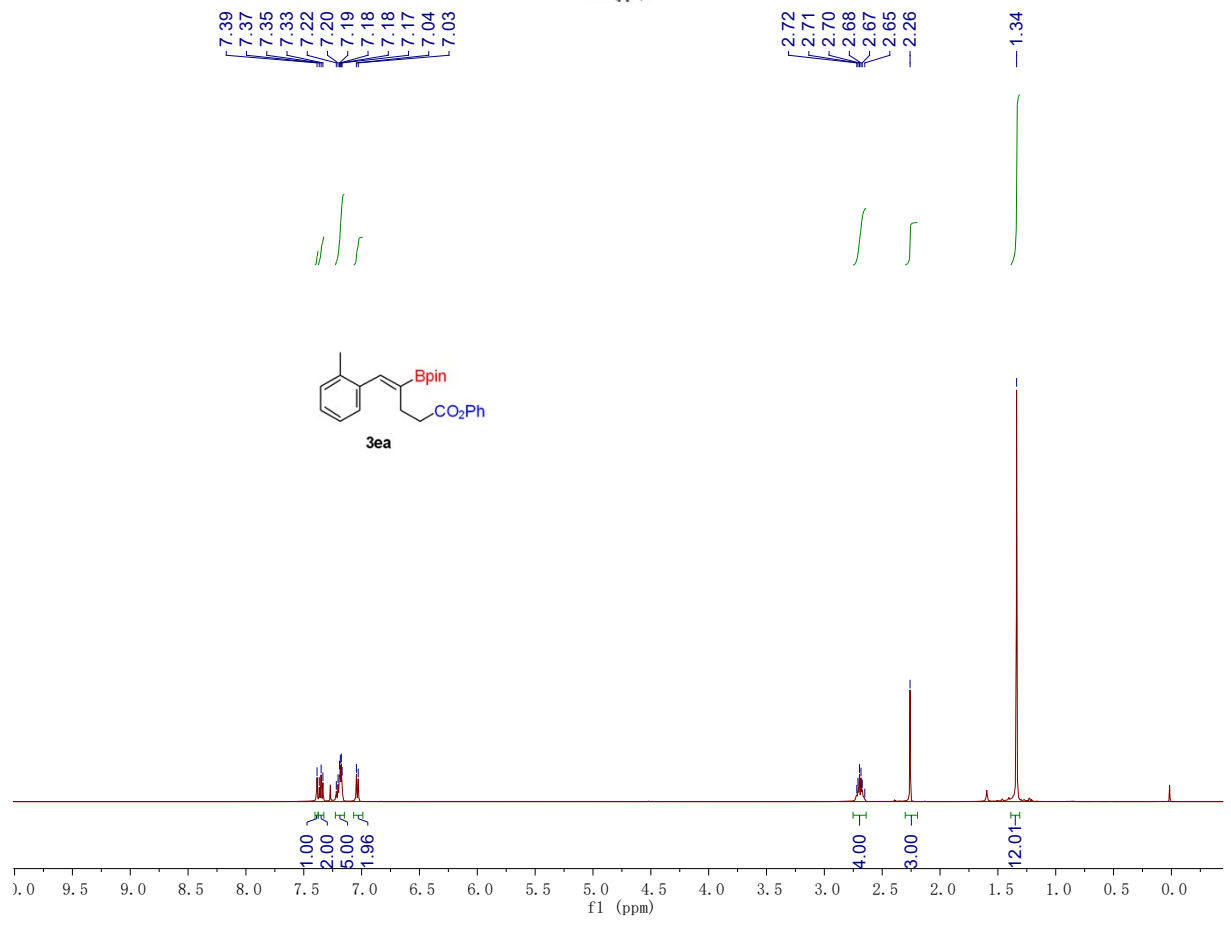

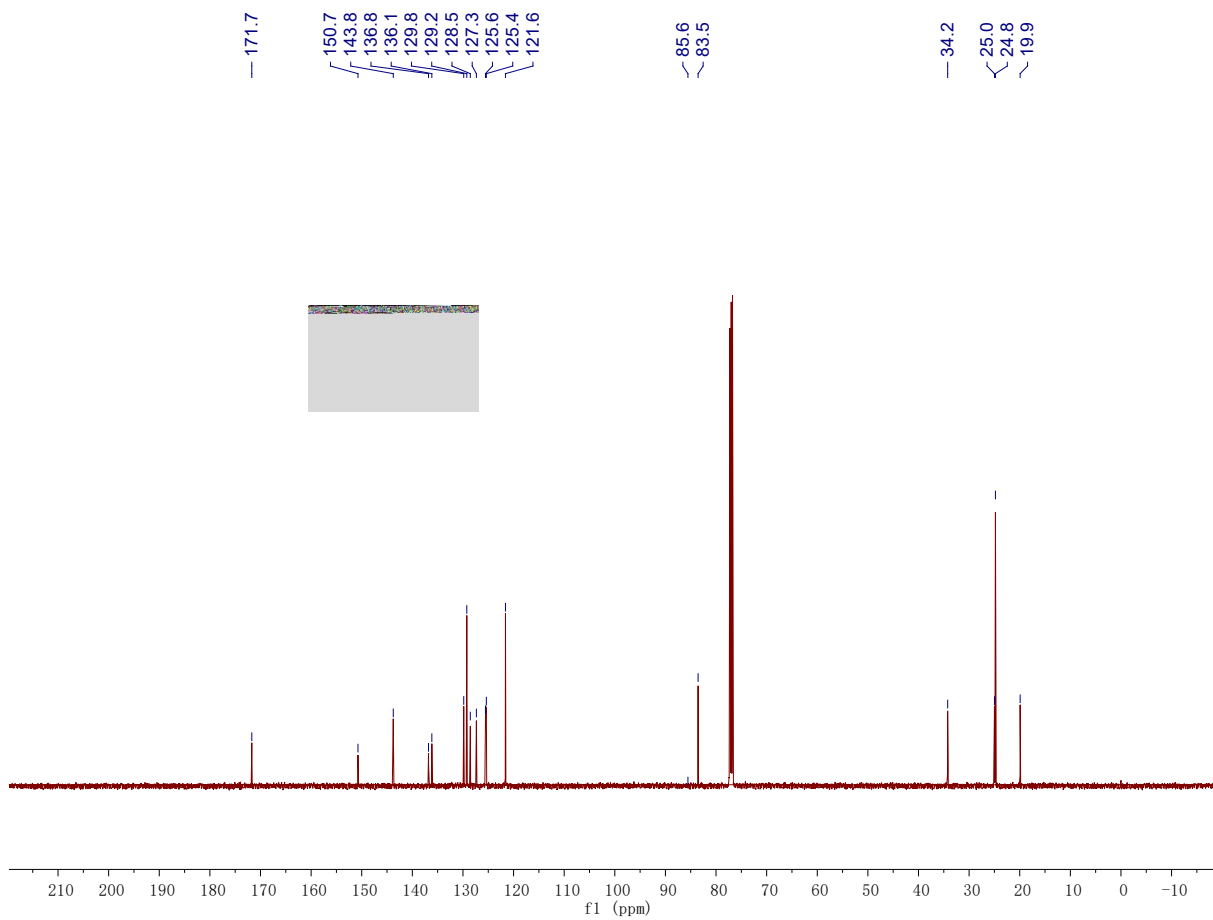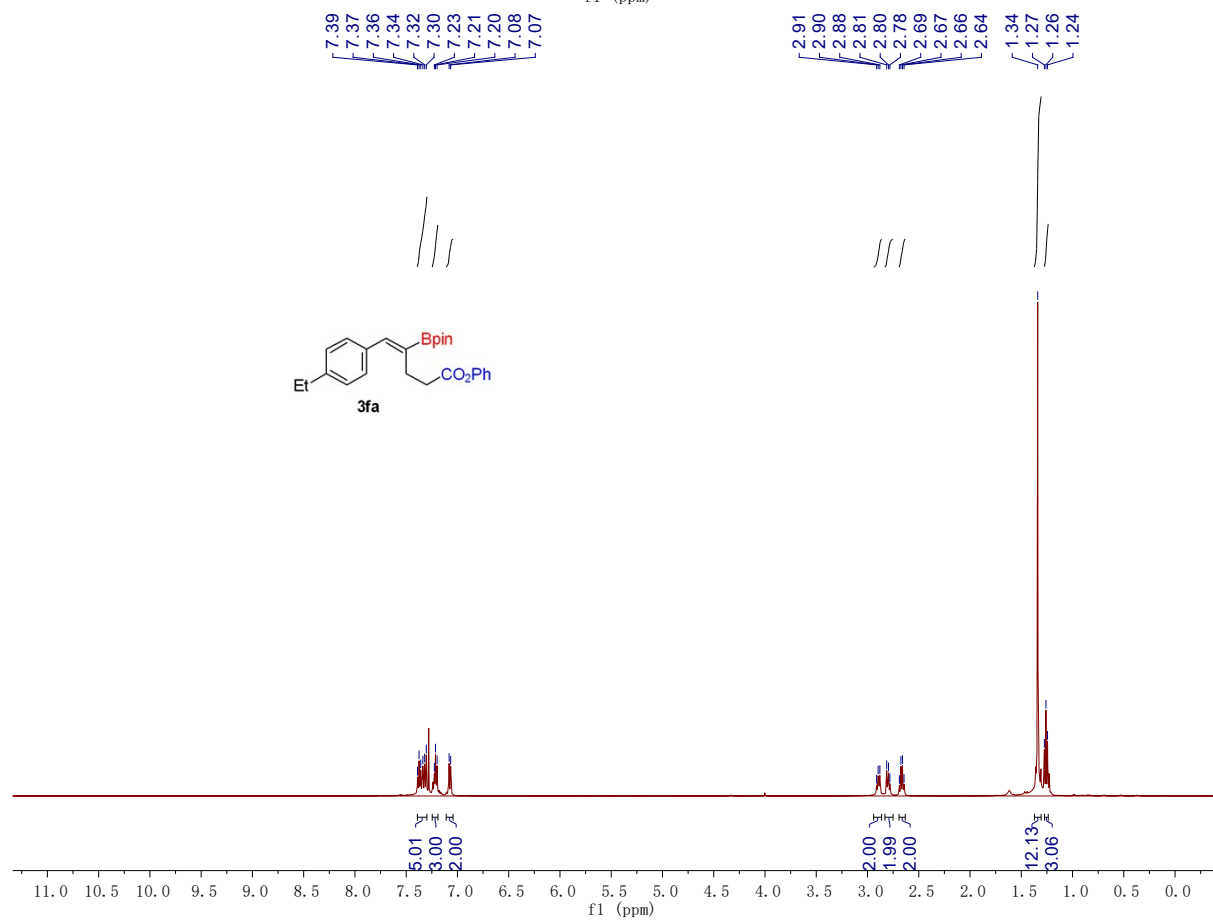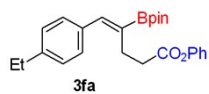

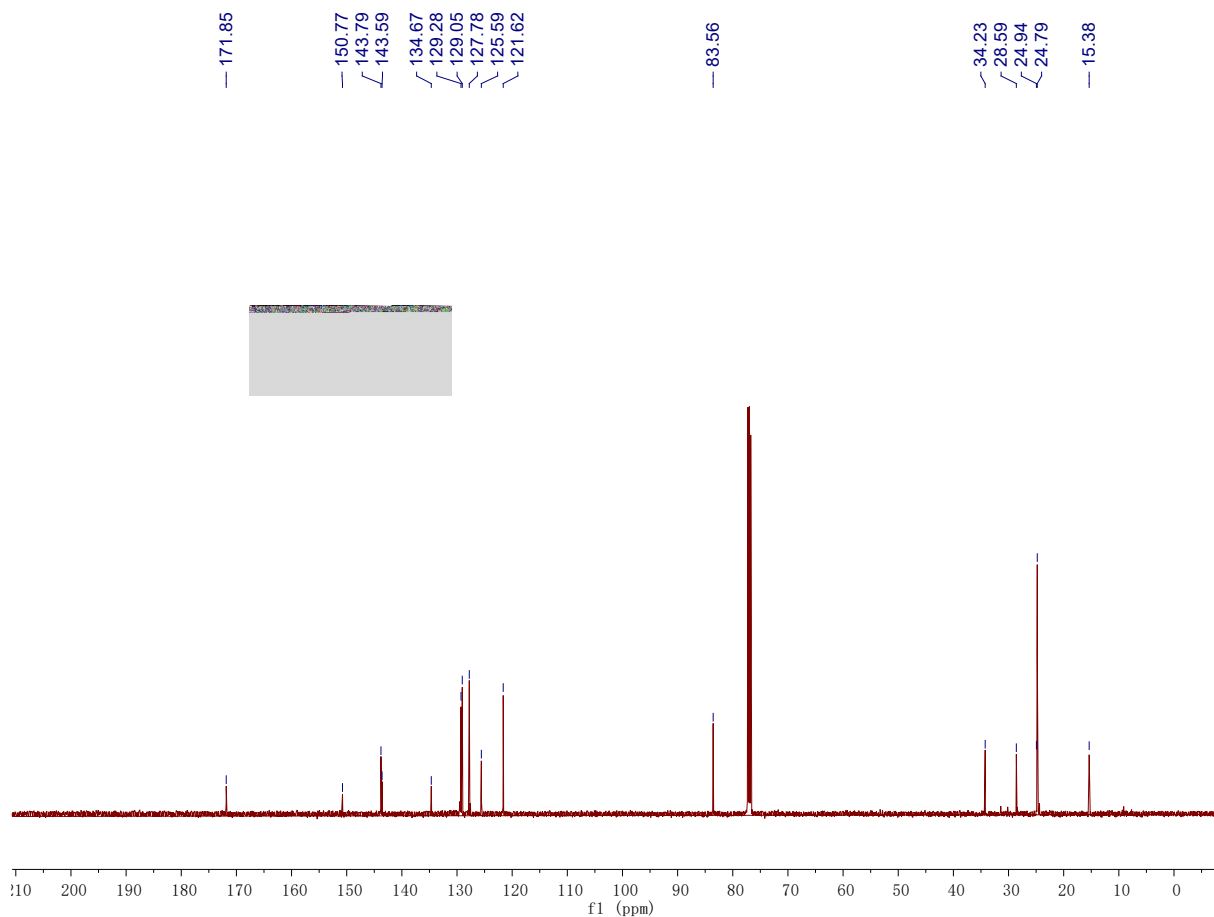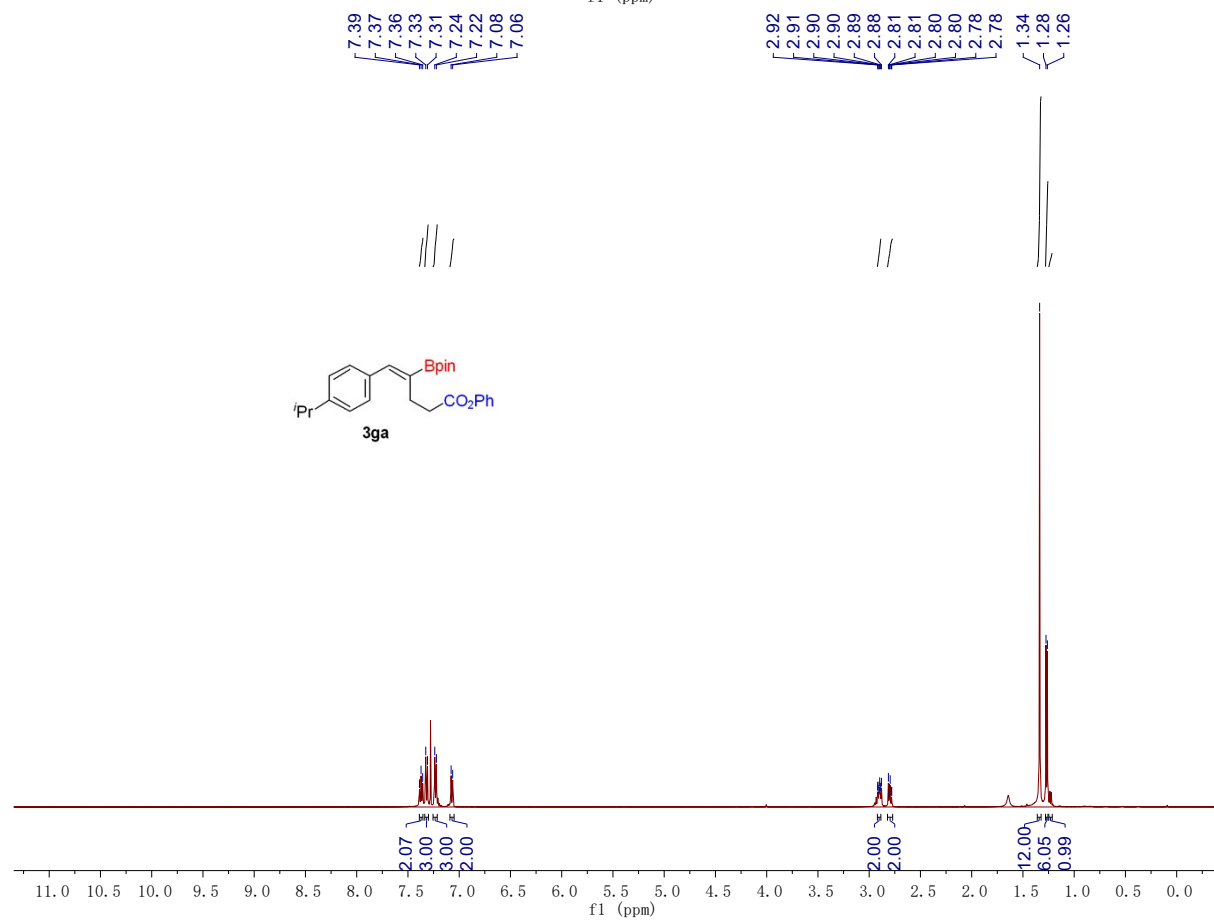

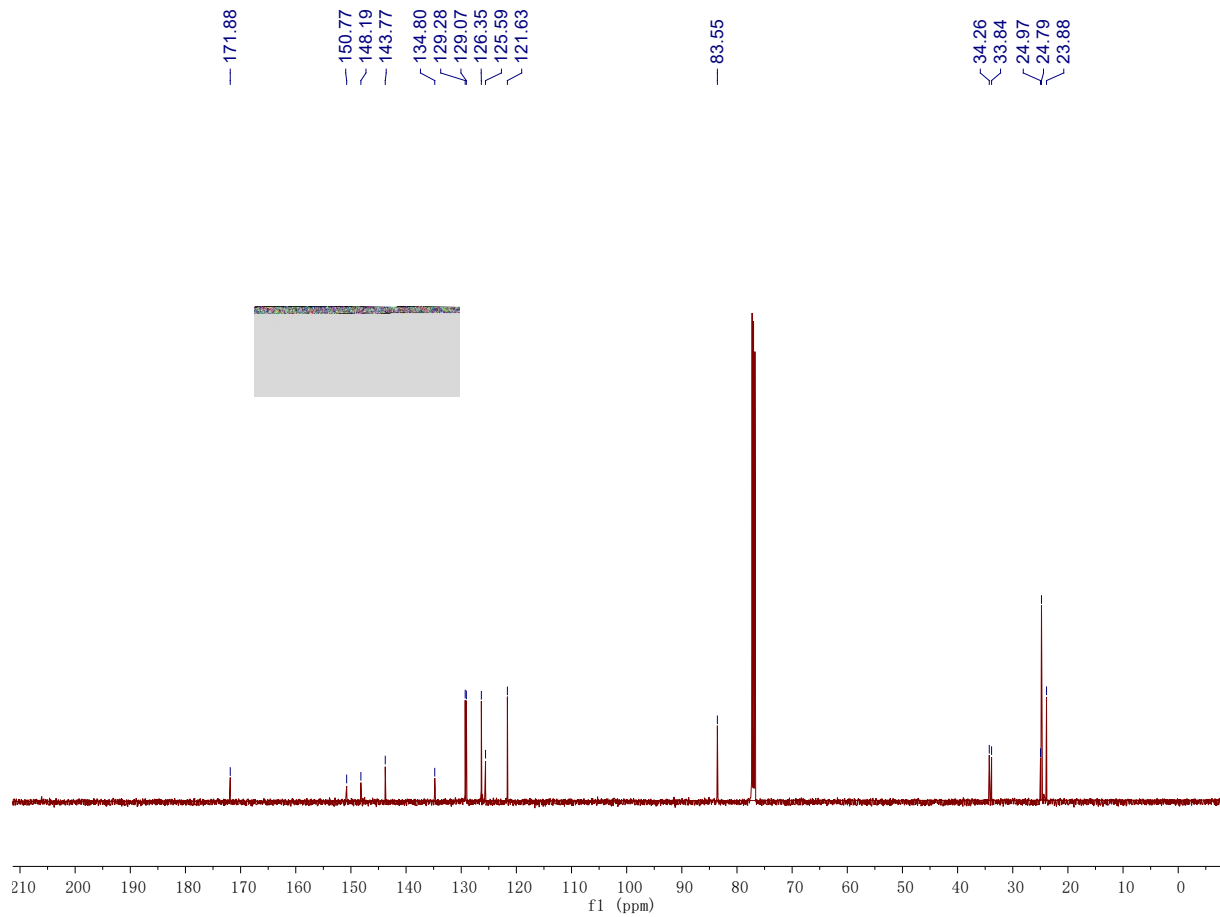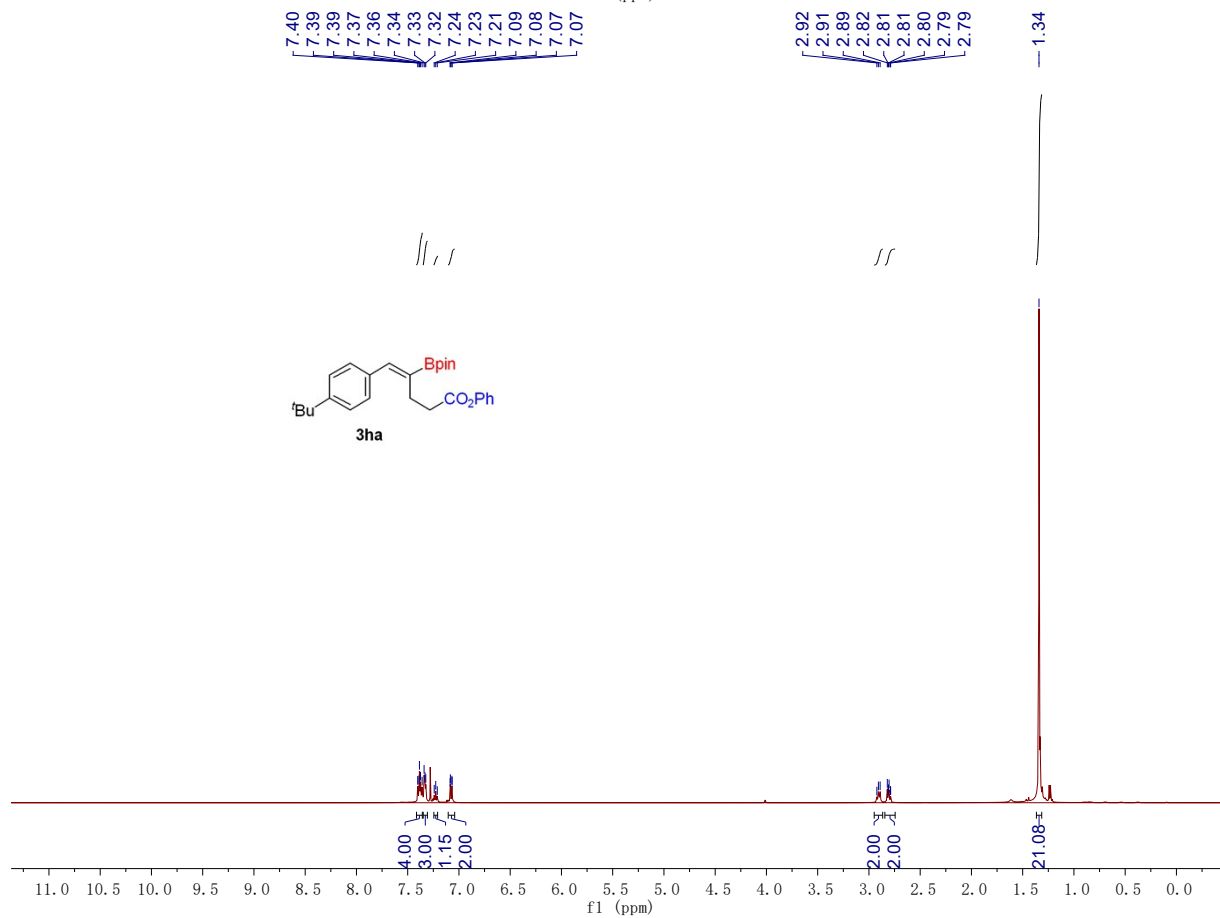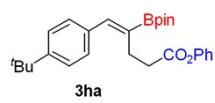

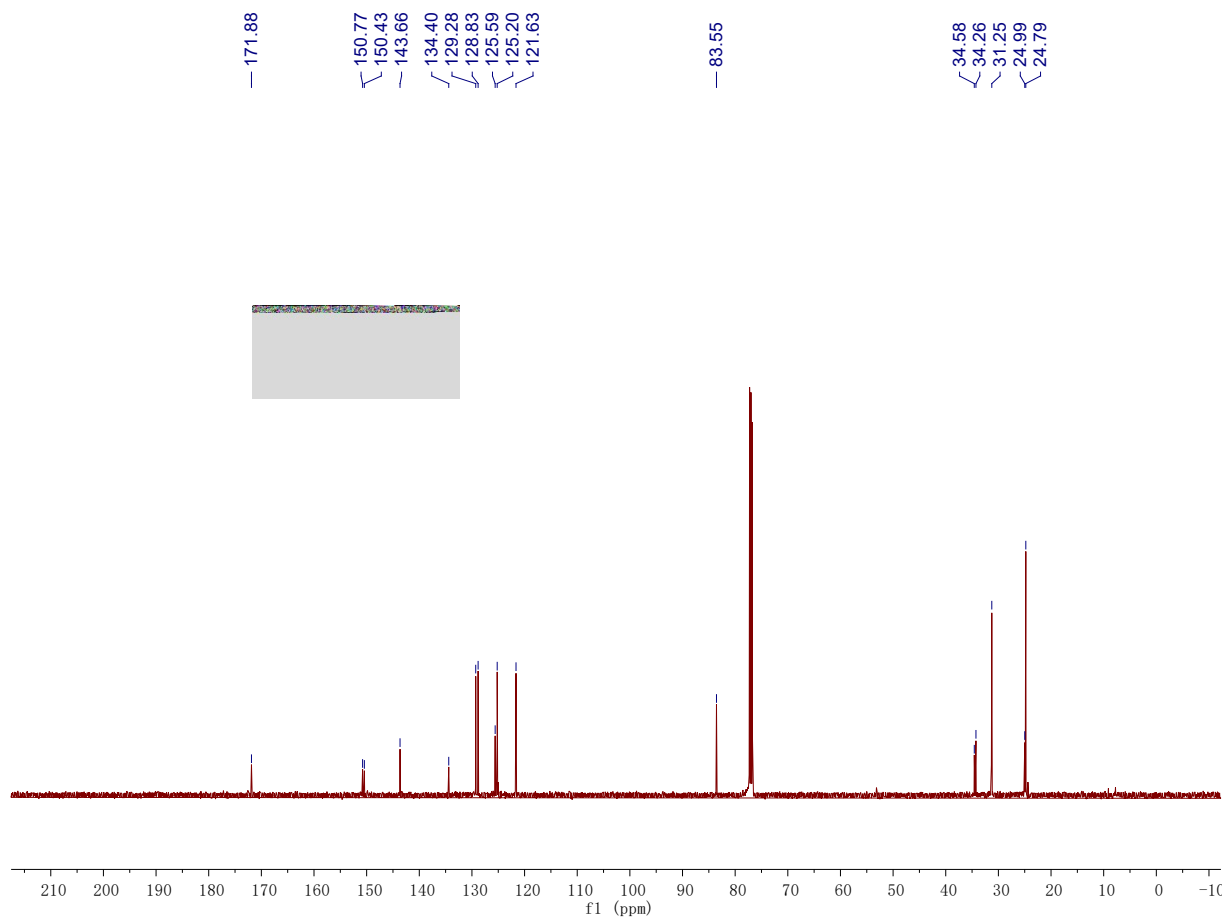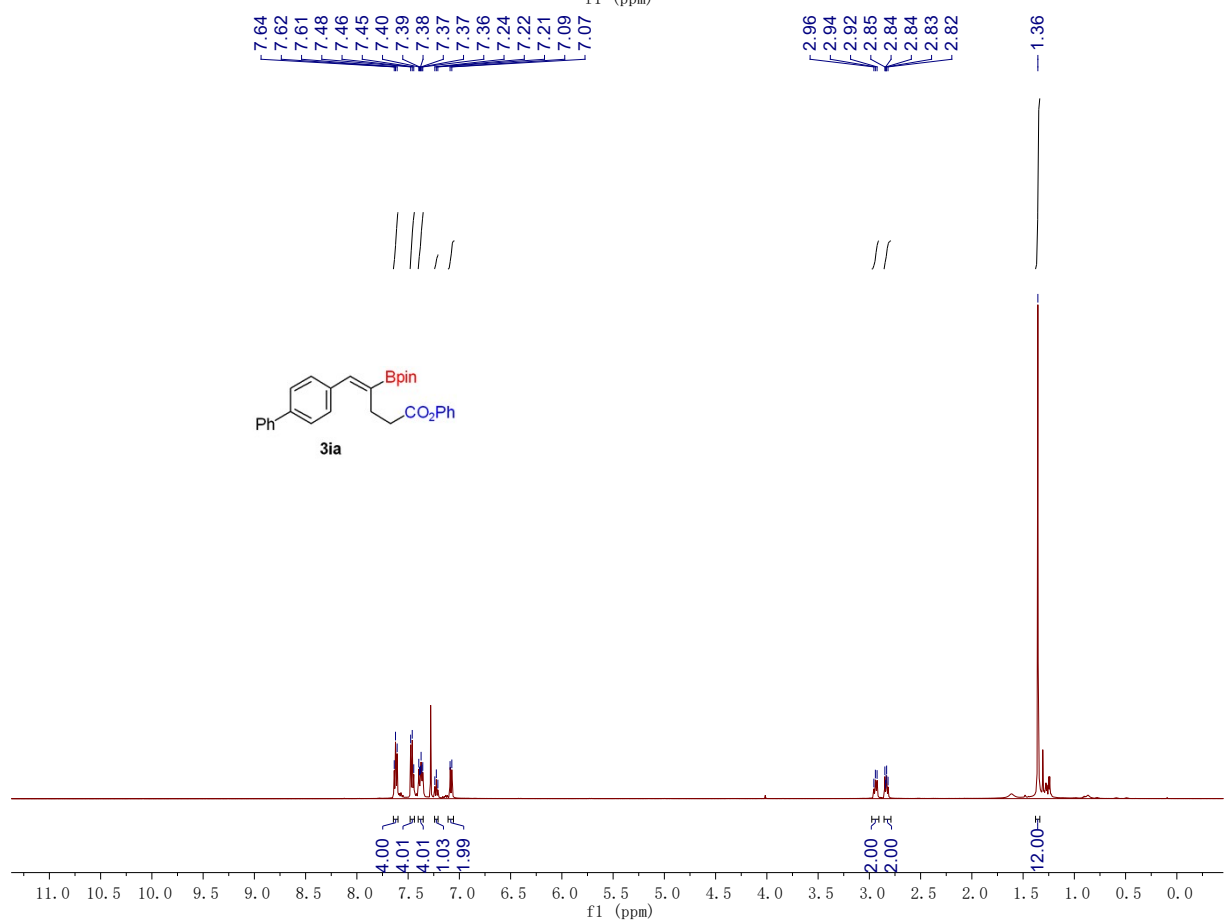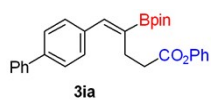

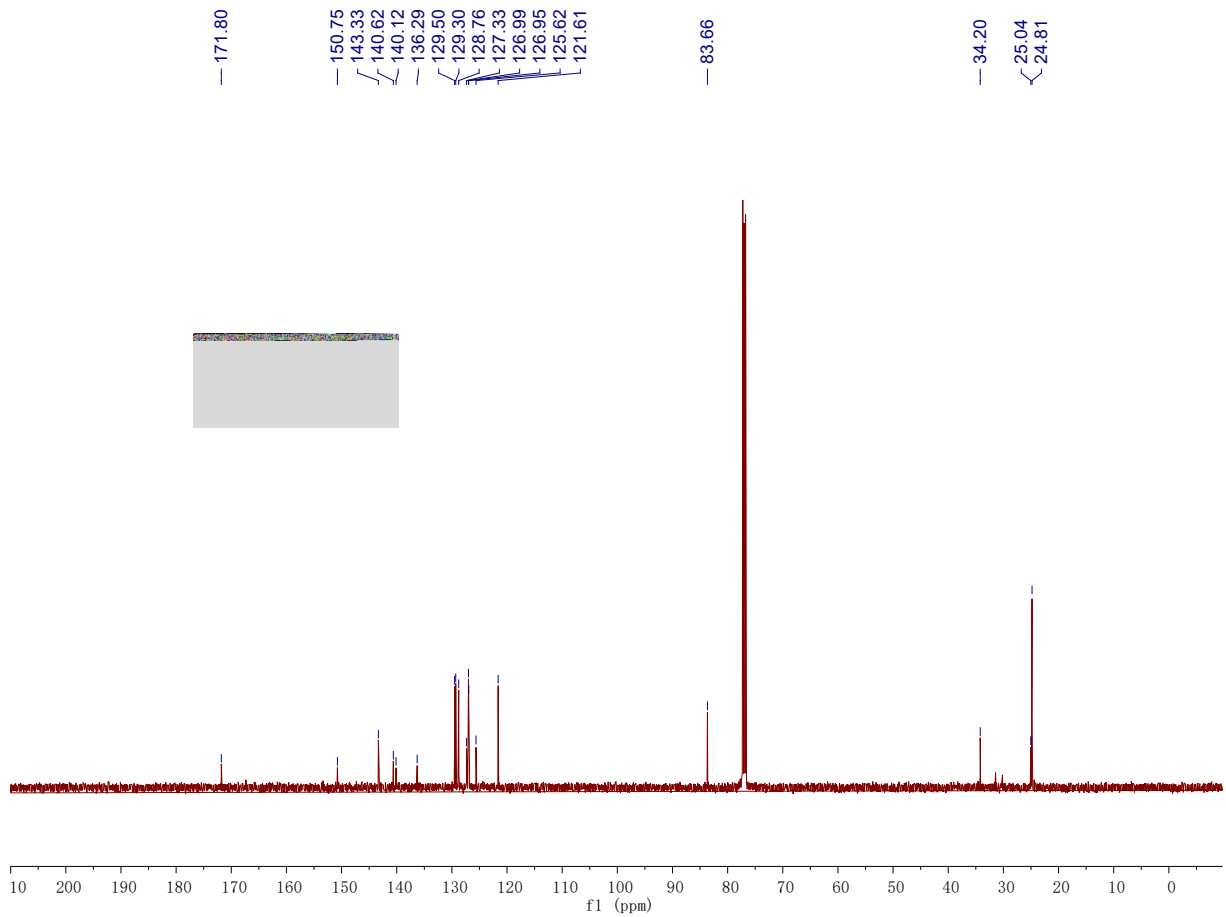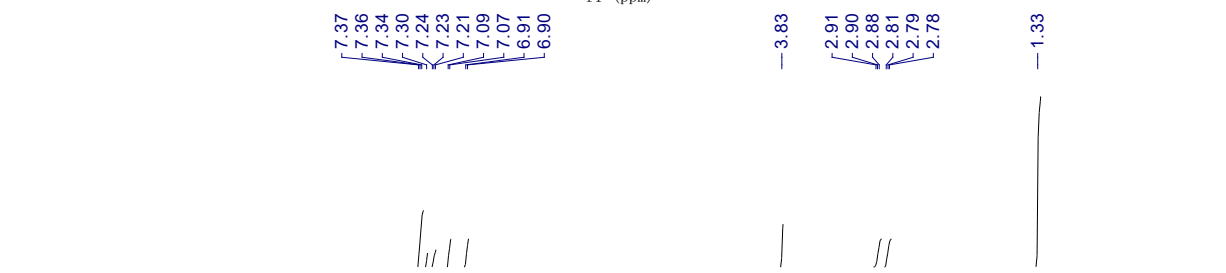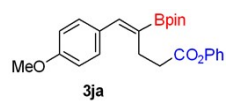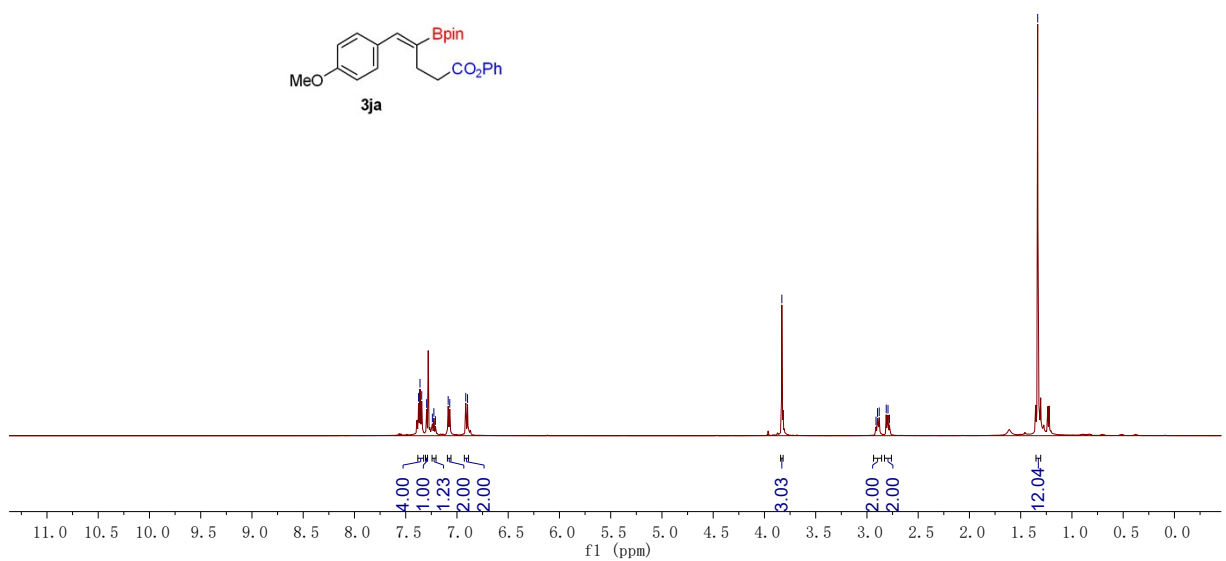

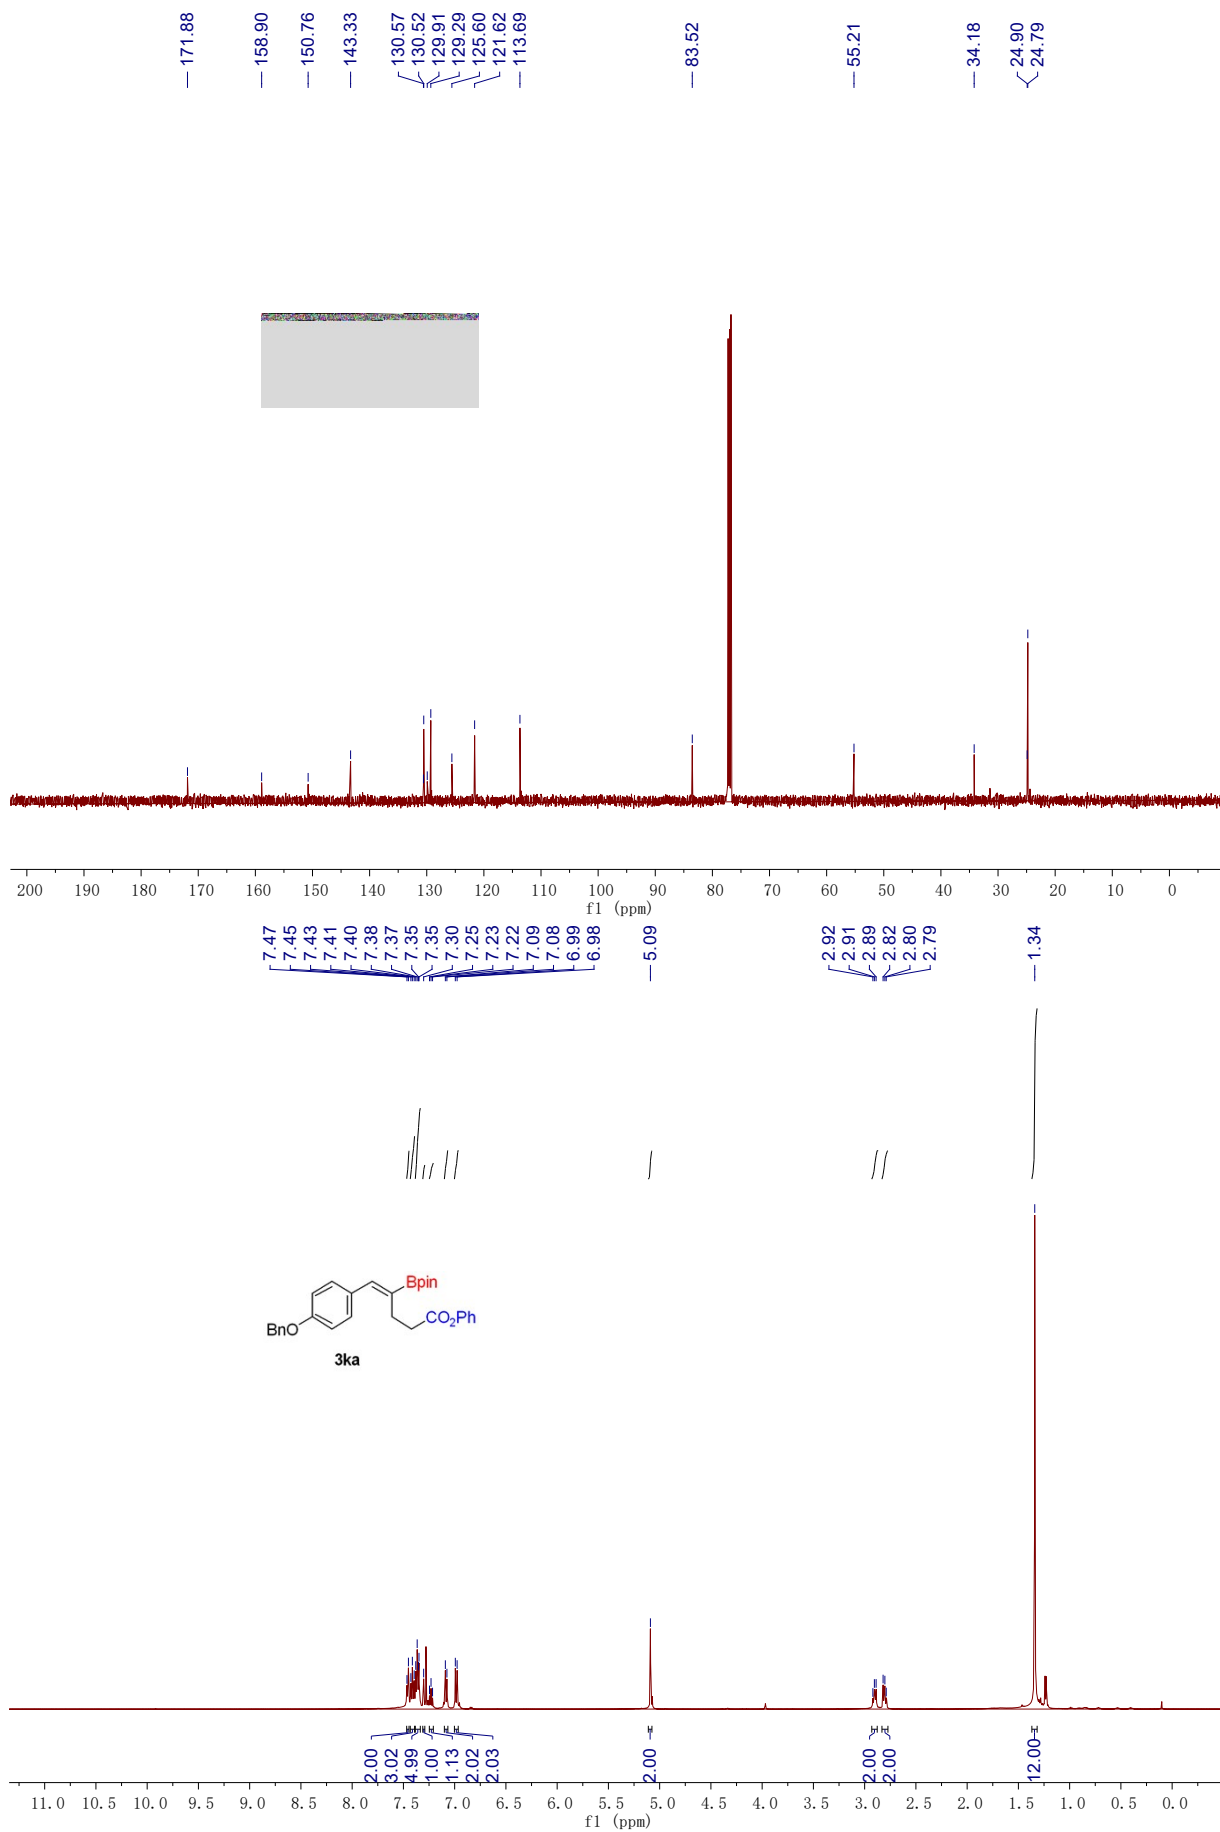



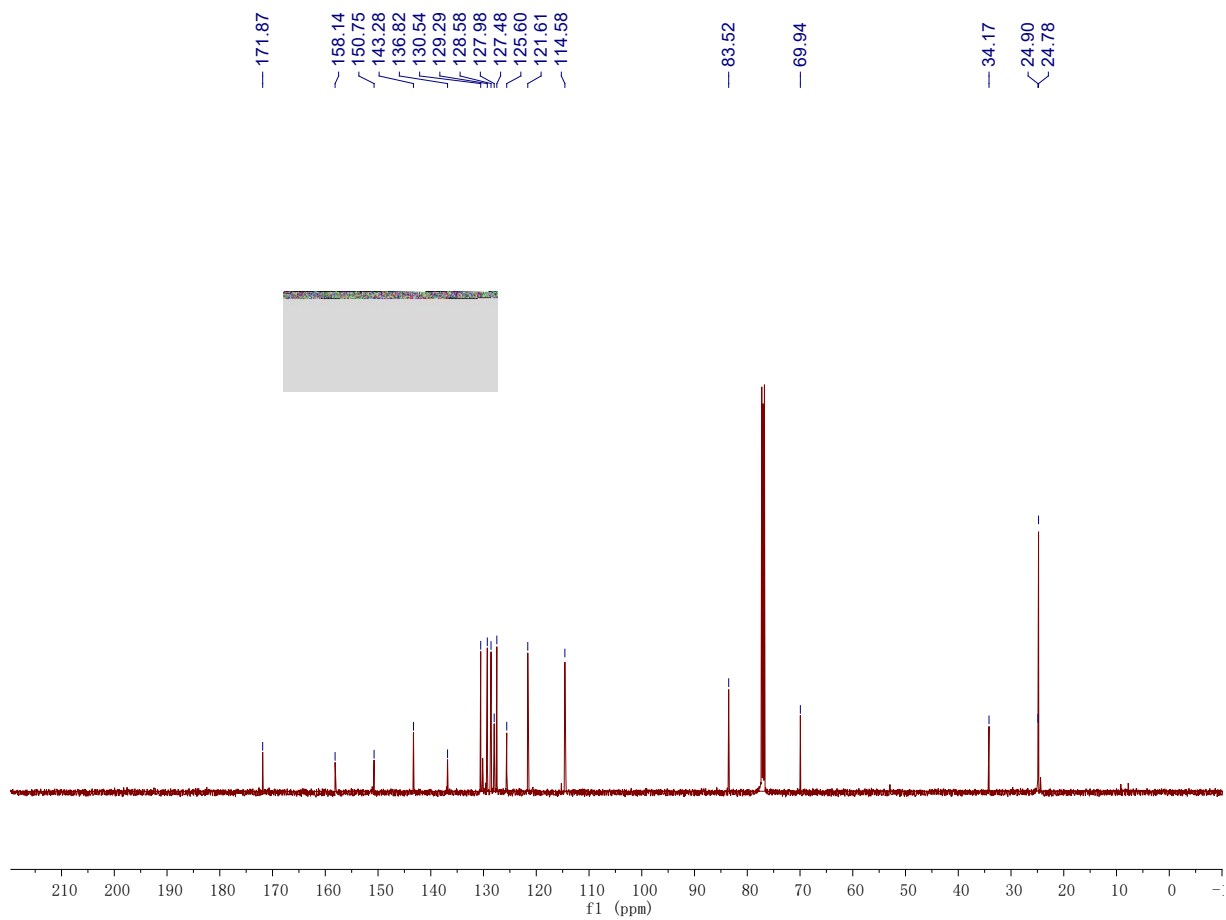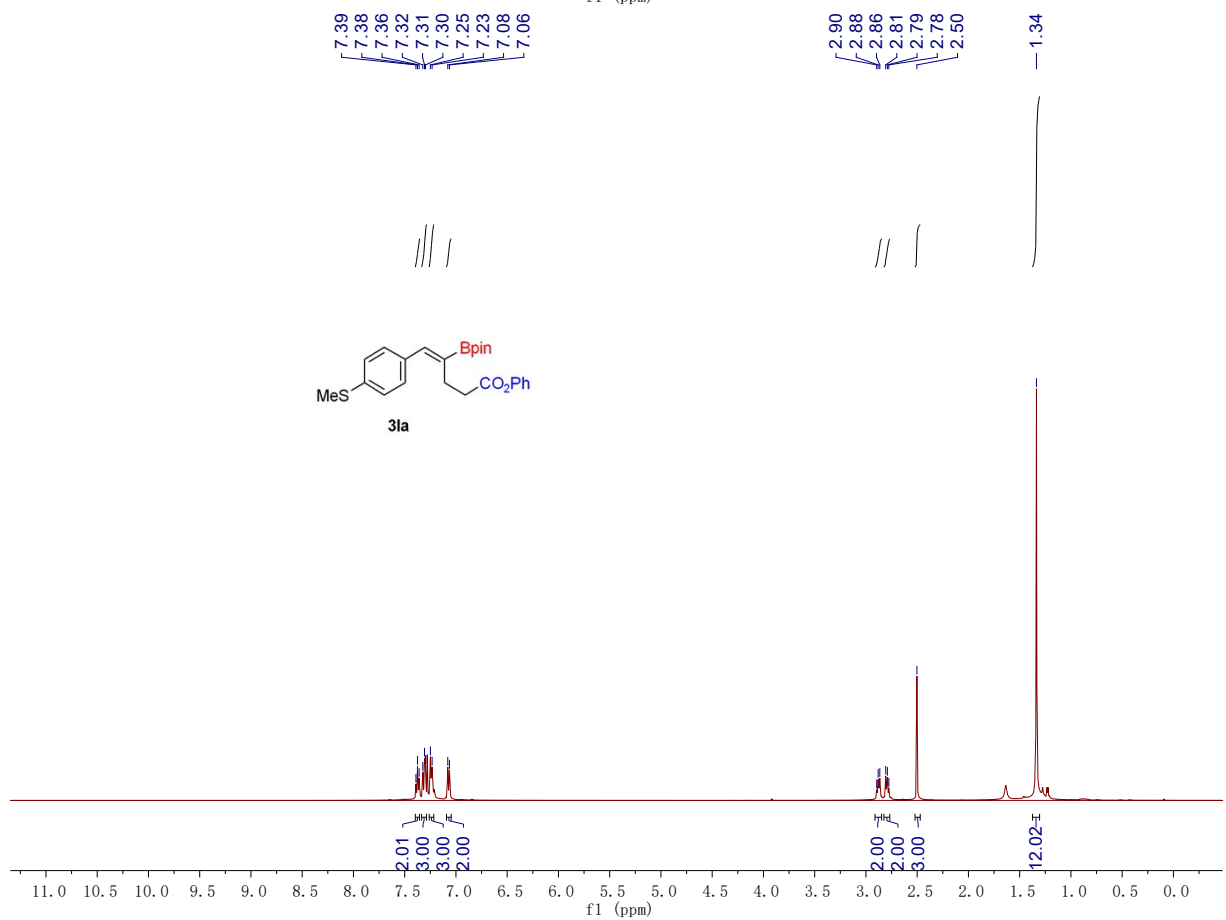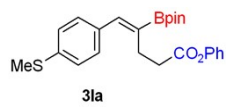

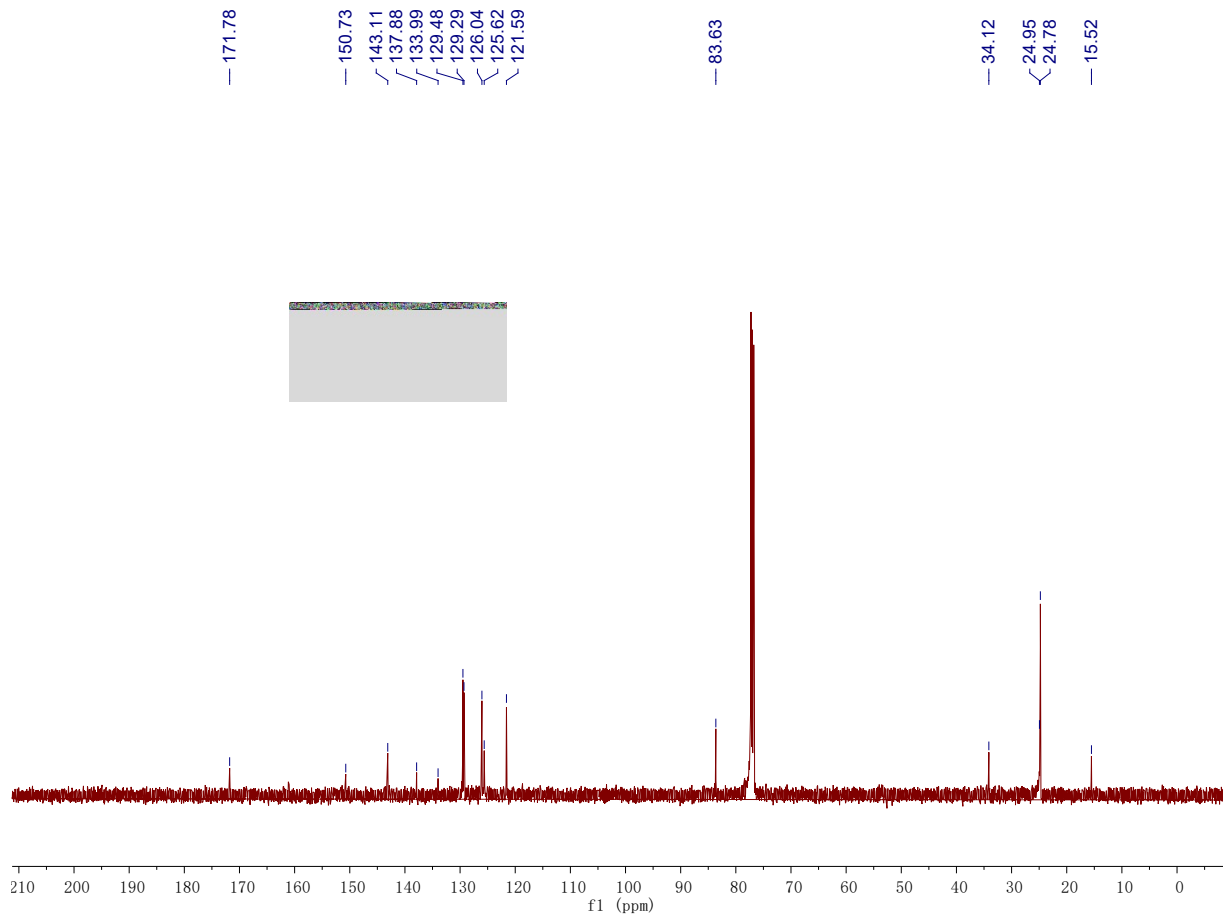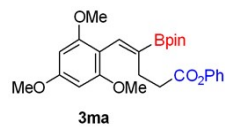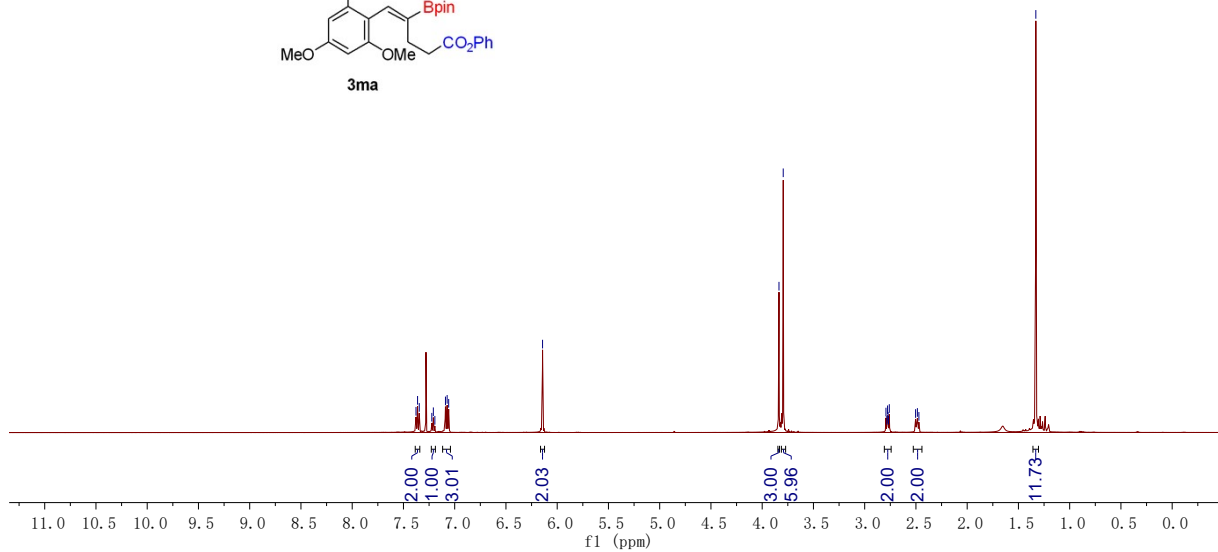

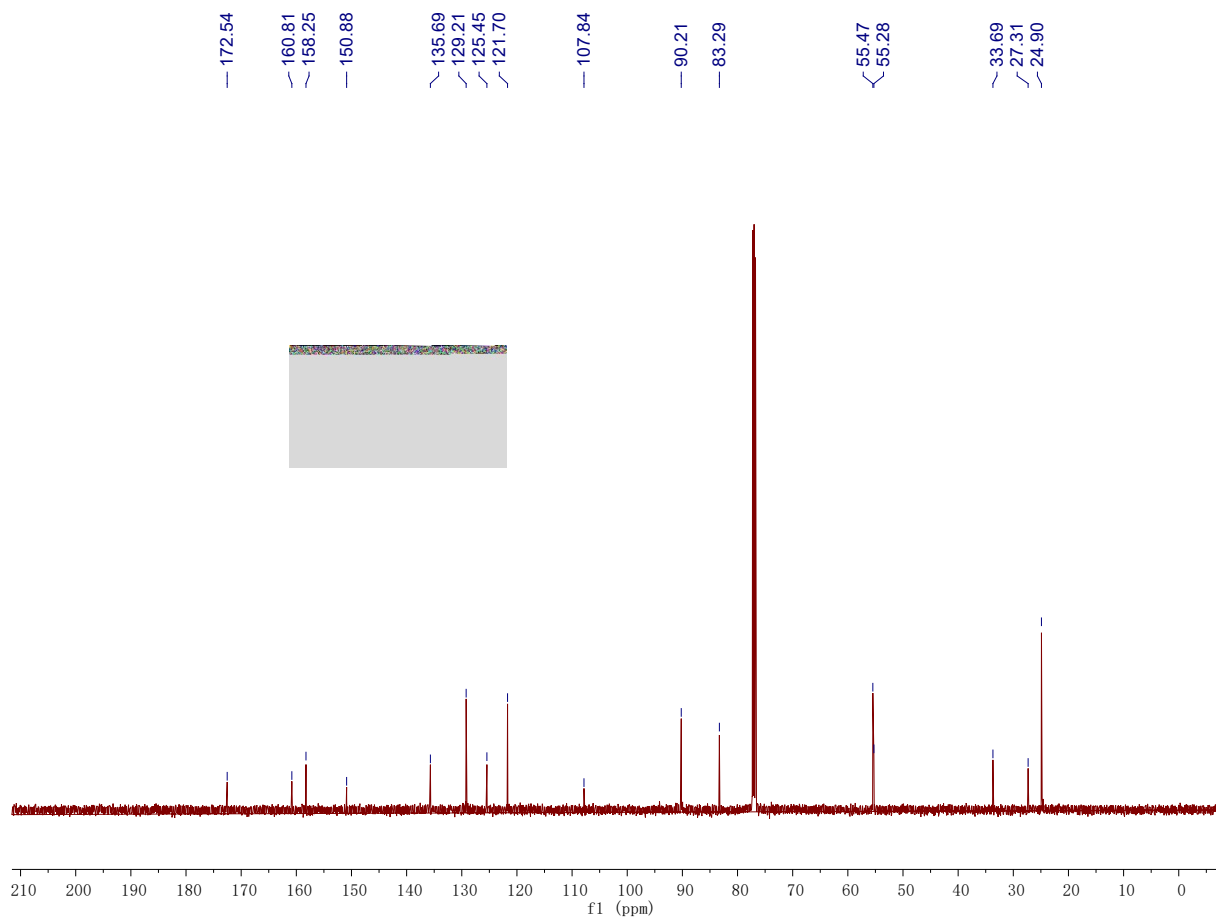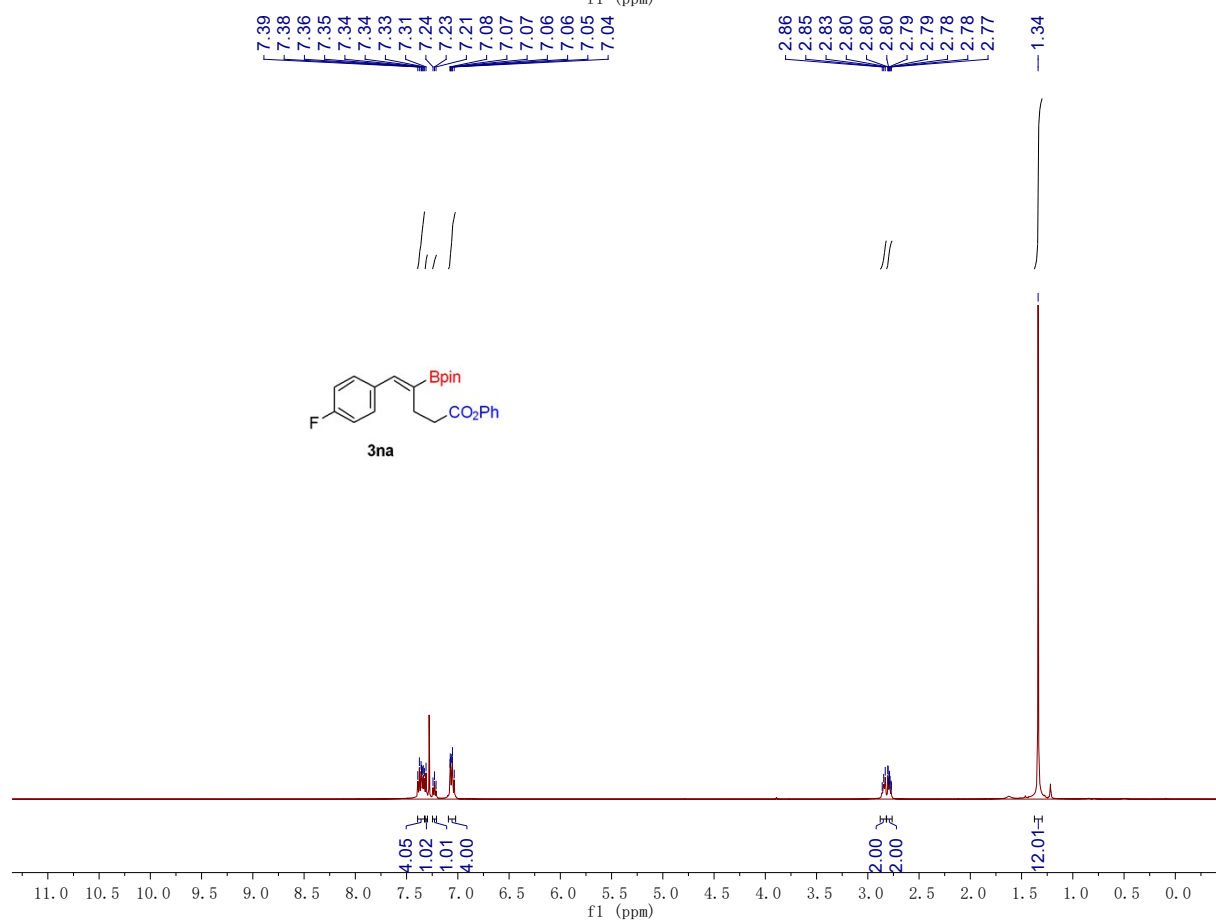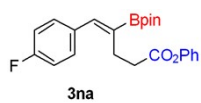

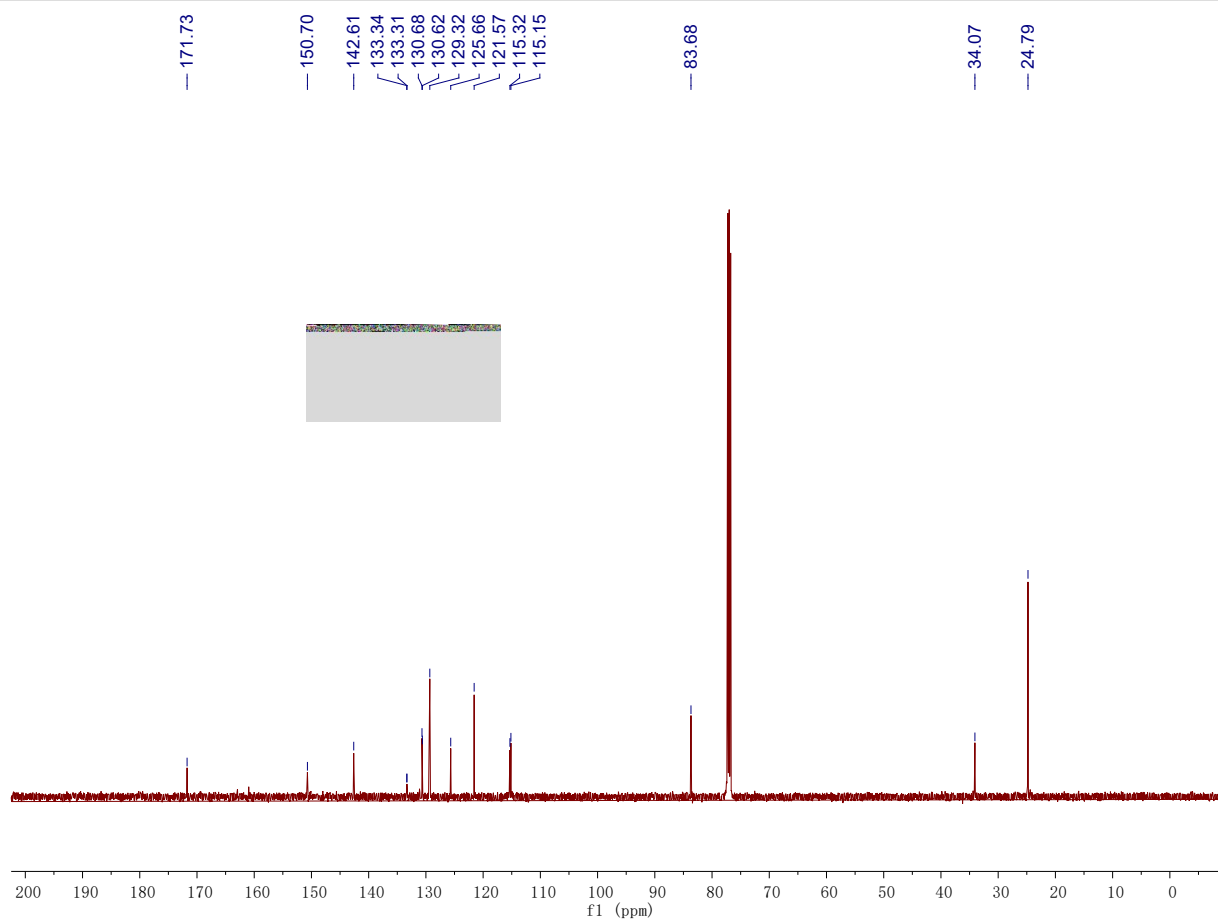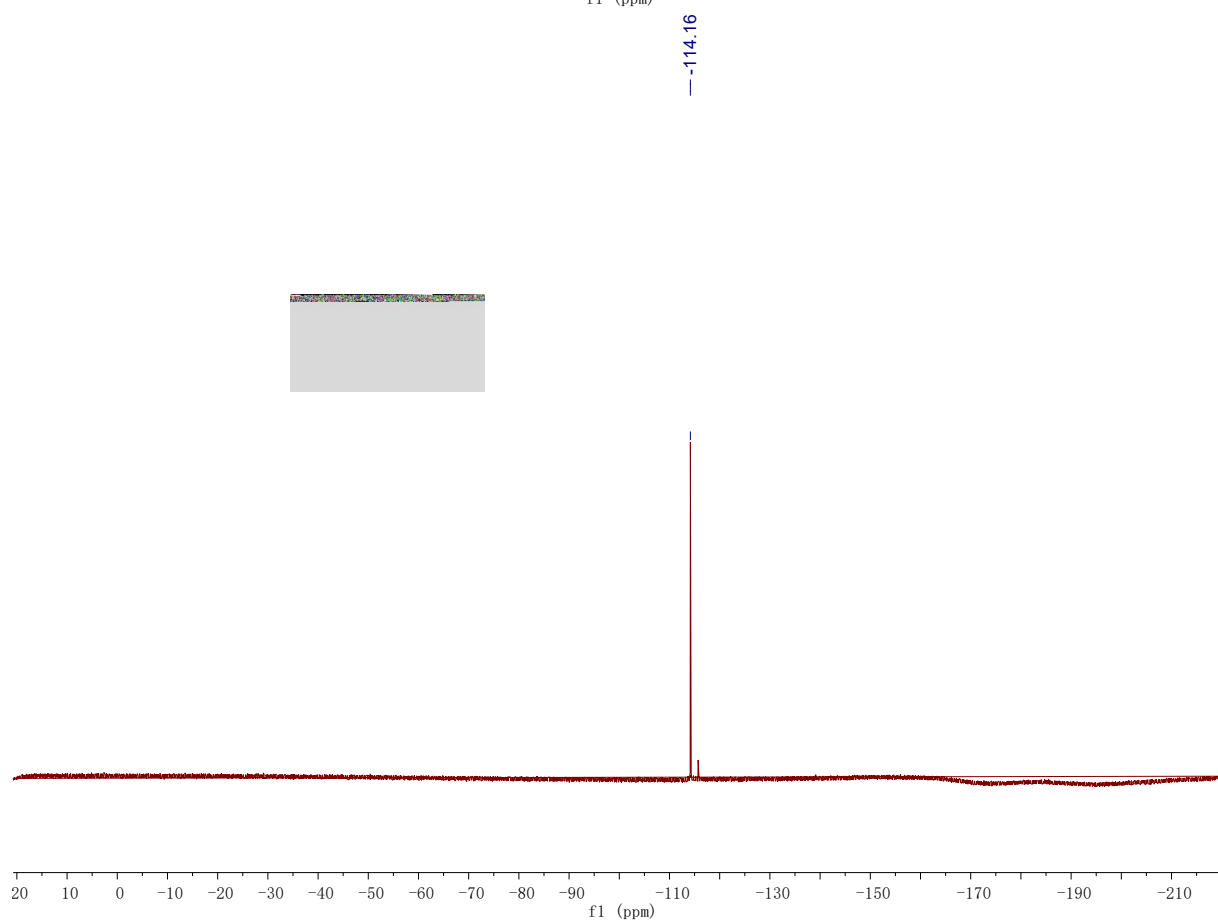

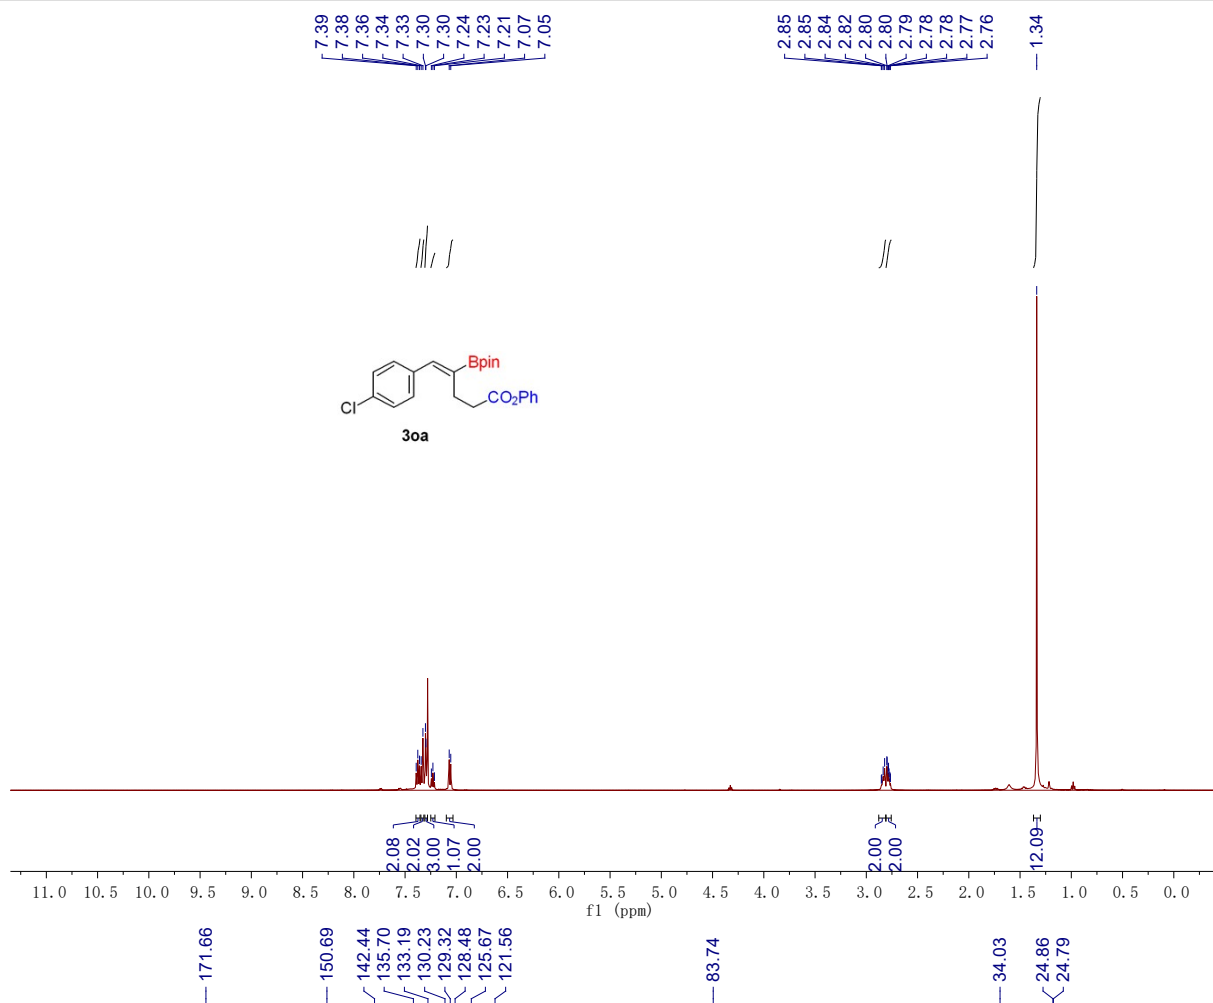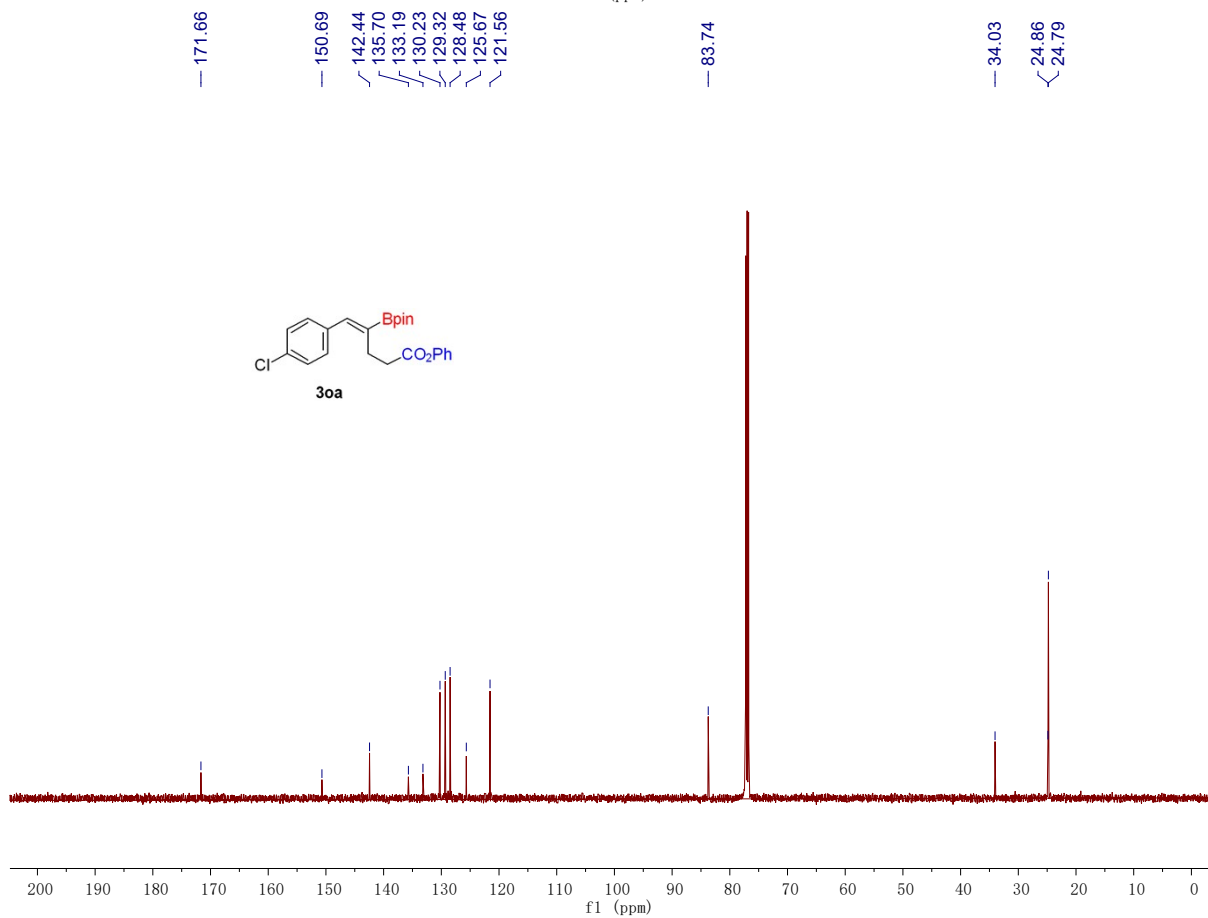

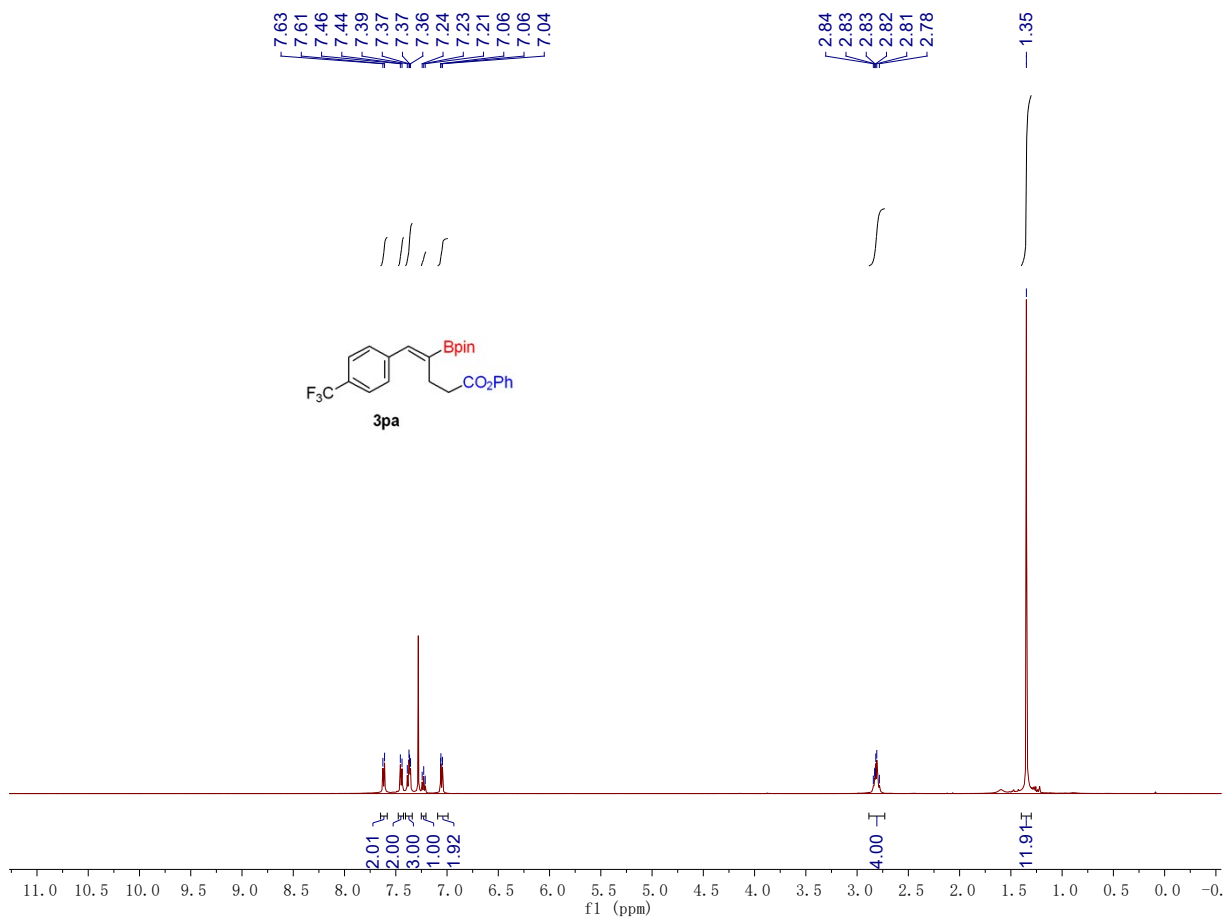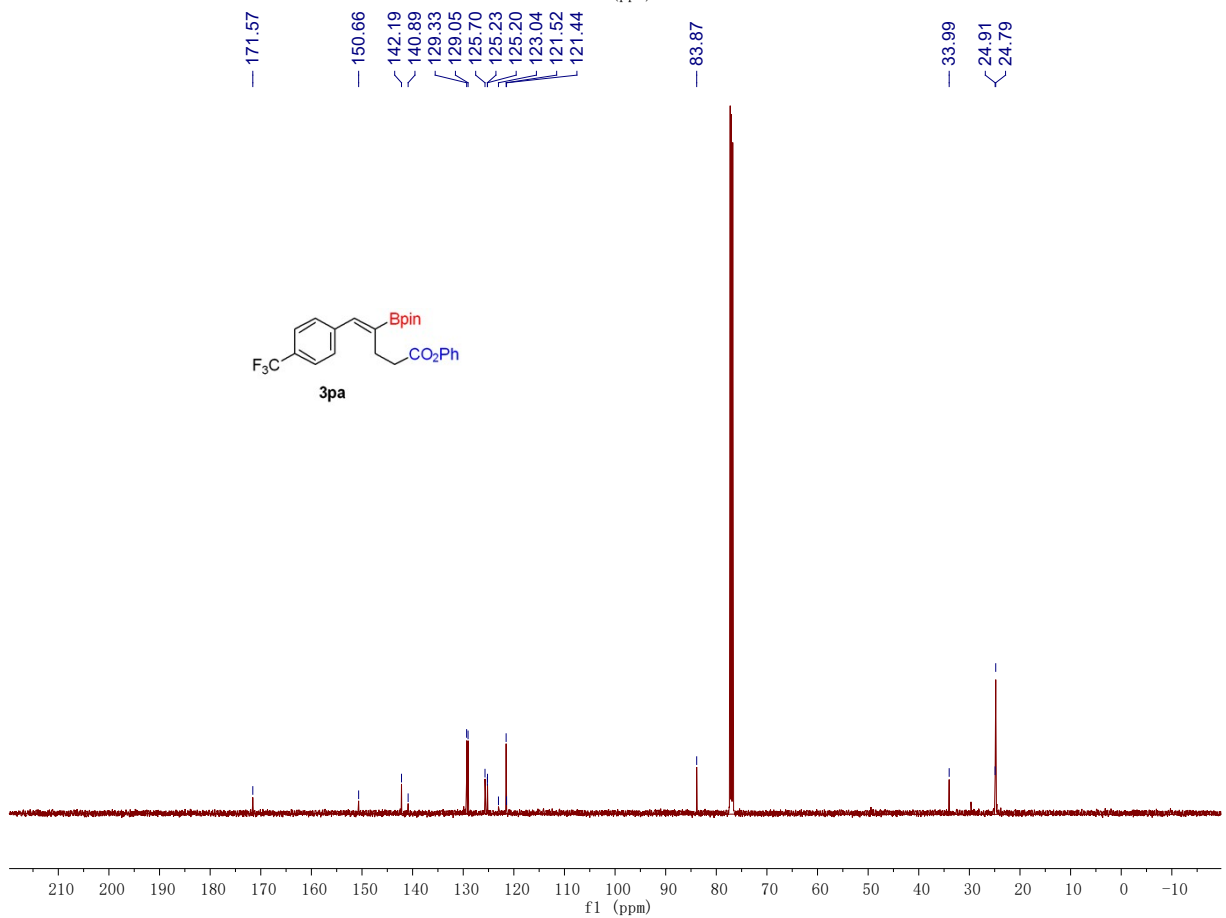

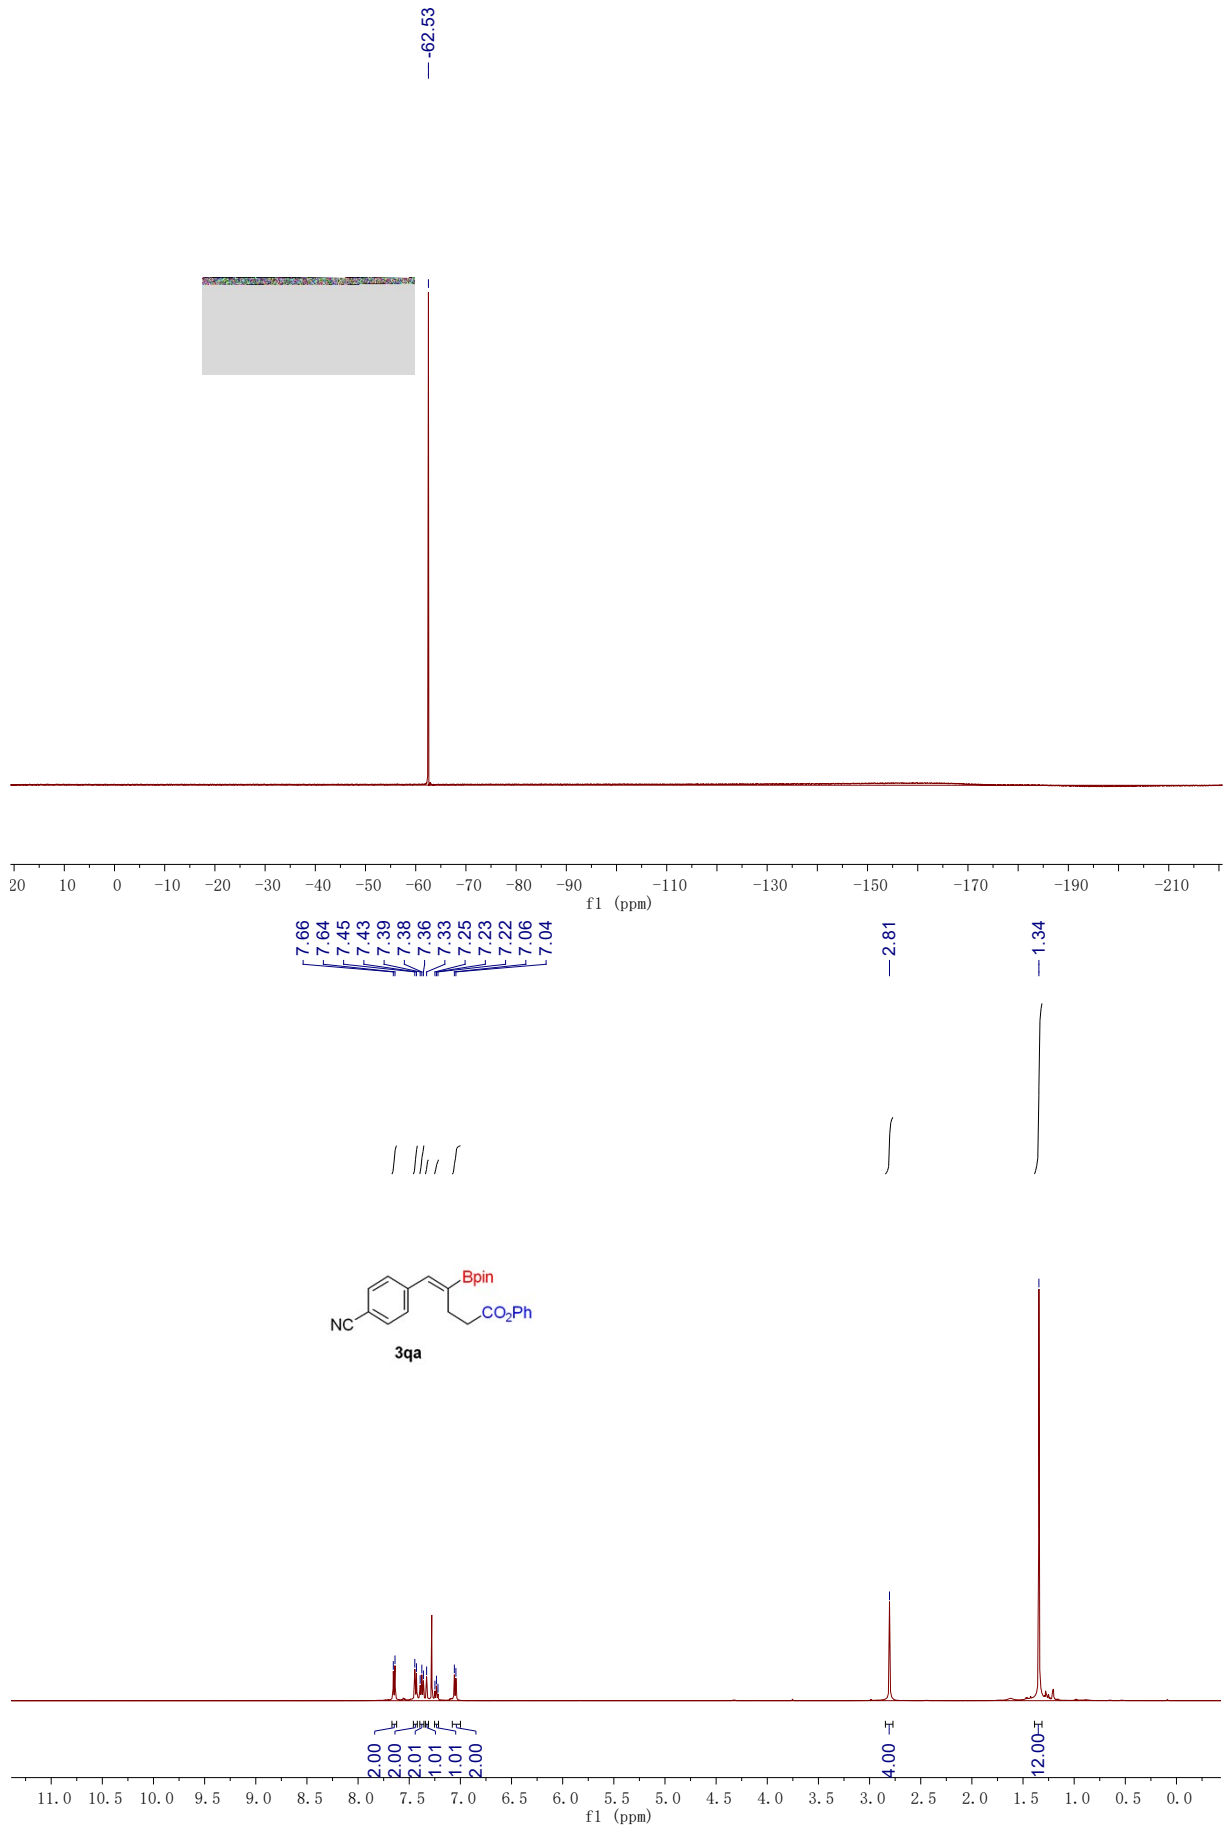

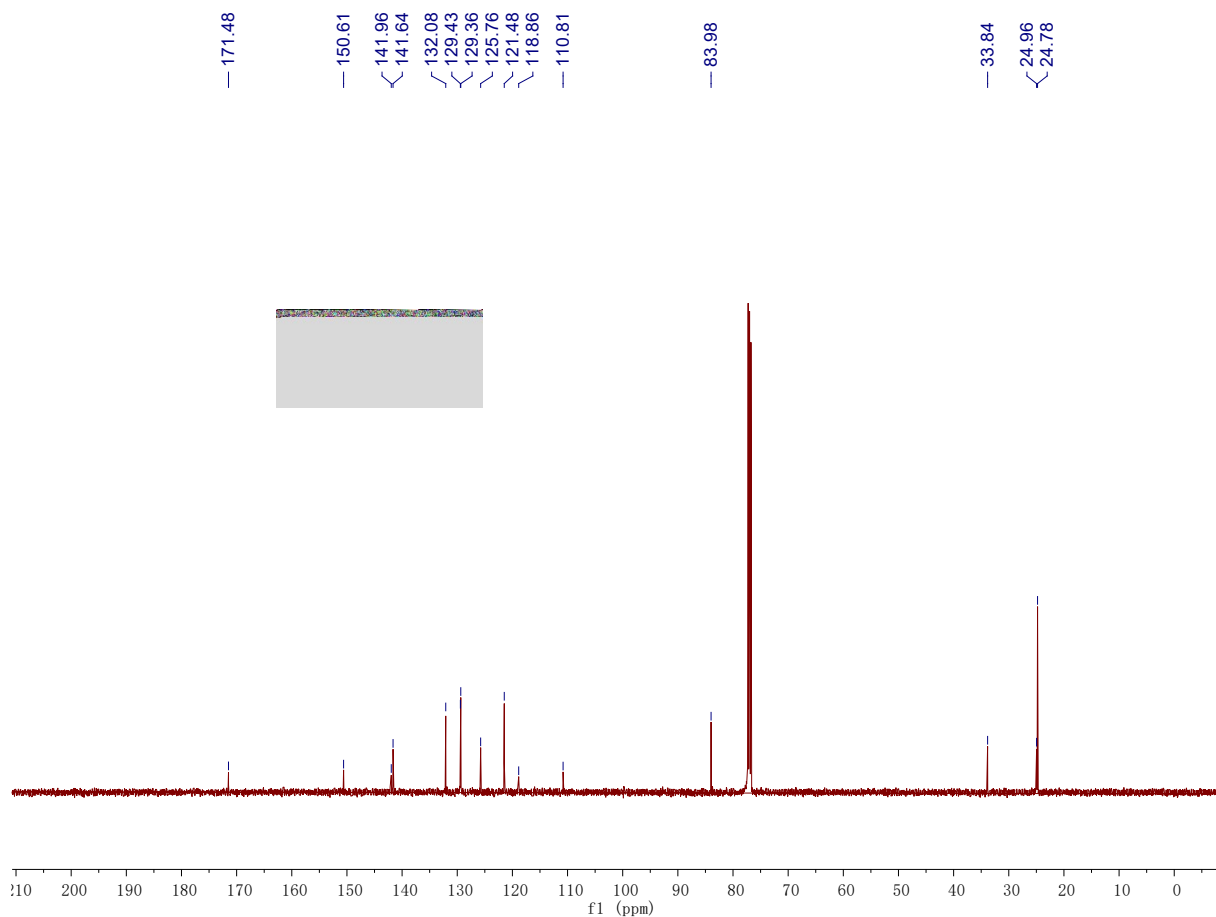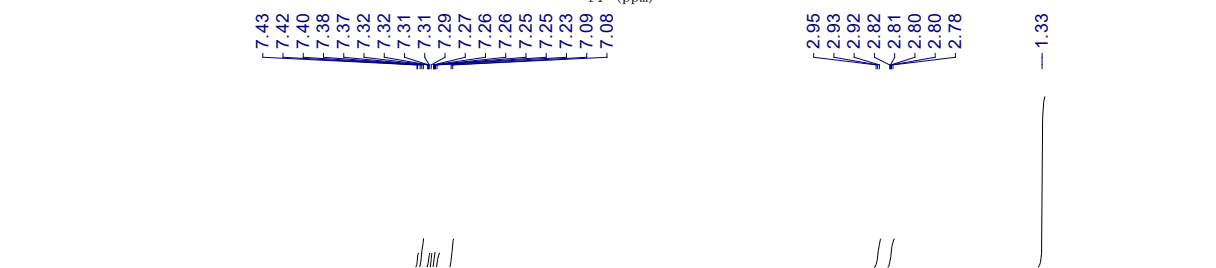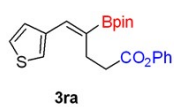



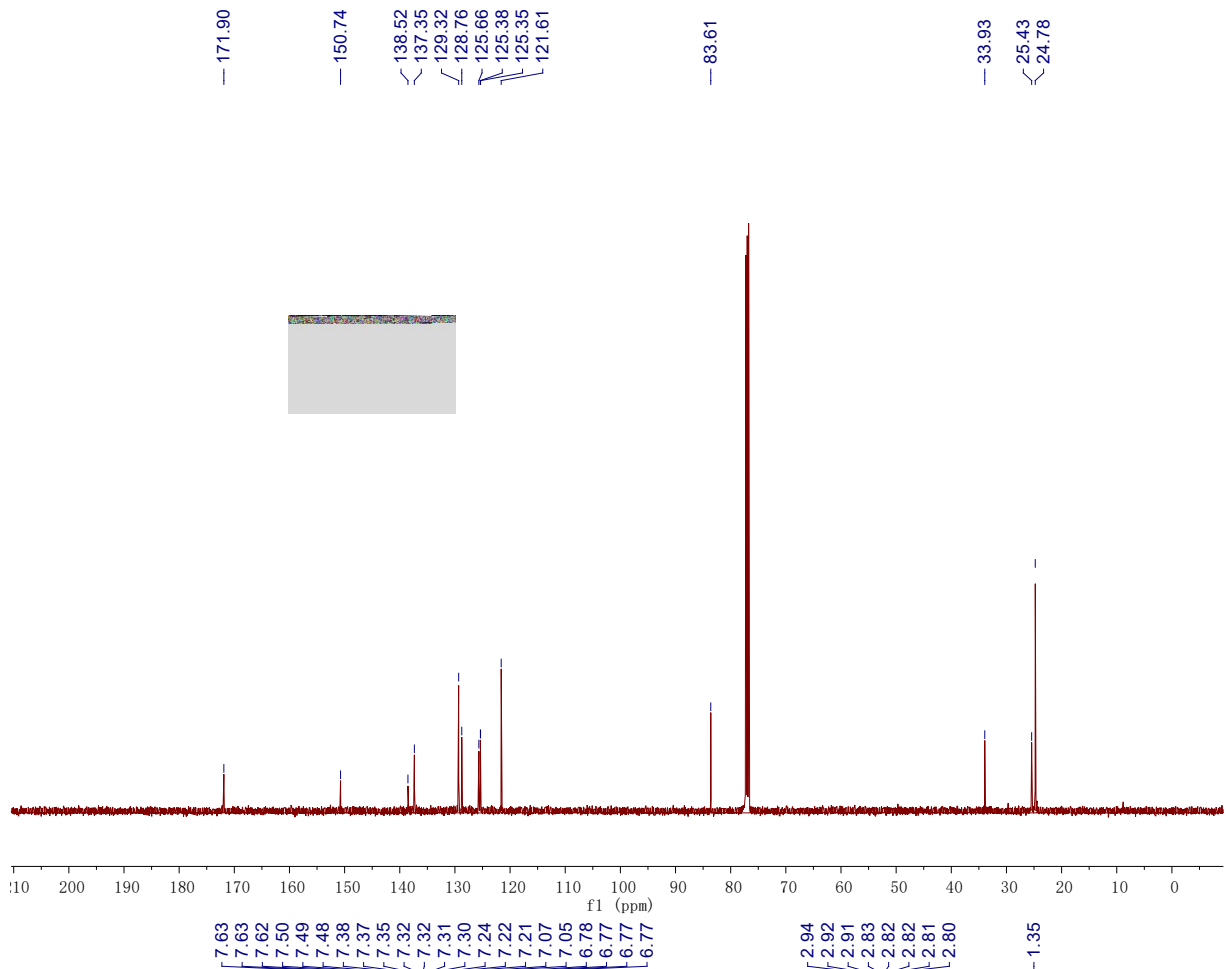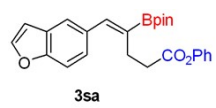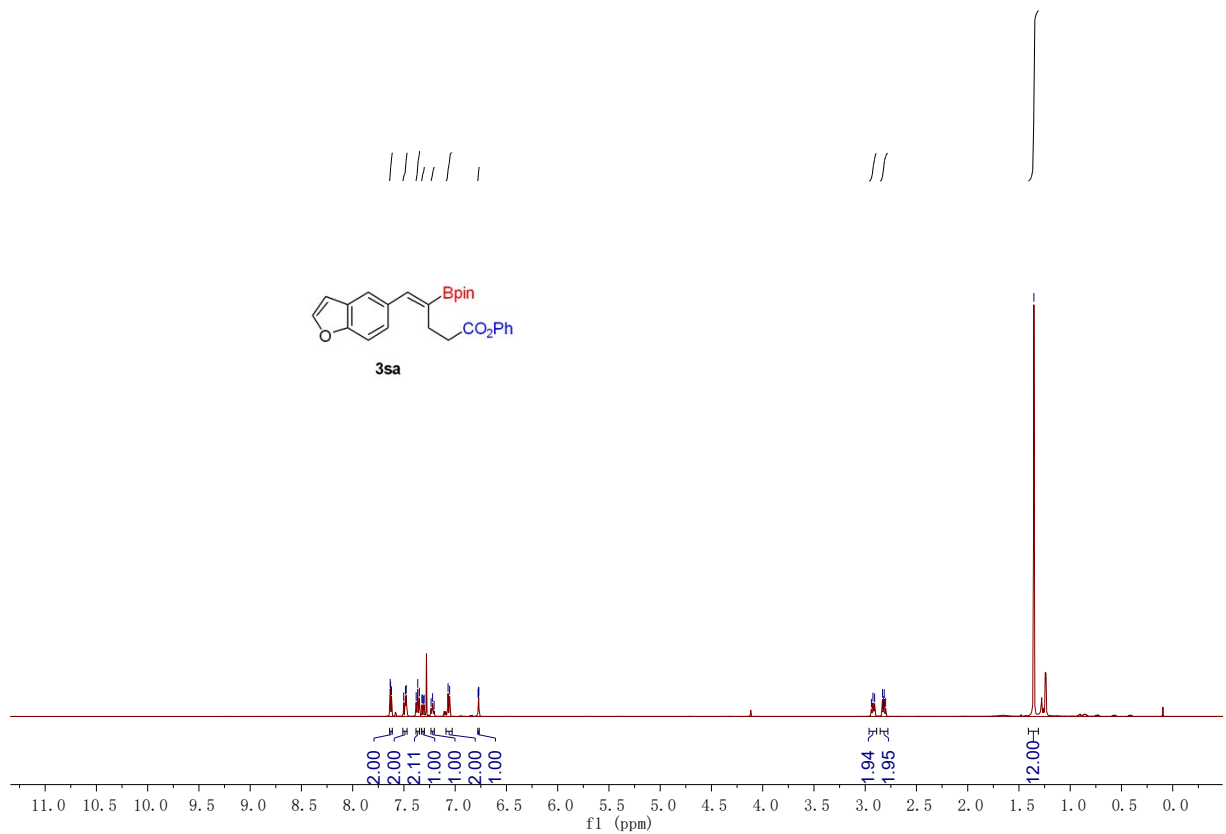

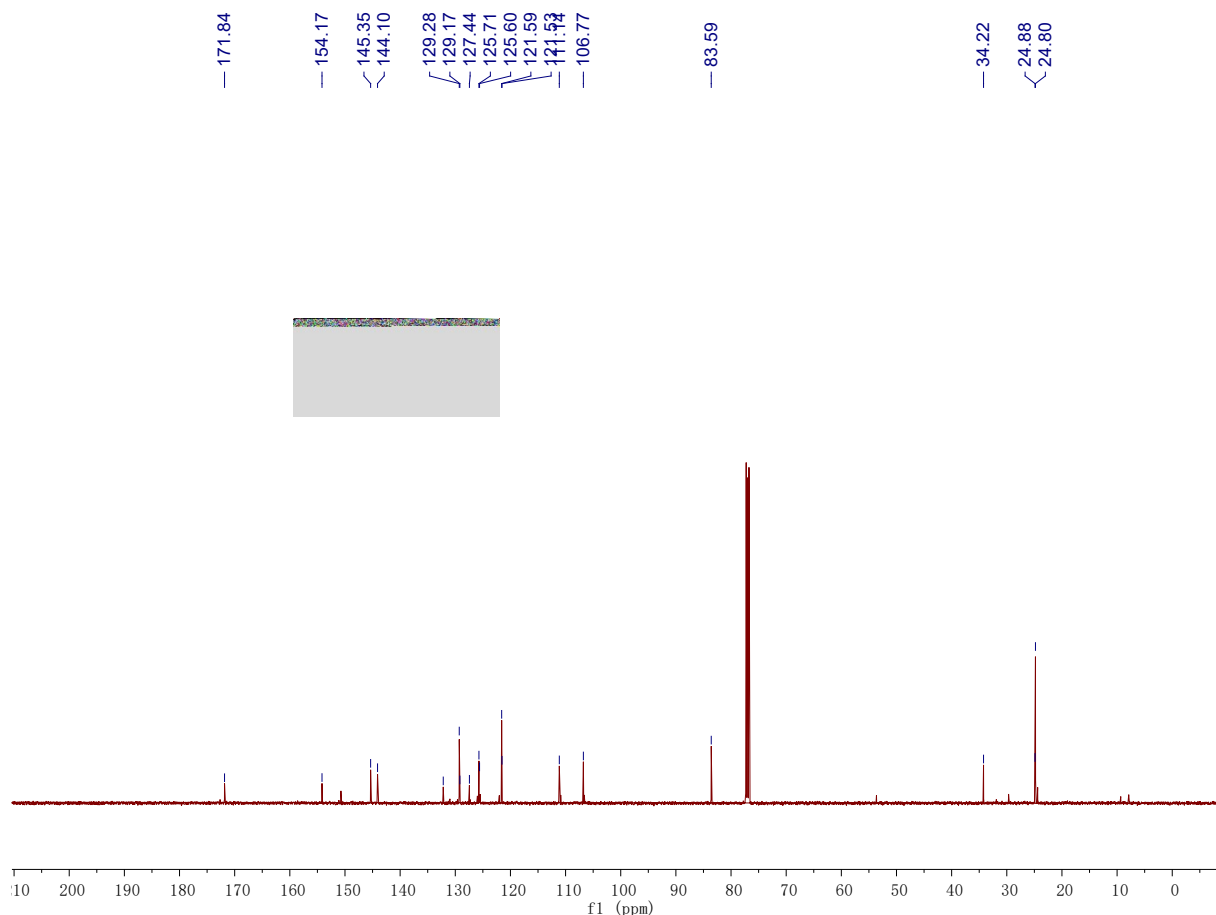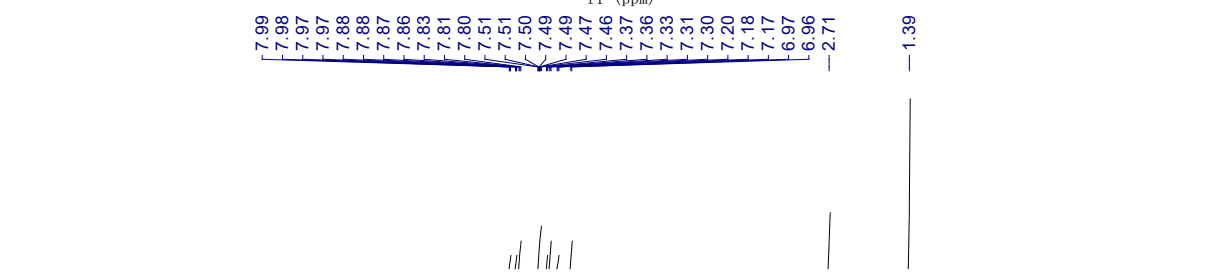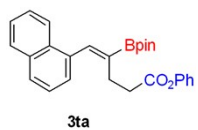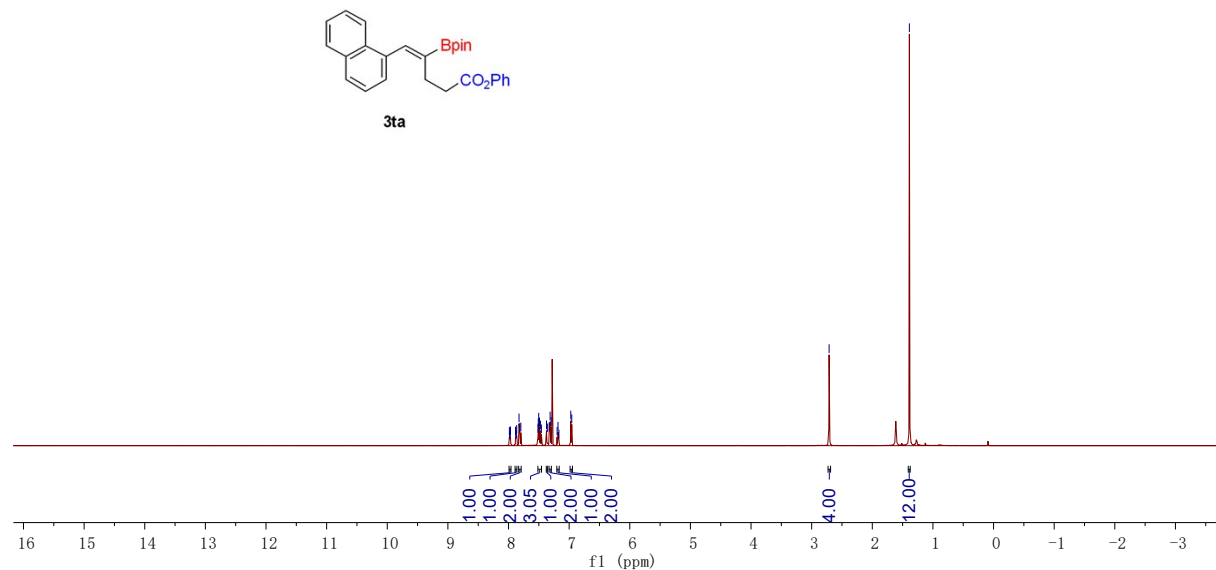

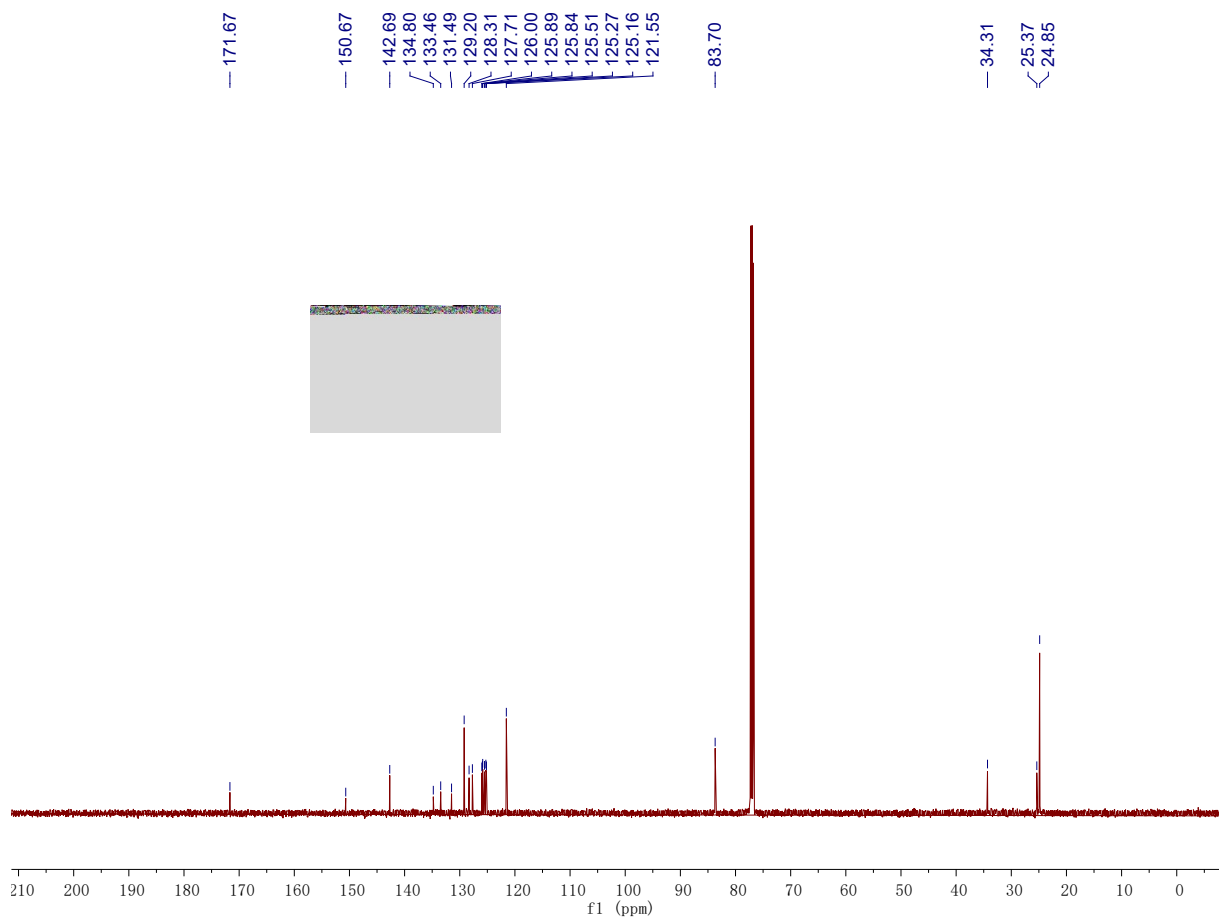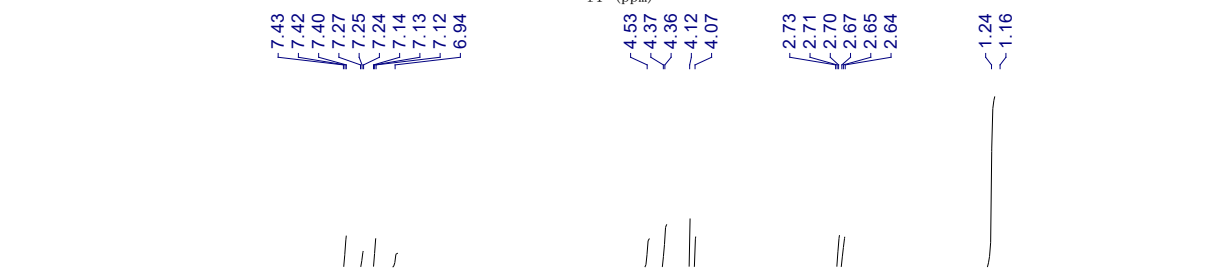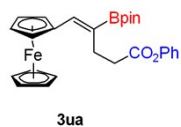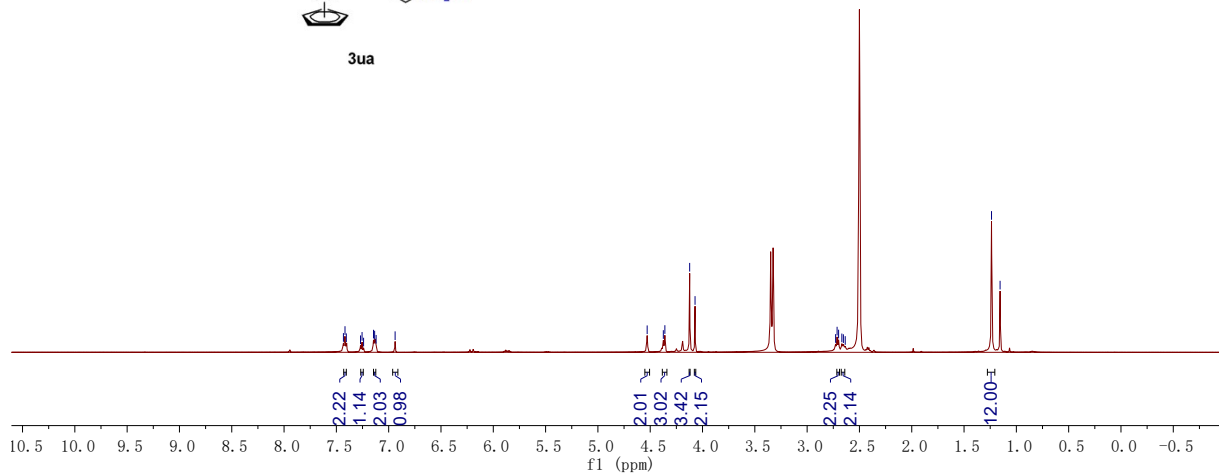

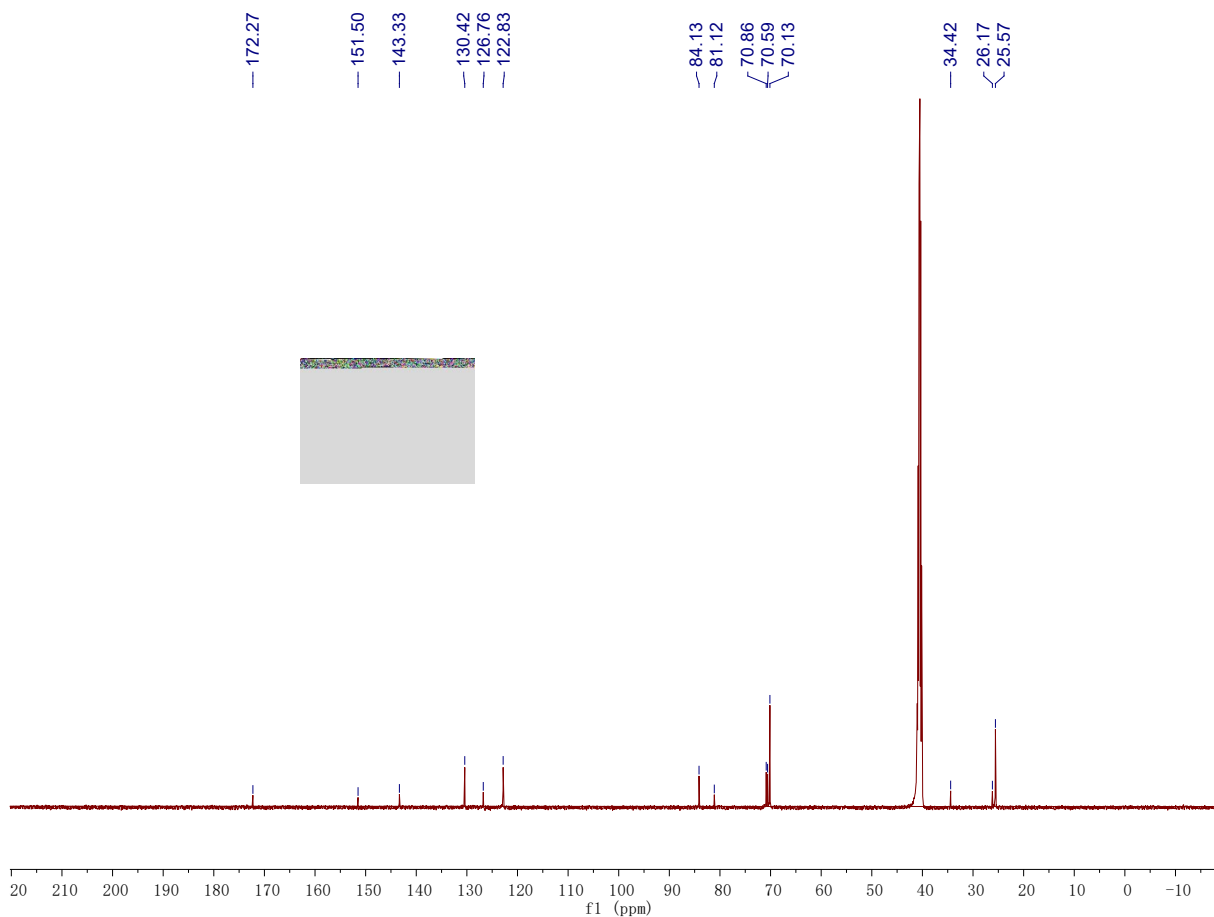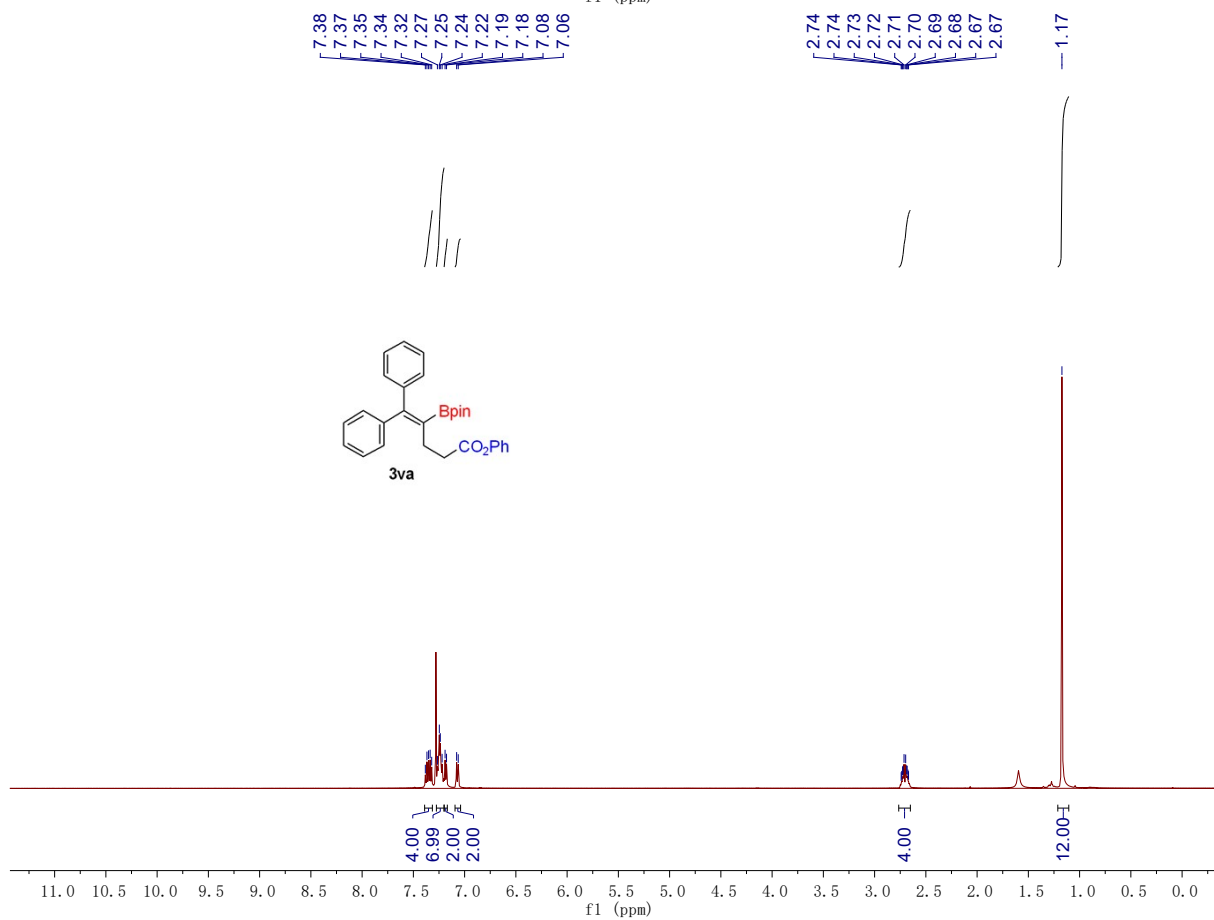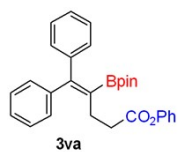

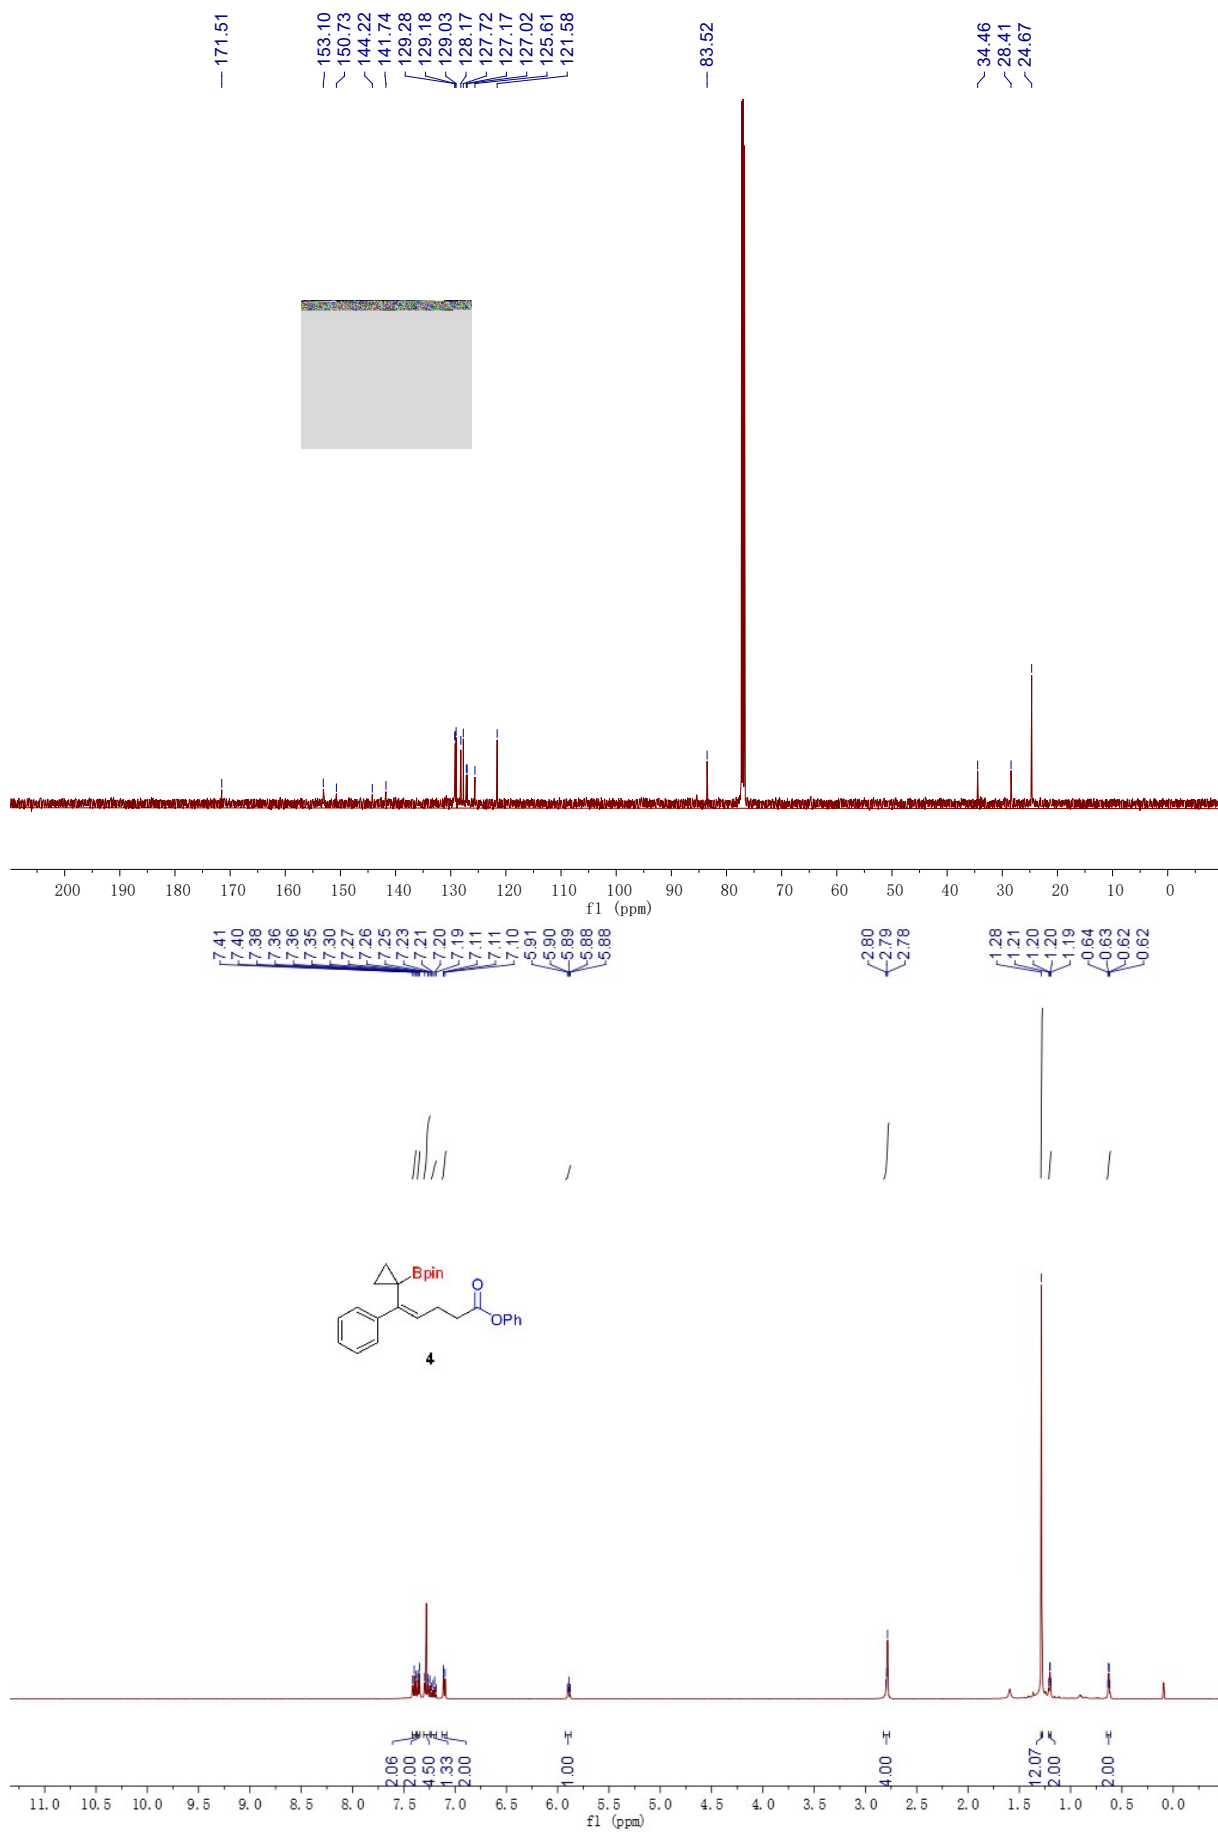

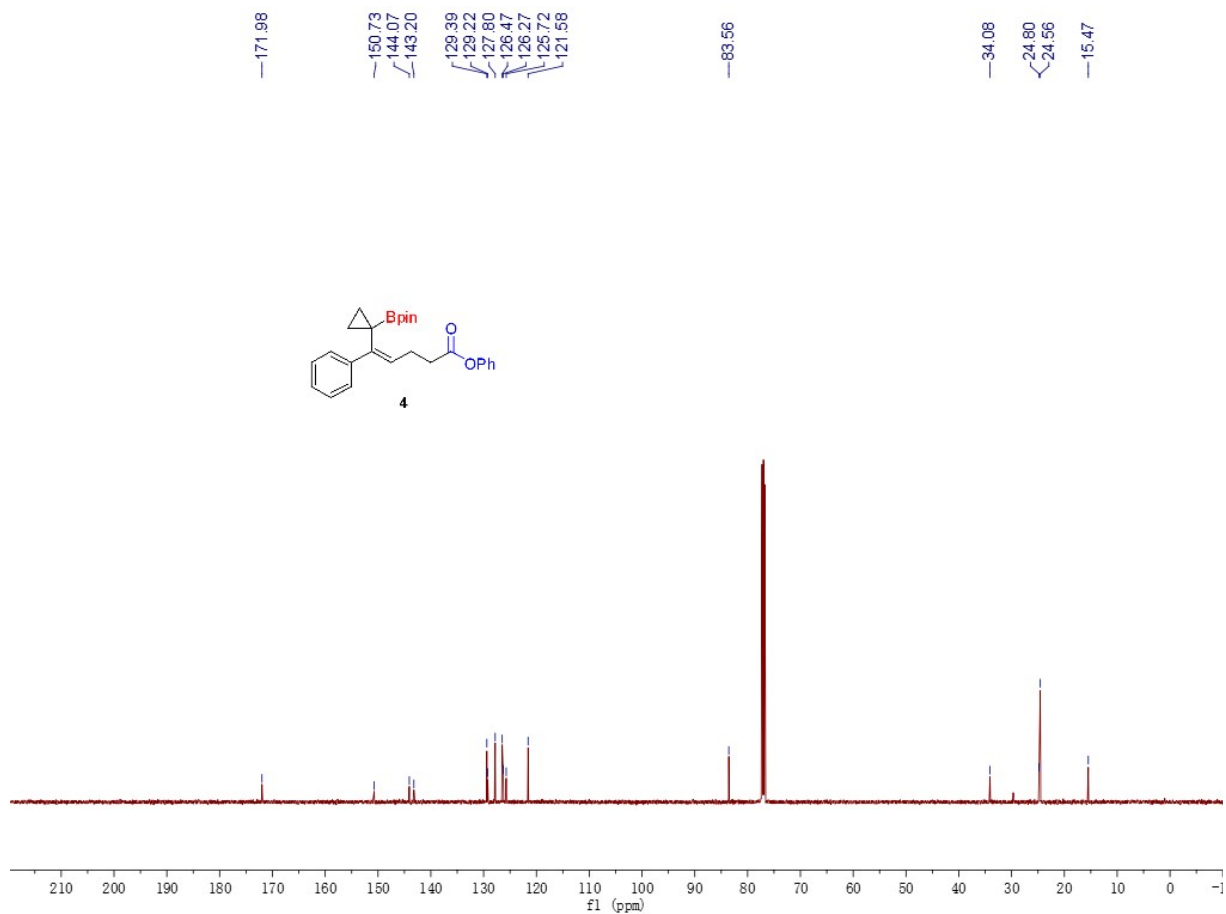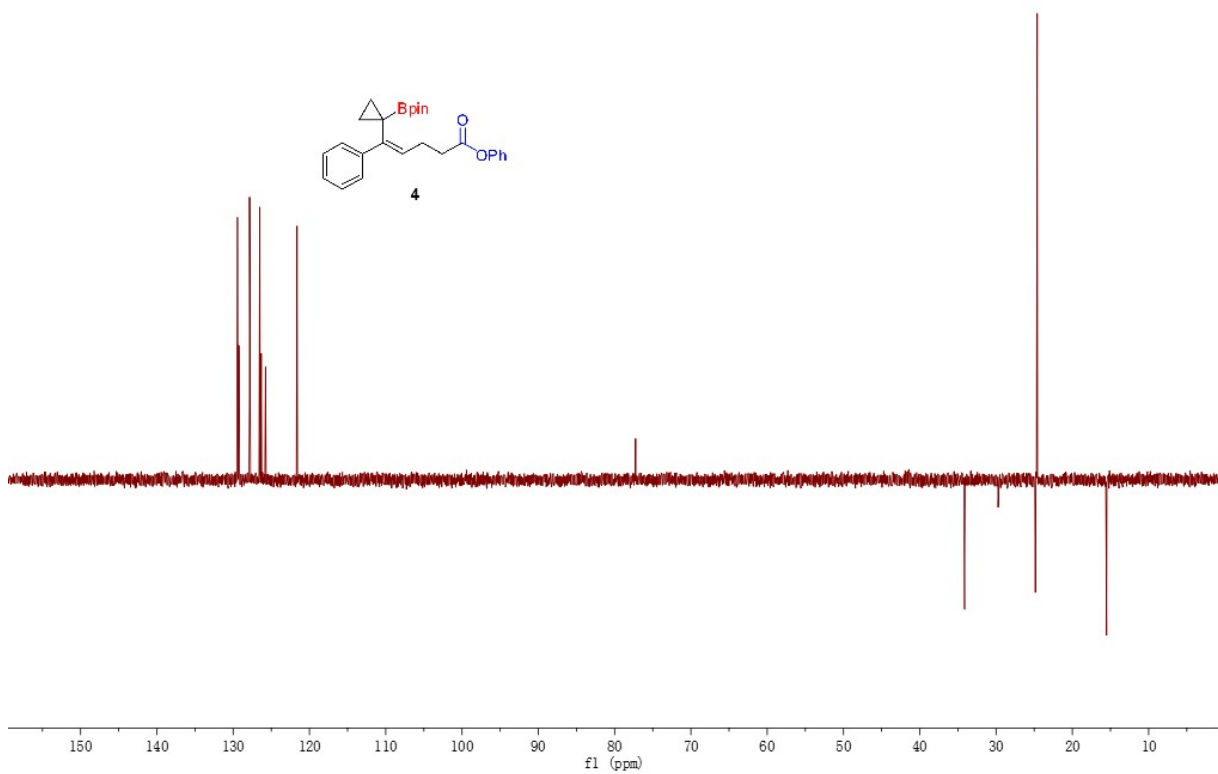



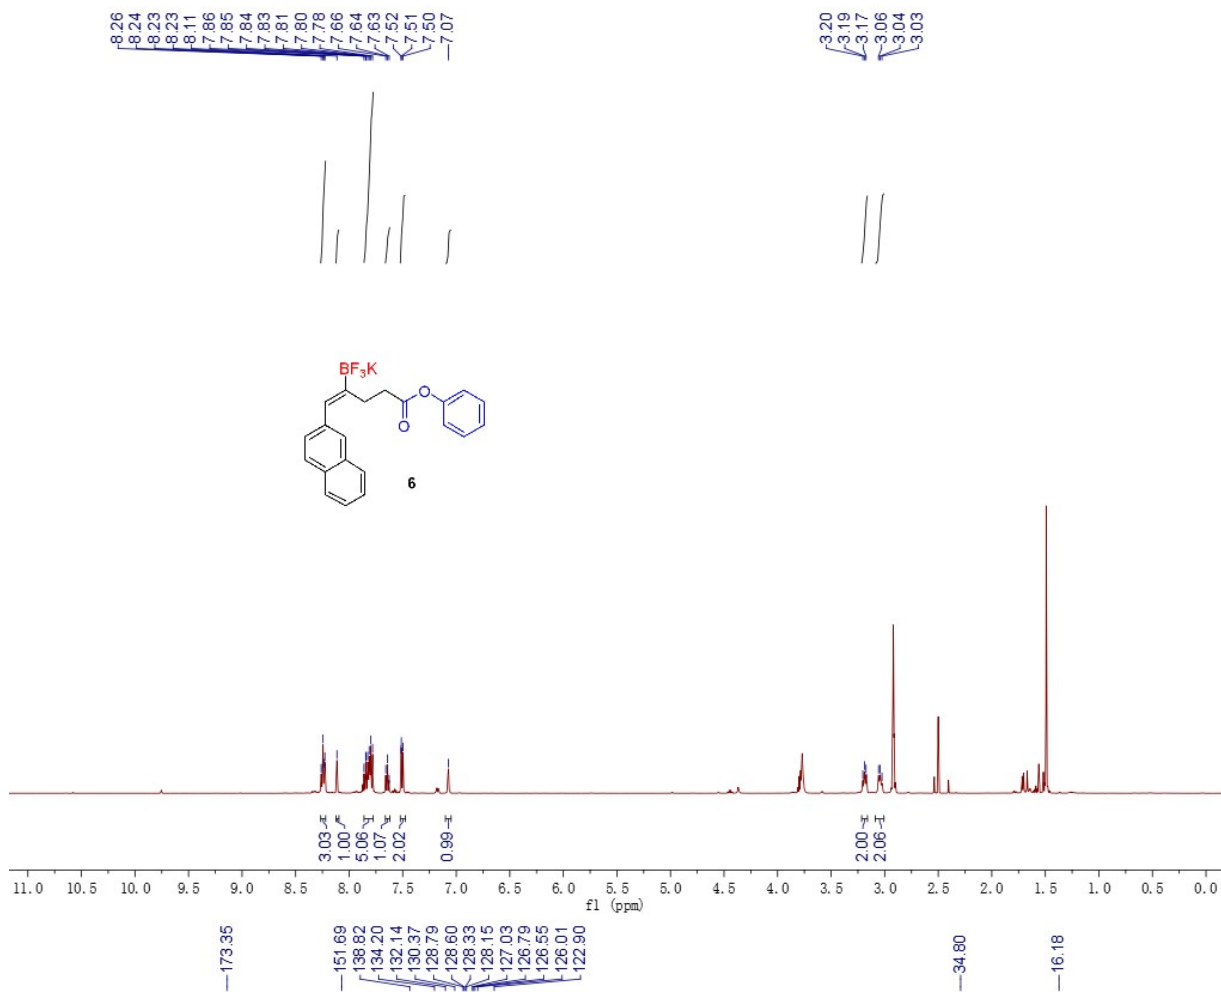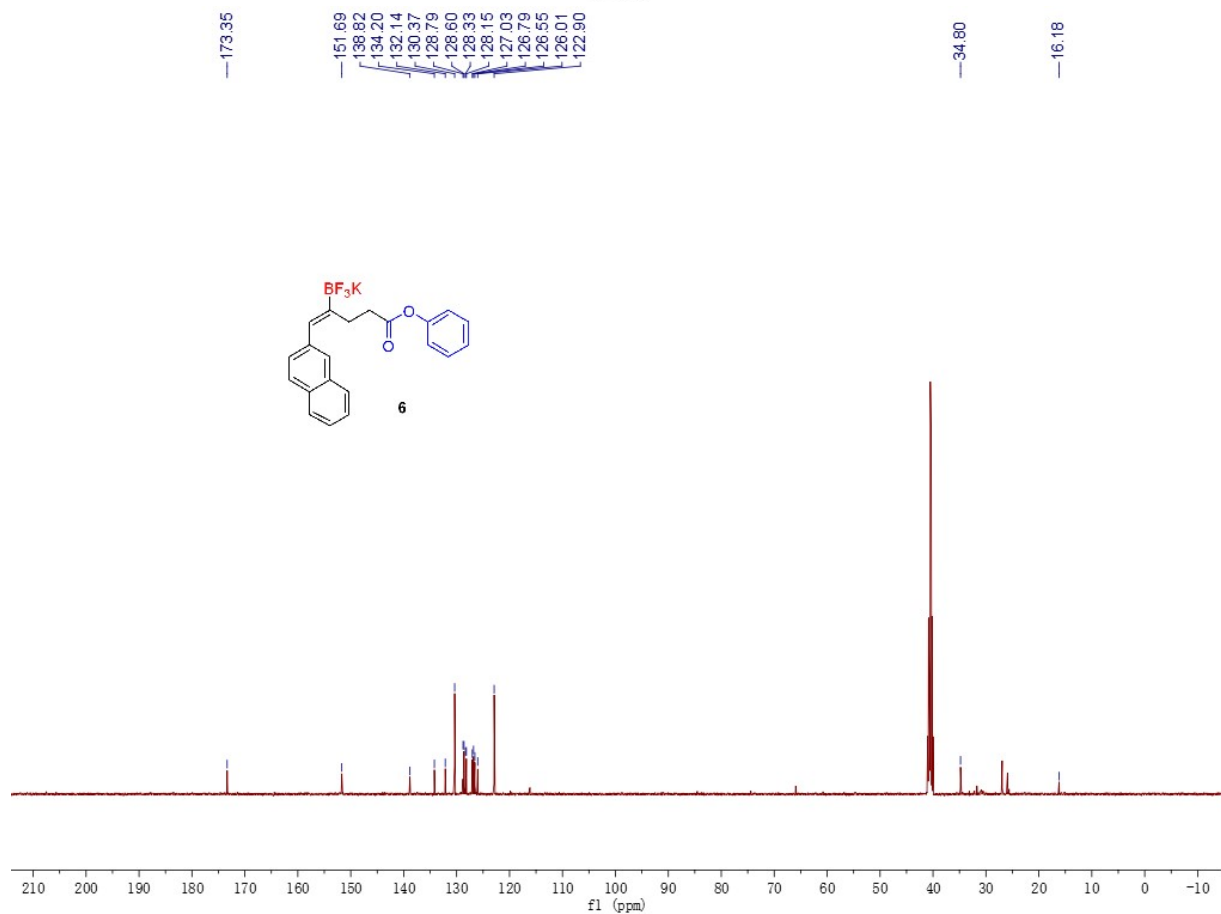



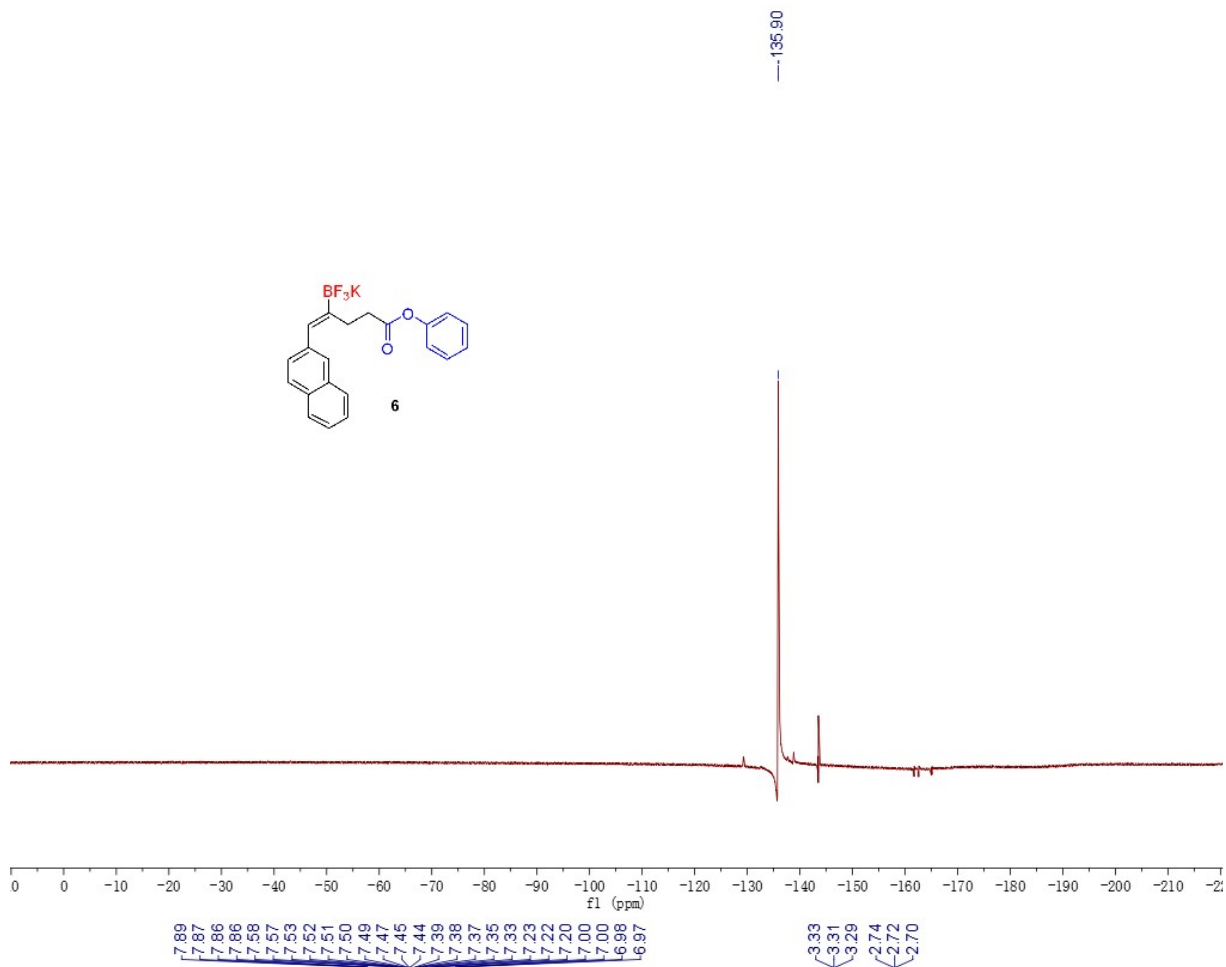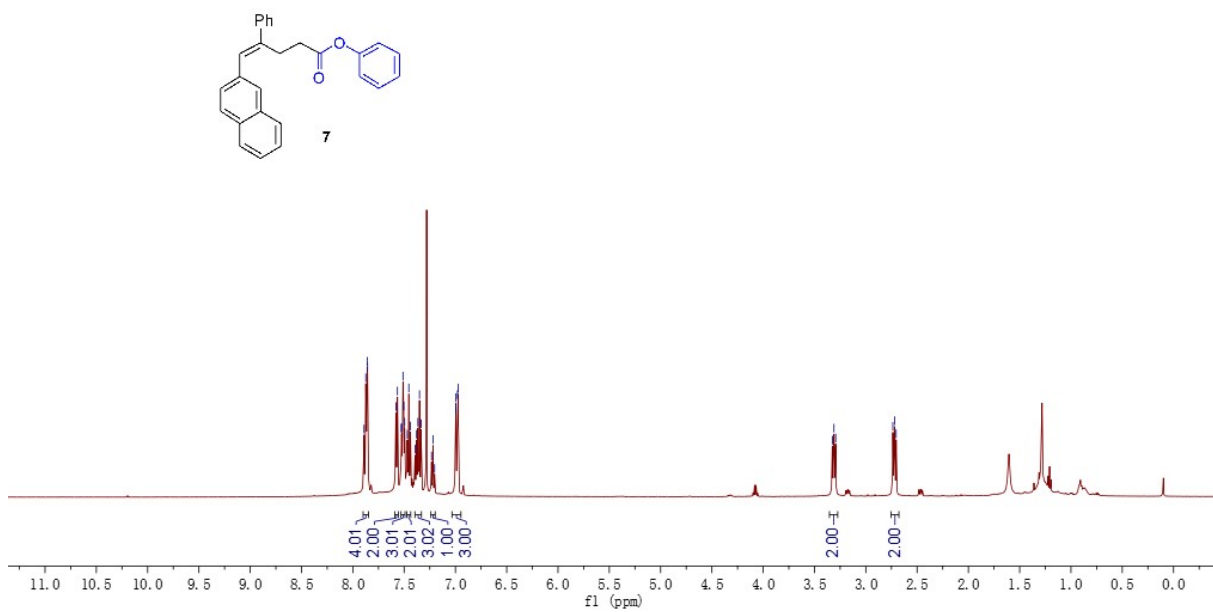

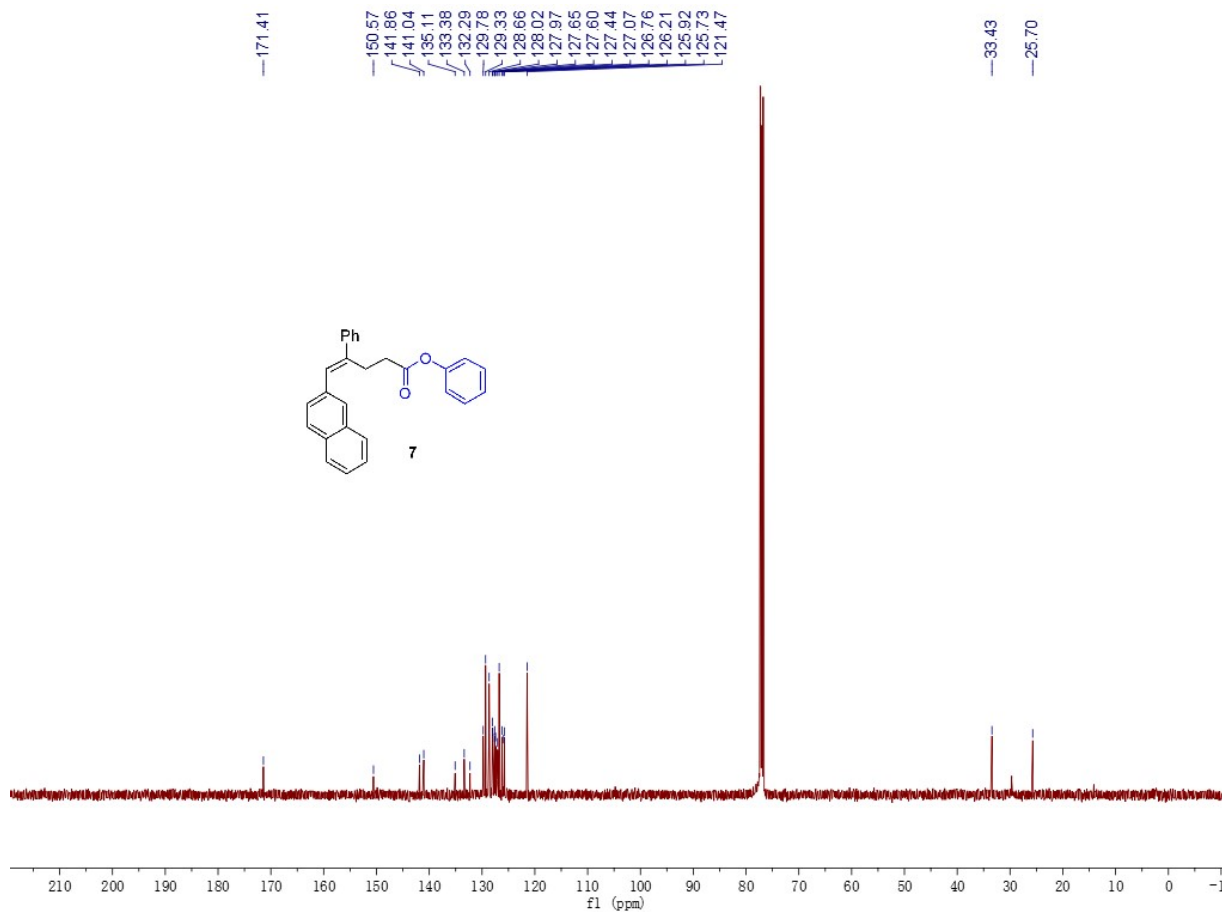

Supplement: d2sc01992b1.pdf [file d2sc01992b1.pdf]
